# Supplementary material for: Control of meiotic entry by dual inhibition of a key mitotic transcription factor
Source: eLife. 2024 Feb 27;12:RP90425. doi: 10.7554/eLife.90425 (PMC10939502; doi:10.7554/eLife.90425)
Supplement: Supplementary file 1. [file elife-90425-supp1.xlsx]

## Sheet: Sheet1
	log2FoldChange	neglog10(padj)		early meiotic genes (EMG)	SBF
ILM1	0.194664	0.0794125		yes
ASF1	-0.292499	0.138781		yes
ZIP2	-0.240425	0.160444		yes
DPB2	-0.168522	0.164287		yes
MRC1	-0.34985	0.244768		yes
SEN34	-0.416414	0.272207		yes
ECO1	-0.479824	0.278556		yes
SMC6	-0.306018	0.300492		yes
RNR1	-0.386704	0.331141		yes
ESC8	-0.466838	0.411987		yes
NSE4	-0.29987	0.414998		yes
CDC45	-0.585011	0.471417		yes
HCM1	-0.368061	0.513209		yes
SPT21	-0.507265	0.722018		yes
PRI2	-0.79812	0.762451		yes
ICL2	-0.937661	0.764627		yes
PMS1	-0.413225	0.813108		yes
YDR018C	-0.771959	0.822701		yes
CST9	-0.660709	0.978566		yes
CTF4	-0.536238	1.04629		yes
CDC21	-0.783785	1.06663		yes
DOC1	-1.32377	1.08529		yes
MEI5	-1.63146	1.08806		yes
POL1	-0.772013	1.09563		yes
YGL081W	-1.18896	1.10476		yes
HMG2	-0.913069	1.11086		yes
MSH4	-1.35543	1.18592		yes
ECM11	-1.74023	1.22005		yes
REC114	-0.819279	1.28853		yes
VNX1	-0.718696	1.29125		yes
SPO1	-1.04499	1.38613		yes
YSR3	-0.63069	1.40116		yes
ZIP1	-1.33327	1.41622		yes
RNH201	-0.924046	1.4189		yes
PDS5	-0.859358	1.44315		yes
MSH5	-1.56309	1.47399		yes
CWH41	-0.492945	1.49781		yes
DMC1	-1.71692	1.5738		yes
NUS1	-1.3537	1.62044		yes
RNP1	-1.43512	1.6383		yes
REC8	-1.58383	1.68609		yes
BUB3	-0.82447	1.68609		yes
HED1	-1.4686	1.7041		yes
RMA1	-0.844953	1.71107		yes
YCR061W	-0.676967	1.72654		yes
SPO16	-1.53049	1.88157		yes
REC102	-1.46365	2.0249		yes
NDJ1	-1.69363	2.03079		yes
PRD1	-1.12162	2.03362		yes
PCH2	-1.56307	2.08134		yes
SAE3	-1.45613	2.10306		yes
CSM4	-1.59559	2.15092		yes
SPO13	-1.67109	2.17035		yes
POL2	-0.944797	2.20094		yes
RED1	-1.46567	2.20258		yes
YIR016W	-0.865153	2.23366		yes
SPO11	-1.89692	2.46411		yes
HOP1	-1.61322	2.51745		yes
MER1	-1.63344	2.71843		yes
FKS3	-1.50367	2.87853		yes
MND1	-1.52323	3.08753		yes
MEK1	-2.15182	3.24013		yes
SCC2	-1.47206	3.46869		yes
MEI4	-1.56208	3.85195		yes
SWE1	-0.43917	0.50579		yes	yes
TOS4	-0.949258	1.26017		yes	yes
YBL029W	-0.00127404	0.00085676			yes
HO	-0.049637	0.0252274			yes
NUD1	0.053193	0.0416977			yes
SCW4	-0.0709139	0.0416977			yes
NAN1	-0.0923875	0.0455222			yes
TOS3	0.0739986	0.0475008			yes
LAC1	0.0877179	0.0498095			yes
AGP1	0.181059	0.0507377			yes
PPN1	0.102146	0.0570219			yes
YPS3	0.0690105	0.0602017			yes
ZEO1	-0.149371	0.0782048			yes
HHO1	-0.172319	0.090742			yes
GTB1	0.0950403	0.0932801			yes
HTZ1	-0.151815	0.0975048			yes
PRY1	-0.114036	0.124214			yes
YDL183C	-0.1776	0.125803			yes
SED1	0.117094	0.130791			yes
CAP1	-0.154032	0.135387			yes
PIL1	0.145603	0.139724			yes
YSY6	0.257054	0.147518			yes
YAT1	0.311179	0.150151			yes
GIC1	0.231496	0.15352			yes
PET54	-0.207209	0.15849			yes
EXO5	0.275588	0.165948			yes
MNN5	0.155327	0.175044			yes
MIT1	-0.191004	0.185089			yes
PET9	-0.256115	0.185598			yes
CBF2	-0.185721	0.188578			yes
IPT1	-0.218722	0.195576			yes
RPL37A	0.436144	0.19859			yes
GAT2	0.237409	0.211035			yes
SOK2	0.247134	0.218629			yes
POG1	0.195296	0.233323			yes
SLM4	-0.208337	0.246714			yes
KRE6	0.27107	0.25128			yes
SNF11	-0.320367	0.262204			yes
BBP1	-0.331636	0.265596			yes
BUD9	0.302733	0.265596			yes
RPL18B	0.312968	0.271914			yes
ENV9	0.270952	0.276839			yes
HOG1	-0.240902	0.282102			yes
SPB1	0.576691	0.288723			yes
AQR1	0.414617	0.298371			yes
CLN3	0.284446	0.299942			yes
AMF1	0.273069	0.332452			yes
TOK1	0.317916	0.337095			yes
YGR153W	0.381613	0.351335			yes
HSL1	0.304821	0.435583			yes
KCH1	0.361323	0.437151			yes
YOX1	0.409492	0.458048			yes
RSR1	-0.323996	0.460133			yes
SPO20	-0.617828	0.46643			yes
ERG4	0.506441	0.49204			yes
CLA4	-0.411778	0.528177			yes
UTR2	0.608995	0.532182			yes
SUR1	0.408841	0.58085			yes
PDR1	-0.337119	0.605865			yes
PCL2	0.419621	0.60965			yes
PTH4	-0.817283	0.650562			yes
CWP1	0.794181	0.739417			yes
SIM1	0.436644	0.785744			yes
HXT3	0.534965	0.872356			yes
YBR071W	0.486117	0.873725			yes
LYS20	0.858688	0.937631			yes
PMC1	-0.398227	0.937631			yes
ALG14	-0.623173	0.959978			yes
PLB3	-0.584058	1.01367			yes
FKS1	0.877091	1.18434			yes
ECM33	0.877237	1.18629			yes
GFA1	-0.65145	1.20795			yes
YOR342C	0.646866	1.21876			yes
NDD1	-0.703541	1.31119			yes
TOS2	0.619776	1.31598			yes
YKR011C	-0.792434	1.71247			yes
ERG11	0.983266	1.90043			yes
LTE1	-0.694069	1.92017			yes
RAX2	1.16877	2.08253			yes
AGE1	0.927699	2.15092			yes
TYE7	0.730022	2.19002			yes
SFG1	0.834935	2.46907			yes
GIC2	0.847594	2.51115			yes
SRL1	2.23154	2.84656			yes
CCW12	0.96405	2.87853			yes
SKM1	0.750894	2.8844			yes
PLM2	-0.947819	2.88711			yes
MSB2	0.833308	3.19659			yes
CLB2	1.11642	3.38079			yes
GAS1	1.20733	3.99657			yes
TOS8	1.41896	3.99657			yes
PDR16	1.01563	4.31179			yes
UTH1	-1.13563	4.35044			yes
SVS1	1.64096	4.46477			yes
CWP2	1.27383	6.10169			yes
CIS3	2.55408	7.488			yes
CLN2	1.33289	11.2236			yes
YOL019W	1.42723	11.848			yes
YHP1	2.10588	12.2719			yes
CRH1	1.57052	12.8151			yes
CLN1	2.67924	15.7617			yes
CSI2	2.32849	30.3063			yes
PCL1	3.89295	48.1021			yes
TOS6	3.9951	48.8149			yes
DAL4	-3.37504	0.972819
PRM6	-3.10667	0.988559
LEU2	-2.93395	0.934916
DAL1	-2.87009	3.06494
DBP2	-2.15422	0.709102
FIG1	-2.09809	1.23301
LDS1	-2.07998	1.56864
DUR3	-1.96465	1.44315
DAL80	-1.8664	1.21536
ANS1	-1.81198	2.94912
MNE1	-1.79665	4.84901
YGL138C	-1.78315	0.557125
VEL1	-1.77921	4.17045
GMC2	-1.77871	1.25434
MPC54	-1.76323	2.38491
YDL007C-A	-1.75925	1.40217
HHF1	-1.75562	1.49427
YPR027C	-1.73451	2.46907
SPO22	-1.72751	1.96342
DAL7	-1.71356	0.430822
YKR005C	-1.70425	2.181
YDR042C	-1.69791	2.87853
IME2	-1.69277	2.9872
DUR1,2	-1.67583	0.451578
HTA2	-1.6642	3.34244
AMA1	-1.63291	1.93749
OSW1	-1.60803	0.271802
ARO10	-1.5749	4.08398
SLZ1	-1.54096	1.63652
ARO9	-1.53954	3.00352
HTB2	-1.52719	1.73226
HTA1	-1.52652	3.59673
SPR28	-1.52406	2.94912
YMR244W	-1.51321	0.914005
YBR184W	-1.4782	1.47482
YJR161C/YDL248W	-1.46335	4.32357
SPO23	-1.46025	3.73432
MF(ALPHA)1	-1.43203	1.6383
HOP2	-1.42522	1.8202
RRT5	-1.41977	1.26017
AGA2	-1.41811	3.99657
PHO92	-1.36789	3.38741
YCL021W-A	-1.3495	1.69327
SRT1	-1.34129	2.45082
YKL065W-A	-1.33512	0.999742
HXT10	-1.32512	0.768674
PIG1	-1.30514	2.43911
HHT1	-1.30315	1.9731
FOX2	-1.30164	2.08134
HFM1	-1.29647	2.22061
YKR041W	-1.2791	1.4189
FHN1	-1.27804	1.20707
GAL10	-1.25652	2.85013
REC104	-1.24937	1.73469
ULP2	-1.22595	2.6473
KIN2	-1.22336	1.75692
GMC1	-1.20454	1.8662
TUB2	-1.20154	2.09085
WIP1	-1.20065	3.21636
PBP2	-1.18842	1.48873
GAL1	-1.18454	1.73155
SPS1	-1.18159	1.84714
RIM4	-1.17515	2.08134
YHR173C	-1.17294	1.38935
NCA3	-1.16951	2.71843
MPS2	-1.16009	1.14951
HUG1	-1.15782	0.648292
POX1	-1.15762	1.30572
APL4	-1.15681	3.34932
SPR3	-1.12667	0.889266
RRN6	-1.11825	2.8506
CLB5	-1.11271	1.68184
MCM5	-1.10649	2.88711
PXA1	-1.10588	2.32506
YIG1	-1.1019	1.98305
DTR1	-1.09328	1.72898
FAA2	-1.09237	4.69309
SRS2	-1.08932	4.11332
YPL199C	-1.08773	1.29125
IPL1	-1.08579	1.60531
RRN11	-1.0824	2.09999
CSM2	-1.07478	1.28288
SPC97	-1.07255	1.51311
BTS1	-1.07243	2.04775
SPC29	-1.07048	1.5632
MCH1	-1.06793	3.98348
GIP2	-1.06558	0.931158
CUZ1	-1.06557	1.40288
ADY3	-1.06288	2.8844
SPO19	-1.06048	1.22311
DAL5	-1.05449	0.677068
RRN5	-1.05233	1.39745
ISU2	-1.05092	1.50857
INA1	-1.04981	0.953591
SPS18	-1.04913	1.71357
DCG1	-1.04731	0.915598
YMR147W	-1.04384	1.16043
CIK1	-1.04056	1.35566
YNR014W	-1.03869	3.23974
ECM23	-1.03021	1.96342
SWM1	-1.0266	1.0731
SAS2	-1.01553	2.22217
HTB1	-1.01477	1.12351
DIF1	-1.00883	1.6383
MCH2	-1.00456	3.38079
UME6	-1.00037	1.17398
OSW5	-0.998072	1.68184
FMT1	-0.994818	1.38469
PXL1	-0.994379	1.56864
SEC61	-0.978949	1.88438
AFB1	-0.972611	0.935995
MLH3	-0.968715	1.44506
STU1	-0.965189	1.72898
YHR127W	-0.962938	1.70051
PDS1	-0.962466	0.798502
SGS1	-0.955843	1.1268
HSP82	-0.955358	1.54167
PRM3	-0.955269	1.39325
HHT2	-0.952604	0.739282
SMC3	-0.945513	0.878834
YJR056C	-0.938765	1.44315
ATP10	-0.937245	1.72654
CDA1	-0.934329	0.688588
YAL068C/YJL223C	-0.933922	0.471848
GAT4	-0.929625	0.160692
CAR1	-0.923835	2.87853
PRE2	-0.920551	1.25577
BOI2	-0.918852	1.76741
CSE1	-0.915508	2.46907
ECM29	-0.914659	3.15408
HUL4	-0.910719	2.19002
RET3	-0.910381	1.30031
ELO2	-0.90488	1.30991
GDT1	-0.90474	1.94237
CRP1	-0.902142	0.780866
PCD1	-0.901107	0.652839
IRR1	-0.90091	1.1975
DAS1	-0.900883	2.35148
MMS1	-0.900811	1.71492
CDC9	-0.900563	2.38491
CKS1	-0.894148	1.21477
FMP52	-0.892914	1.94237
YFL012W	-0.891392	0.228008
POT1	-0.889934	1.1975
SPR2	-0.887315	0.676654
YPK1	-0.887087	1.90043
KAR2	-0.88265	2.23831
UBC5	-0.882027	1.62044
YHR202W	-0.878682	1.22311
HRP1	-0.877167	1.61247
YOR387C	-0.873631	1.64974
SMC1	-0.872793	0.902877
PXA2	-0.872052	1.98797
FCP1	-0.87089	1.52904
INO1	-0.869567	3.99657
GAS4	-0.869022	0.441758
PDI1	-0.867498	1.21226
YDL211C	-0.867079	1.15623
PUP3	-0.866834	1.17
PES4	-0.866746	1.01685
COS8	-0.864396	1.40541
RRG8	-0.862616	1.42998
GCV1	-0.859498	0.606081
UNG1	-0.857997	0.605471
TIR1	-0.857557	2.38491
CUE4	-0.854474	2.06748
HEK2	-0.852762	0.878834
CIN1	-0.848623	2.71451
CSM3	-0.847624	1.33122
YJL043W	-0.846961	0.607283
SPC34	-0.846725	0.724351
ARE2	-0.840927	1.60531
YSW1	-0.840802	1.72898
SWI1	-0.840714	2.02524
DON1	-0.8404	0.88872
BOI1	-0.840129	1.79075
DCI1	-0.839168	1.93749
ASG7	-0.836718	1.01808
ALG5	-0.836331	1.06304
PAC11	-0.834304	0.732622
RSB1	-0.833939	2.20094
DDC1	-0.833203	1.23083
RTT10	-0.831143	2.87853
PIF1	-0.830703	1.06793
MPD1	-0.828435	1.93392
KIP3	-0.823928	1.44575
MYO2	-0.821805	1.98427
OGG1	-0.821582	1.03108
CDC7	-0.816297	0.827461
SCT1	-0.815902	2.0881
YGR035C	-0.815489	0.529227
BEM4	-0.813342	1.40459
SAE2	-0.809098	0.732622
GLO4	-0.807852	1.21876
TOP3	-0.807745	2.36767
ITR2	-0.807462	1.87251
QDR2	-0.804167	2.3175
PUS2	-0.804142	0.841253
NTH2	-0.799257	1.08627
YDL199C	-0.798661	1.01685
BAT1	-0.798473	0.394675
DBF4	-0.794139	0.827461
UPS3	-0.793543	1.61271
STT3	-0.791836	1.84714
USB1	-0.790503	0.827929
DUG2	-0.789926	0.903953
RAD52	-0.78909	0.960322
PMT2	-0.787824	1.93619
GPI13	-0.78761	2.09085
MCD4	-0.785504	1.36676
VPS1	-0.783594	1.06931
PRE3	-0.783036	1.8202
RPO41	-0.78262	2.03362
ALY2	-0.778622	1.09646
PRE10	-0.778332	0.691215
RPN8	-0.777181	1.01685
YLR446W	-0.77667	0.873725
GCV2	-0.776046	2.23569
INP52	-0.774009	2.20094
PGA3	-0.773882	2.01243
PRB1	-0.773546	1.39451
GEX2	-0.771863	1.40116
ATG8	-0.769042	0.50965
MAM1	-0.767264	0.529473
PFS1	-0.767161	0.0614718
YOL057W	-0.765803	0.878834
YER085C	-0.764715	0.333064
ALP1	-0.762185	1.30875
MIS1	-0.761719	1.40116
RPT2	-0.760292	0.742459
SEC66	-0.759748	0.765359
IME1	-0.759028	3.10788
YGL036W	-0.75629	2.05516
HUA2	-0.753671	0.99288
OLE1	-0.753609	1.1268
NEL1	-0.752856	0.988559
CDC28	-0.752814	1.09646
GAS3	-0.752578	1.11086
UGA4	-0.752162	0.987744
GAT1	-0.750572	1.20707
YDL114W	-0.748015	0.394675
RIF1	-0.744377	1.30521
BTN2	-0.744034	0.954036
YJL118W	-0.74392	0.529227
VPS73	-0.743068	1.48568
DAN1	-0.742678	1.63115
RDH54	-0.74224	1.28137
YGL262W	-0.740891	0.838529
RPT4	-0.740128	0.767863
APD1	-0.738401	0.740525
TRA1	-0.735706	3.34932
YOL131W	-0.735364	0.524109
RFA1	-0.733724	1.31168
ULI1	-0.733637	1.23478
NDC80	-0.732186	2.02544
SEI1	-0.731671	1.30182
COQ4	-0.731041	0.90356
ERP2	-0.730881	1.1975
PPG1	-0.730866	1.01192
ALF1	-0.729563	0.575641
YHI9	-0.724058	0.615591
LSC2	-0.723482	1.05698
LHS1	-0.722456	1.39773
YSP3	-0.722194	1.71107
NAT4	-0.719169	0.45701
MNN9	-0.718513	1.21876
NET1	-0.717195	2.08425
SPC24	-0.716157	0.732622
PET8	-0.714956	1.54788
UBR2	-0.714185	1.12188
MCT1	-0.713411	2.19515
RPN7	-0.712724	0.809595
ATG18	-0.712712	1.01167
YGR273C	-0.710025	0.164169
HSP31	-0.709443	1.70051
YPL113C	-0.708554	0.735055
YNR071C	-0.708118	0.74297
RNH202	-0.707733	0.605471
MEC3	-0.706621	0.638173
STE3	-0.706284	0.442044
RPL15B	-0.704385	0.52673
EMP24	-0.702937	0.878834
CTF3	-0.702676	1.59553
SLI15	-0.701729	1.11187
GEA2	-0.700735	2.37735
TIR4	-0.698491	0.970927
MRN1	-0.697947	0.771767
HXT8	-0.696866	1.15945
MIP6	-0.696238	1.08627
TRS23	-0.694665	0.666559
CMR1	-0.694558	0.842325
CDA2	-0.694153	0.300492
NPL4	-0.693543	0.873725
PCK1	-0.690946	0.832642
DBP1	-0.689561	1.10781
REH1	-0.689489	1.22311
RFA2	-0.689024	0.735107
AQY2	-0.688378	0.49204
WHI5	-0.688054	0.662782
SGO1	-0.687411	0.640014
PMT4	-0.686332	1.5358
GAL83	-0.685402	0.680966
DUT1	-0.683916	0.92704
RPN12	-0.68295	1.16043
OXA1	-0.681411	0.92543
BNA4	-0.680901	1.45122
IRC10	-0.679912	0.707969
ALD5	-0.678883	0.117044
MSI1	-0.677611	1.47759
APC4	-0.67675	0.98104
TUB3	-0.676612	1.13874
RTS2	-0.676128	0.433485
EXO1	-0.676111	0.857988
GIS3	-0.674009	1.03812
SCS3	-0.672319	1.09571
ASF2	-0.671401	0.695474
BTT1	-0.671189	0.648292
MTR3	-0.67019	2.00307
VPS53	-0.670004	1.21876
PRI1	-0.667845	0.92163
GAL2	-0.667345	1.28512
BUL2	-0.667156	2.07437
IRC22	-0.664698	1.40541
SRO7	-0.66271	1.06343
RPT3	-0.66192	0.714968
LSO1	-0.661851	0.318546
THI4	-0.659785	0.561862
RPT1	-0.65961	0.836931
MGA2	-0.659577	0.677593
RDI1	-0.65946	1.40288
GEX1	-0.653802	0.414998
SSE2	-0.652109	0.921354
MIH1	-0.65071	0.894716
DMA1	-0.650659	1.13874
SET1	-0.650609	1.21876
COS9	-0.650181	0.648102
CAR2	-0.650135	0.532182
YLR049C	-0.648294	1.34808
PRE6	-0.647879	0.459943
PRE9	-0.64548	0.619012
CPS1	-0.643168	0.54728
YKL134C	-0.64292	0.614598
CDC50	-0.64264	1.13299
AAH1	-0.642358	0.419102
PRE5	-0.642167	0.642552
PRE8	-0.641484	0.610731
YOR012W	-0.641143	0.801177
BDF2	-0.640201	1.28263
SMA1	-0.639387	0.701885
ACB1	-0.639115	0.669077
PCP1	-0.638772	0.663598
CDC3	-0.637978	0.730132
COP1	-0.637813	1.70665
PIR3	-0.637807	0.758774
YER152C	-0.637578	1.05698
RMT2	-0.637139	0.370239
BMH2	-0.636311	1.09051
SNF2	-0.635538	1.12937
KTR2	-0.633254	0.669077
ERV25	-0.633072	0.933489
IGD1	-0.630236	0.903544
HXT14	-0.630152	0.418875
FAA4	-0.629662	0.663598
SPO74	-0.628432	0.283801
YVC1	-0.627357	1.04148
YIL102C	-0.626315	0.411987
PAU10	-0.626177	0.0564168
LPX1	-0.625985	0.677068
PEX9	-0.625067	1.1975
RPN6	-0.62494	0.688588
SWI3	-0.623858	0.788454
ABF1	-0.623311	0.848084
IZH2	-0.622138	0.929339
RHO2	-0.621124	0.811585
RAD23	-0.618819	0.755409
FDO1	-0.617539	0.947866
BUD21	-0.617473	0.601562
MGR3	-0.616761	0.649512
YGL176C	-0.61573	1.06343
HST1	-0.615316	1.01909
PEX17	-0.614462	1.13174
RBH2	-0.612704	0.967924
AUS1	-0.611752	1.08806
KIP1	-0.611015	1.34009
SPC105	-0.610817	0.574711
MGM101	-0.610537	0.669077
HES1	-0.610471	0.20415
STU2	-0.609634	0.669315
APC9	-0.607665	0.478887
RNH1	-0.606616	1.1175
RPL22A	-0.604896	0.302248
URH1	-0.60404	1.1668
MUM2	-0.60169	0.474266
MCM3	-0.601001	1.87373
SHE4	-0.600988	1.09405
POL12	-0.600979	0.733748
MDS3	-0.597811	0.915598
MEC1	-0.597187	1.49529
HFA1	-0.597081	1.39451
PEX31	-0.596919	0.916701
MGR1	-0.596888	0.871204
YBR090C	-0.596327	0.271969
YGL261C/YIL176C	-0.596229	0.301119
YML053C	-0.595289	0.405826
RAP1	-0.594985	0.929339
SBA1	-0.594136	0.548615
YMR196W	-0.593484	0.958457
EOS1	-0.592534	1.57939
ERP3	-0.592483	0.848084
FTH1	-0.590652	1.30243
IZH1	-0.590399	1.28839
RTT107	-0.590128	0.903953
LSB5	-0.589685	0.560331
YDR444W	-0.589103	0.54728
PKH2	-0.588784	1.02792
YOR114W	-0.588503	1.41978
MSS51	-0.588441	1.1841
YBP2	-0.586215	1.60231
GET3	-0.585728	0.947076
YHL026C	-0.585294	1.03812
LCB1	-0.584537	0.983865
GSY1	-0.584284	1.2008
YMR279C	-0.584093	1.17055
FET5	-0.584082	1.27671
RPC53	-0.583341	1.40877
TPO4	-0.58319	0.983696
YNL165W	-0.582915	0.762415
SHO1	-0.581789	0.657357
UMP1	-0.580082	0.506041
CDC48	-0.579823	0.836931
YNR048W	-0.579153	0.902877
MFG1	-0.578845	0.796435
STE24	-0.576274	0.693463
YHL008C	-0.575769	0.65789
SUT1	-0.575237	0.54728
RPN1	-0.575154	0.756779
SCL1	-0.575122	0.836931
YAP1802	-0.573798	0.82432
PIG2	-0.573548	0.66697
PUG1	-0.573245	0.383164
RKM5	-0.572778	0.715562
PMT1	-0.572462	0.919283
YOR1	-0.571993	1.71107
SWC5	-0.571556	0.435583
POL31	-0.571532	0.577642
NRM1	-0.570116	0.624204
YCP4	-0.569926	0.649142
YCL048W-A	-0.566389	0.435041
YLR030W	-0.566234	1.37391
SHE1	-0.566216	0.614598
RBK1	-0.565676	0.840204
IMG2	-0.565309	0.50957
CAC2	-0.565213	0.600613
XKS1	-0.563082	1.11377
TPH3	-0.561596	0.634443
IKS1	-0.561547	0.689498
PRE4	-0.561227	0.74297
MDM20	-0.560762	1.21876
PCA1	-0.560298	0.764768
IZH4	-0.559718	0.367942
DPB4	-0.558727	0.730132
YGR201C	-0.557021	0.673413
PDR10	-0.556345	1.74272
CKA2	-0.55446	0.651642
YGL015C	-0.553194	0.276797
PUT2	-0.552442	1.5738
LGE1	-0.55165	0.493466
GCS1	-0.551097	0.728921
VMA16	-0.549041	1.57572
SBP1	-0.548024	0.529227
YPL068C	-0.546959	0.732095
YLR118C	-0.546262	0.667872
SSU72	-0.545045	0.748576
UFD1	-0.544724	0.688588
PCL7	-0.543609	1.26614
PTI1	-0.543441	0.669077
SHC1	-0.543308	1.25959
YIL024C	-0.543007	0.471036
HAP2	-0.542677	0.572412
DAL3	-0.54254	0.39868
ATG13	-0.54227	0.764627
YHR033W	-0.542176	0.731728
YOL024W	-0.542006	0.171989
COS6	-0.54187	0.477757
RTT109	-0.540561	0.679481
KAR4	-0.538989	0.657368
RSF1	-0.538808	0.735252
CDC53	-0.537962	0.856208
TEM1	-0.537738	0.479623
ECI1	-0.537414	0.40328
QRI1	-0.53641	0.496474
MDY2	-0.535741	0.650562
BOR1	-0.533483	1.40116
BNR1	-0.532326	0.965368
SCC4	-0.531923	0.860009
YPR097W	-0.531843	0.691215
RPN9	-0.531247	0.818378
BOS1	-0.530017	0.737738
PRM9	-0.530005	0.562335
LSM5	-0.528747	0.548615
ARC1	-0.528539	0.976828
IMD4	-0.528172	0.411265
HST2	-0.527916	1.01439
MAK3	-0.527573	0.310695
HST4	-0.527466	0.562335
PGM2	-0.526901	0.818202
URA7	-0.526897	0.185296
RPN3	-0.52686	0.728313
YDL012C	-0.525511	0.286822
RPN2	-0.525445	0.648292
CLF1	-0.523675	0.462803
SSP2	-0.521524	0.529227
DDI1	-0.520973	0.494715
YFR018C	-0.520512	0.677593
TES1	-0.520228	0.973778
ECM38	-0.519367	0.540571
YPR071W	-0.518692	0.942309
PAU13	-0.518393	0.325486
BLM10	-0.517764	1.1341
KAP120	-0.516504	1.50857
DGR2	-0.516073	0.891131
RPT5	-0.515797	0.764627
YGK3	-0.515443	0.902877
CDC23	-0.51512	0.768876
FAR11	-0.515008	1.04629
URK1	-0.514465	0.343679
MCY1	-0.513855	0.652576
TOP2	-0.513647	0.756779
SPE3	-0.512829	1.03046
DPM1	-0.512768	0.669077
YBR062C	-0.512101	0.563917
FAR3	-0.512071	0.747984
SSH1	-0.511307	0.565819
SLK19	-0.511161	0.554449
CDC4	-0.511065	1.27671
RPN5	-0.51065	0.57756
ALG7	-0.509443	0.514117
GAA1	-0.508828	0.741341
MCH4	-0.508803	0.435583
GPI16	-0.507389	0.579356
MIP1	-0.506793	0.894143
CLB3	-0.506325	0.669077
MUB1	-0.505286	0.657368
MRPL4	-0.504778	0.785744
SPE2	-0.503973	0.485357
CDC14	-0.5038	0.703172
EEB1	-0.503702	0.60451
DMA2	-0.503566	0.833548
ACS1	-0.501844	0.345752
YUH1	-0.501835	0.477611
PHS1	-0.500901	0.809438
HUL5	-0.499938	1.23363
TIM12	-0.499439	0.695474
PIR5	-0.498403	0.741341
RTS3	-0.498283	0.296454
MPS3	-0.496919	1.40116
REC107	-0.495121	0.305752
PRO3	-0.494044	0.576699
ATG32	-0.493664	1.28982
CKB2	-0.49322	0.804375
YDR090C	-0.493081	0.91339
TMA17	-0.492457	0.30306
MEF2	-0.492286	0.570074
ATG39	-0.491946	0.677593
CIP1	-0.491867	0.559184
TAZ1	-0.491856	0.746332
SHP1	-0.491613	0.624204
DIS3	-0.491526	1.26417
HEM15	-0.491465	0.706389
GCV3	-0.49065	0.302483
FSF1	-0.490624	0.915598
ADD66	-0.489699	0.543795
TVP15	-0.489392	0.571552
YAL037W	-0.488978	0.702123
SRP102	-0.488076	0.599794
CSF1	-0.487872	1.28263
TGL2	-0.48781	0.353899
DSK2	-0.487727	0.496474
CST26	-0.487713	0.978566
TDA5	-0.486555	0.697734
DAM1	-0.485853	0.555525
YIL067C	-0.485117	1.05698
EFM6	-0.48496	0.276839
SRL4	-0.484246	0.233323
PGD1	-0.483931	0.478688
RAD16	-0.483806	1.372
CSM1	-0.483321	0.276839
DIG2	-0.483117	0.373442
MUM3	-0.482918	0.428439
RFA3	-0.482519	0.507409
SLI1	-0.481917	0.687079
SCS22	-0.481305	0.333013
ATG2	-0.480821	0.984191
PTP1	-0.480638	0.462355
PAN2	-0.480074	0.676654
RFC3	-0.480058	0.442478
ATG1	-0.479726	0.742459
PRS1	-0.478701	0.571552
TIR3	-0.477982	0.750597
SEC31	-0.477724	0.669477
VPS30	-0.477479	1.01367
RAD59	-0.476982	0.396515
PUP1	-0.476518	0.479623
HSP30	-0.476374	0.45701
ATG27	-0.475529	0.679481
IRC18	-0.474928	0.275271
BUD13	-0.474774	0.383164
UBC9	-0.474295	0.903544
ADY2	-0.473964	0.341346
ALD4	-0.473094	0.503795
HEM14	-0.472844	0.46072
GLG2	-0.4719	0.357131
PEX11	-0.471409	0.742453
RTG1	-0.470638	0.414998
YKL162C	-0.470583	0.511887
FPS1	-0.469924	0.669477
DOA1	-0.469504	0.472862
ERP5	-0.469315	0.745966
SHS1	-0.469127	0.540855
PRP43	-0.469087	0.264266
YBR096W	-0.468452	0.529227
SMT3	-0.46827	0.582509
NPP2	-0.468215	0.648102
YGR015C	-0.467483	0.451578
BFR1	-0.467096	0.751166
SMA2	-0.466889	0.387313
UBP6	-0.466607	0.901108
YOR019W	-0.466026	0.764627
SVF1	-0.463292	0.439944
PUP2	-0.461664	0.414998
HIF1	-0.461488	0.428599
MSC6	-0.461143	0.532182
DUO1	-0.46014	0.347289
VID22	-0.459502	0.947669
YOL036W	-0.458895	0.578042
RME1	-0.458524	0.377505
YBR285W	-0.457905	0.34956
AFI1	-0.455888	0.745345
SCO1	-0.455265	0.444958
ECM8	-0.45476	0.568826
YAP3	-0.454483	0.642648
MCM2	-0.454326	0.522029
GID7	-0.454177	0.516755
HSP42	-0.453359	0.493068
ICT1	-0.452884	0.732681
CDC11	-0.451805	0.450568
SWD3	-0.451335	0.734799
KEG1	-0.450219	0.540571
CSE4	-0.450193	0.301046
PHO88	-0.450142	0.617668
SCJ1	-0.450091	0.458074
PRE7	-0.449547	0.347289
IOC3	-0.449315	0.765084
SCP160	-0.449	1.07558
PUT3	-0.44837	0.679481
YPT11	-0.447794	0.631962
PMT5	-0.447314	0.614598
KAR3	-0.446308	0.441479
PGA2	-0.44525	0.513209
YDR391C	-0.444967	0.854909
YGR111W	-0.443892	0.348098
MCK1	-0.443533	0.637505
PEP4	-0.443504	0.454546
MET12	-0.442816	0.742417
YLH47	-0.442806	0.407954
DPL1	-0.441815	0.676654
STR3	-0.441458	0.160655
NHP6A	-0.440624	0.517176
SAM50	-0.440374	0.384517
FAT1	-0.43847	0.85404
NUP49	-0.437803	0.449654
VHS2	-0.437616	0.417874
PAN3	-0.436969	0.574711
YCH1	-0.436869	0.299867
ELG1	-0.435766	0.624204
YJR096W	-0.434955	0.587132
YER010C	-0.434251	0.498868
RSE1	-0.43393	0.640014
OST1	-0.433204	0.729693
TSA2	-0.433035	0.230465
AMD2	-0.43274	0.571215
RTT105	-0.432681	0.780866
ATG7	-0.432469	0.387313
PDC5	-0.431926	0.344309
CIN2	-0.431278	0.764627
ARO7	-0.430547	0.570285
UBX2	-0.429894	0.590986
COX16	-0.429745	0.649056
CDC10	-0.429384	0.507045
RFX1	-0.429229	0.324927
COX19	-0.429185	0.437151
LRO1	-0.428751	0.493466
SEC23	-0.428608	0.619146
ALT2	-0.428542	0.40466
BIM1	-0.428498	0.299156
HRD1	-0.42844	0.566419
YPR145C-A	-0.428191	0.26899
AVT1	-0.42819	0.677593
UBC4	-0.427948	0.301417
POP4	-0.427716	0.921358
MOT1	-0.426781	0.678549
RAD51	-0.426505	0.864643
BDF1	-0.425895	0.477757
SHE2	-0.424793	0.574711
TEL2	-0.424206	0.512968
RCN2	-0.42415	0.54929
GET4	-0.423913	0.330942
PRP28	-0.4239	0.606263
ENA1	-0.423725	0.191905
AAT2	-0.423436	0.29494
LEM3	-0.422933	0.612266
VHR2	-0.420636	0.320198
CTA1	-0.419702	0.501668
TAH11	-0.41956	0.76412
GDI1	-0.418809	0.377543
YKT6	-0.418788	0.473788
SEC24	-0.418459	0.809982
URA8	-0.418136	0.765359
OAF1	-0.418136	0.566497
AAC3	-0.417025	0.312198
RAD17	-0.41672	0.326355
PUN1	-0.415207	0.745345
PMI40	-0.415106	0.590027
PEA2	-0.414897	0.373357
TOM40	-0.41407	0.345752
NDC1	-0.413527	0.487498
GAS2	-0.413242	0.302273
ISN1	-0.412793	0.419465
TUB4	-0.41247	0.547801
PAN5	-0.411515	0.81518
PPT1	-0.411461	0.470501
POL5	-0.411122	0.915598
CTF18	-0.410832	0.503035
RET2	-0.410764	0.567353
LCB2	-0.410474	0.795456
YLR177W	-0.410154	0.493466
AFR1	-0.409559	0.725438
YIP3	-0.409516	0.468444
ATG34	-0.409509	0.529227
KHA1	-0.409051	0.669077
UBX4	-0.408006	0.364334
TRR1	-0.407879	0.678549
IML3	-0.40762	0.564956
CNM67	-0.407413	0.504771
PAU4	-0.407015	0.210495
UBC6	-0.405755	0.337408
SNX4	-0.405028	0.449654
ERP4	-0.404235	0.392664
ALD2	-0.403716	0.493466
HSV2	-0.401543	0.475426
NIT2	-0.401412	0.449654
SAF1	-0.400364	0.37277
IDH1	-0.39994	0.92163
POB3	-0.399835	0.487498
RPN10	-0.399794	0.302483
HMLALPHA1	-0.399607	0.296454
HYM1	-0.399567	0.564247
ELP4	-0.397829	0.615422
CDC1	-0.397479	0.608756
EMC2	-0.397184	0.458048
STB3	-0.396941	0.507134
RHO4	-0.396889	0.612127
POL30	-0.396835	0.291743
NMA111	-0.3966	0.761731
ISC1	-0.395063	0.494715
SKO1	-0.394775	0.735055
ROX3	-0.394649	0.337408
YPR063C	-0.394047	0.681124
LCD1	-0.394015	0.514676
TSC3	-0.393968	0.574711
SHE3	-0.392273	0.394675
YPT32	-0.391201	0.360932
POL32	-0.391086	0.46072
DBP5	-0.390983	0.481826
TOF2	-0.389751	0.780866
YPR174C	-0.389318	0.279172
SLY1	-0.389073	0.417188
YLR126C	-0.388592	0.57756
MSH2	-0.38843	0.467032
PRE1	-0.387678	0.611752
DHH1	-0.387571	0.567353
VRG4	-0.387533	0.435041
BDH2	-0.387375	0.2537
UBI4	-0.38681	0.529227
TPM2	-0.386427	0.329046
BNA5	-0.386298	0.54728
YEL025C	-0.385504	0.764627
LAG1	-0.385327	0.458048
RIM101	-0.385079	0.290648
MGL2	-0.38384	0.494483
GAP1	-0.383101	0.237855
GRH1	-0.382941	0.37682
FUN19	-0.38286	0.468444
CSS3	-0.382857	0.432415
BCS1	-0.382113	0.650615
SSM4	-0.381713	0.923964
CUP2	-0.381695	0.428599
CDC13	-0.381473	0.598811
PHB2	-0.381156	0.299942
HER1	-0.381032	0.83073
AST1	-0.380861	0.305752
YLR149C	-0.380585	0.328085
YTA7	-0.379809	0.55355
YNL320W	-0.379602	0.337408
NUP57	-0.378482	0.503035
PEX21	-0.378428	0.194624
CAB1	-0.378131	0.494715
SPS100	-0.377713	0.1675
MIG3	-0.377682	0.407615
NHP6B	-0.377175	0.36177
CDC39	-0.376699	0.744993
DOT6	-0.376338	0.305752
STO1	-0.375956	0.459984
ZPS1	-0.374792	0.347289
YEL023C	-0.374516	0.411987
SWR1	-0.373234	0.480718
YHK8	-0.373046	0.233323
TMC1	-0.372573	0.437151
MCM16	-0.372076	0.449654
AFG3	-0.372067	0.58213
SPC98	-0.371733	0.479623
MCM6	-0.371717	0.710123
PTC7	-0.371476	0.414998
RKM1	-0.371323	0.435583
KEX2	-0.371302	0.542724
YGR125W	-0.371131	0.298371
BRN1	-0.370507	0.200625
ERG10	-0.368807	0.31847
FRT1	-0.368574	0.540855
SPC110	-0.367239	0.362339
KIC1	-0.367177	0.470501
BUB1	-0.366801	0.432284
SRX1	-0.36552	0.321223
NBP35	-0.365276	0.458074
VTC5	-0.364647	0.301417
ESP1	-0.364195	0.63308
AIM7	-0.363941	0.498125
YRB1	-0.363611	0.407047
GLC3	-0.363205	0.63308
MSL1	-0.36305	0.20415
VIK1	-0.362951	0.535253
KEX1	-0.362722	0.239575
FRQ1	-0.362622	0.507409
REV7	-0.362479	0.401248
SIR1	-0.361803	0.601227
ROT1	-0.361637	0.652287
NSG2	-0.361334	0.611752
YBR085C-A	-0.36126	0.240684
DCR2	-0.360919	0.481826
BRR6	-0.360867	0.454546
SNU71	-0.360698	0.287378
WSC2	-0.360044	0.553029
RAD54	-0.3596	0.430822
MIF2	-0.359397	0.405826
HUA1	-0.359116	0.417874
BRE5	-0.35866	0.344523
YPP1	-0.358324	0.714113
SRO77	-0.358015	0.55515
BXI1	-0.357038	0.558573
ICE2	-0.357028	0.614598
TUM1	-0.356968	0.394352
CCT5	-0.356949	0.60451
YHR182W	-0.356181	0.296454
TDA4	-0.356105	0.286822
AIM3	-0.3561	0.387313
MME1	-0.35608	0.394176
ANR2	-0.355942	0.594723
RRD2	-0.355793	0.562335
YAP1801	-0.355368	0.300492
CPR7	-0.354817	0.501852
VAC17	-0.353778	0.477611
TRM9	-0.353526	0.214519
RRT2	-0.3534	0.475914
ERD2	-0.353386	0.542392
SEC26	-0.353346	0.478015
ERF2	-0.353207	0.544138
CAX4	-0.352938	0.317131
YME1	-0.352399	0.408652
HSC82	-0.352028	0.634651
MRX8	-0.351611	0.40466
GLO3	-0.350591	0.370934
EAF1	-0.350439	0.377543
SPH1	-0.350388	0.586904
GDH1	-0.350323	0.260135
RAD57	-0.349962	0.529473
ZDS2	-0.349898	0.651413
NAT1	-0.349729	0.642552
TAO3	-0.349687	0.642552
NSP1	-0.349478	0.696721
YMR130W	-0.349366	0.530568
AZR1	-0.348883	0.481826
SOL4	-0.348609	0.436046
APT2	-0.348272	0.655517
PGM1	-0.348187	0.467032
UBA3	-0.348109	0.285416
ALK2	-0.347924	0.328274
HRR25	-0.347669	0.494152
KRE1	-0.347141	0.414998
AFT2	-0.347041	0.529227
PMT6	-0.346908	0.37277
TFB2	-0.346704	0.463073
CEX1	-0.346071	0.422307
BUD6	-0.345944	0.342351
ASK1	-0.345907	0.177851
LDB18	-0.345695	0.461692
CCT3	-0.345511	0.346388
JEM1	-0.345433	0.453622
OSW2	-0.344918	0.267498
AYR1	-0.344863	0.250303
TGL4	-0.344826	0.574822
RIM1	-0.344677	0.350914
VPS25	-0.34422	0.381444
AAC1	-0.343692	0.175044
ZRG8	-0.343147	0.305752
LSB3	-0.34281	0.440037
NAM7	-0.342753	0.524109
MCH5	-0.342108	0.529227
RPN13	-0.341932	0.477757
YSC83	-0.341443	0.648102
DBR1	-0.341164	0.49204
LPP1	-0.339606	0.305752
GEA1	-0.339527	0.614959
CUP1-2	-0.339362	0.151565
YCG1	-0.339098	0.393706
NPY1	-0.338702	0.590043
ALG2	-0.338486	0.366876
BAP2	-0.337937	0.167841
BAT2	-0.337777	0.60451
SOH1	-0.337683	0.251727
PFK26	-0.337618	0.487618
MEU1	-0.336046	0.382386
BET2	-0.33578	0.381242
FAB1	-0.33577	0.484899
GPP2	-0.335476	0.517919
UBC7	-0.335462	0.296454
ECM25	-0.335069	0.477611
MSN5	-0.334654	0.585357
XRN1	-0.333158	0.559133
HLR1	-0.332439	0.49324
CKI1	-0.332174	0.362667
YNL092W	-0.331649	0.507467
RPL27A	-0.33157	0.124214
EGH1	-0.33144	0.580601
MPC1	-0.331389	0.19859
SIA1	-0.330396	0.415853
YML037C	-0.330339	0.280865
SUB2	-0.33009	0.493466
GIP1	-0.329092	0.301417
TFA2	-0.3288	0.491474
HEM12	-0.328648	0.387313
SLN1	-0.328514	0.519285
NAM2	-0.328478	0.514676
PEX25	-0.328325	0.568627
CAD1	-0.327652	0.337095
UTR5	-0.327632	0.157763
DFR1	-0.327511	0.407734
PRM7	-0.327048	0.163339
RAD27	-0.326918	0.392664
UPC2	-0.326818	0.26887
SEC14	-0.326497	0.276839
NIC96	-0.326369	0.583269
YOR238W	-0.326179	0.297905
ARP9	-0.325832	0.414998
MFB1	-0.325332	0.387257
VPS17	-0.325243	0.583269
RAM1	-0.325157	0.403343
AHC2	-0.325117	0.353757
ADH2	-0.32457	0.124137
STB1	-0.32416	0.301417
YNL108C	-0.324021	0.325944
RIT1	-0.323543	0.377543
BRE2	-0.323056	0.384659
YOR338W	-0.323022	0.297263
ISW1	-0.322983	0.63308
RRM3	-0.322814	0.268741
YFL060C/YNL334C	-0.321698	0.264266
PTC5	-0.321502	0.414998
RFC5	-0.321461	0.264437
PHB1	-0.321455	0.261492
TYW3	-0.321231	0.271802
APC11	-0.32119	0.192782
MSA1	-0.320736	0.447859
GCD10	-0.320649	0.157822
GYP7	-0.320448	0.574822
YDJ1	-0.320426	0.55507
APE1	-0.320311	0.233252
BCK1	-0.320026	0.312198
YGL082W	-0.319968	0.280899
IME4	-0.319819	0.373822
EPT1	-0.319537	0.276839
YAE1	-0.319365	0.217139
CDC12	-0.318891	0.276839
OYE3	-0.318888	0.226388
CCT4	-0.318535	0.371802
MDJ1	-0.318304	0.301417
YGR127W	-0.318301	0.170983
FAT3	-0.317204	0.117044
HAS1	-0.316948	0.141067
ASI1	-0.316776	0.298064
SMM1	-0.316706	0.475426
PHO85	-0.31661	0.275012
DAS2	-0.316512	0.360932
IML1	-0.316455	0.524109
VAC14	-0.31603	0.324927
ADE16	-0.315507	0.398284
CIT3	-0.315005	0.131929
CDC15	-0.314993	0.546198
STH1	-0.31492	0.436046
PUF4	-0.314425	0.59223
YMR209C	-0.314311	0.422051
KTR3	-0.313928	0.38295
SPS19	-0.313845	0.183384
SEC62	-0.313791	0.294112
NUP192	-0.313787	0.49204
GAB1	-0.313675	0.231263
PUF3	-0.313538	0.471417
MNN10	-0.312657	0.435583
SLM3	-0.312434	0.241451
ORC1	-0.31225	0.345102
RVB1	-0.311977	0.329889
DNA2	-0.311524	0.324927
USA1	-0.311177	0.386481
SEC39	-0.310928	0.301417
YOR131C	-0.310904	0.484899
VAM6	-0.310878	0.449275
COX23	-0.310528	0.190254
SAL1	-0.310409	0.432302
TDA11	-0.310216	0.356802
XBP1	-0.310117	0.287533
RPS31	-0.310029	0.104343
CYM1	-0.309912	0.479623
ARP3	-0.309863	0.516755
EDC3	-0.309674	0.347289
SRP68	-0.309602	0.384659
LSM3	-0.308863	0.164977
GEP7	-0.308743	0.297943
YMR252C	-0.308464	0.3768
PET122	-0.307981	0.351593
YPL077C	-0.307697	0.166871
RFC2	-0.307494	0.312198
PSR2	-0.307408	0.276839
RMR1	-0.307025	0.448823
SWC7	-0.306641	0.133764
ZWF1	-0.30624	0.314771
PSH1	-0.305173	0.194669
SIS1	-0.304808	0.317131
YIL156W-B	-0.304653	0.114266
NTH1	-0.304541	0.55355
HUT1	-0.304056	0.405826
GIP4	-0.30395	0.448481
SKI8	-0.303637	0.417874
ESC1	-0.303353	0.415853
HIR2	-0.303269	0.54728
SHB17	-0.303241	0.151666
DCD1	-0.303101	0.265448
REX4	-0.302667	0.276226
SNF1	-0.302486	0.293858
MUK1	-0.301964	0.438495
DIA1	-0.301941	0.281185
SLT2	-0.301914	0.185089
TRS33	-0.301251	0.267491
ARP7	-0.301112	0.211661
YCS4	-0.300623	0.538936
PDR5	-0.300501	0.140483
RTT106	-0.300121	0.373442
RSC1	-0.299211	0.523408
CBF1	-0.298371	0.163694
NOP58	-0.298152	0.0978436
VRP1	-0.29753	0.276839
CDC8	-0.297056	0.284392
NTO1	-0.296616	0.360988
SHE10	-0.296611	0.296454
SAY1	-0.296048	0.239417
UFD2	-0.295833	0.435583
ISM1	-0.295815	0.308838
TPK2	-0.295203	0.303613
KTR1	-0.295188	0.25128
PPZ2	-0.295128	0.265596
SDT1	-0.294628	0.115906
CCT6	-0.294356	0.462355
SLC1	-0.294298	0.21441
SSS1	-0.294152	0.411987
ARD1	-0.29371	0.276687
NBP1	-0.293523	0.336452
PGC1	-0.293435	0.296729
CUE1	-0.293213	0.37254
CFT2	-0.292969	0.353066
RPB11	-0.292929	0.265596
IST1	-0.29292	0.192782
LSM8	-0.292847	0.145638
SEC27	-0.292814	0.448481
TGL1	-0.292778	0.353913
YMR178W	-0.292757	0.40545
PAN6	-0.292683	0.407921
AIM34	-0.292416	0.26713
PRP31	-0.2922	0.459867
DUN1	-0.291984	0.287533
EUG1	-0.291946	0.19859
GLE2	-0.291833	0.276839
SPC25	-0.291793	0.237855
YBR225W	-0.291665	0.461345
RNH203	-0.29138	0.191412
PIK1	-0.291069	0.464709
DIT2	-0.290643	0.195765
LSM1	-0.29023	0.305752
RHO3	-0.290175	0.245528
AOS1	-0.290067	0.272048
RTC5	-0.289906	0.263867
WHI3	-0.289492	0.265596
EST2	-0.289127	0.289218
HEL2	-0.288292	0.405826
DOM34	-0.287874	0.339779
TPT1	-0.28784	0.175446
KRE9	-0.287829	0.305752
OAC1	-0.287589	0.225531
MRPL17	-0.286115	0.299985
NCE101	-0.285983	0.108407
LCL3	-0.285676	0.364524
RCE1	-0.285431	0.164545
FAS1	-0.285259	0.448092
COX20	-0.285174	0.188307
PTP2	-0.284904	0.213964
HRD3	-0.284727	0.362667
YJR154W	-0.284707	0.250639
RPS26B	-0.284309	0.0794125
VPS4	-0.284308	0.276839
MMS4	-0.284099	0.441454
RBH1	-0.284029	0.211188
CCT7	-0.283395	0.458074
JLP2	-0.283355	0.263616
CAP2	-0.283324	0.36286
YKL023C-A	-0.283257	0.184775
IRS4	-0.283083	0.260289
YOR365C	-0.28277	0.207793
CHL4	-0.2827	0.213964
CUS1	-0.282674	0.280865
YJL055W	-0.282615	0.166395
GIS1	-0.282496	0.296454
CPR6	-0.282413	0.217288
PTC1	-0.282261	0.310695
LUC7	-0.282203	0.192782
MUP1	-0.282137	0.164545
FKH2	-0.282026	0.362339
OAR1	-0.281474	0.326958
AHC1	-0.281307	0.279369
SCS2	-0.280863	0.244423
CDC55	-0.280714	0.467032
UBC1	-0.280508	0.381242
SIL1	-0.280499	0.19859
OST6	-0.280343	0.361829
UBX5	-0.279561	0.214739
SCD6	-0.279133	0.301417
PIM1	-0.278618	0.338718
SEH1	-0.278314	0.237006
DSN1	-0.278257	0.185089
CTO1	-0.278256	0.265448
NCP1	-0.278147	0.407245
SNG1	-0.276808	0.228089
MKC7	-0.276747	0.282102
YUR1	-0.276058	0.337408
MNL1	-0.27589	0.357788
YGL258W-A	-0.275874	0.0843306
HSL7	-0.275838	0.447859
SFT2	-0.275783	0.314039
MPO1	-0.275719	0.268374
SLG1	-0.275484	0.236576
UBP13	-0.275189	0.25128
YKR023W	-0.274742	0.310695
CDC123	-0.274648	0.304349
TIF5	-0.274612	0.369498
PSD1	-0.274454	0.442478
PHO89	-0.274385	0.135891
YOR020W-A	-0.274306	0.251095
VMA5	-0.273356	0.29414
MPS1	-0.273126	0.281106
RVS167	-0.272829	0.261929
NSE3	-0.272518	0.274765
YLR225C	-0.272255	0.441758
ATF1	-0.272014	0.295297
MSB1	-0.271595	0.307435
SHR5	-0.271409	0.226989
SRB2	-0.271291	0.276839
SGM1	-0.271265	0.310695
YLR281C	-0.270399	0.265543
NOP8	-0.270021	0.27692
GRX3	-0.269695	0.447572
RRI1	-0.269558	0.240684
IOC2	-0.269458	0.271802
YGR017W	-0.269369	0.27692
NGL2	-0.269338	0.377381
CMP2	-0.269318	0.382386
SRL3	-0.269205	0.18864
TMA64	-0.269072	0.279172
SDD3	-0.268104	0.342436
HOT1	-0.267962	0.252873
CWC2	-0.267901	0.214519
IRC25	-0.267782	0.178804
KCS1	-0.267484	0.216692
TOM1	-0.267202	0.316205
KEL2	-0.267198	0.312198
YAK1	-0.266966	0.414572
AVT2	-0.266446	0.257772
IBD2	-0.266269	0.316205
WBP1	-0.266208	0.192782
FOL1	-0.265677	0.377606
SAP30	-0.26545	0.0978436
HCR1	-0.265103	0.314039
SEC18	-0.26501	0.337408
GNA1	-0.264855	0.175044
ABF2	-0.264838	0.188307
YML002W	-0.264713	0.387313
BNI1	-0.264698	0.392674
POP2	-0.264342	0.296454
SEN1	-0.26423	0.377543
ARC35	-0.263783	0.276797
SUP45	-0.263484	0.337408
SDO1	-0.262976	0.285963
MRX11	-0.262859	0.163339
FAA1	-0.262173	0.165763
PBR1	-0.262151	0.265543
MBA1	-0.261941	0.205351
STV1	-0.261759	0.328331
PBP4	-0.26165	0.235792
YGR053C	-0.26151	0.291108
BNA2	-0.261496	0.237685
RBS1	-0.261195	0.240684
RIO2	-0.26095	0.214519
MON1	-0.260762	0.244434
SRL2	-0.260482	0.211035
MNN11	-0.260365	0.38295
YTH1	-0.260348	0.233323
SLX4	-0.260024	0.218518
MLH2	-0.259635	0.324927
PRR1	-0.259268	0.265596
GAT3	-0.258045	0.0927164
PBY1	-0.257602	0.25128
YIF1	-0.256934	0.232224
ORM1	-0.256883	0.210541
MDN1	-0.256855	0.0873091
UBP8	-0.256679	0.19075
LDB19	-0.256627	0.404747
THI74	-0.256462	0.174669
YNL035C	-0.256454	0.289454
ATE1	-0.256169	0.271531
KRE5	-0.256138	0.342436
MAM33	-0.256111	0.173912
EMC10	-0.255895	0.210771
SYT1	-0.255591	0.336452
HEM4	-0.255393	0.215077
MAM3	-0.255036	0.251095
CMK2	-0.254938	0.23372
RCF3	-0.254908	0.188337
PRS2	-0.254695	0.149803
VPS70	-0.254431	0.223958
MIM2	-0.253586	0.1595
MSA2	-0.253542	0.372919
CHS6	-0.252737	0.18895
RAD53	-0.252572	0.268682
CDC60	-0.252501	0.142654
BUD17	-0.252328	0.216402
ECM7	-0.252281	0.374078
GTS1	-0.252269	0.228008
EDC2	-0.251888	0.159505
DUS1	-0.251862	0.274765
ARN2	-0.251861	0.110095
DAK2	-0.251684	0.119882
GRX6	-0.251677	0.183579
PSY3	-0.251247	0.150151
YBR016W	-0.251093	0.110095
SSA1	-0.251052	0.357774
MDJ2	-0.251041	0.142673
SLF1	-0.250491	0.239575
GTR2	-0.25009	0.192782
CBP2	-0.250012	0.301417
SEC13	-0.249632	0.281468
TRS85	-0.249631	0.37277
CDC16	-0.249396	0.298532
ECM21	-0.249064	0.300492
MTQ2	-0.248966	0.276797
NPL3	-0.248891	0.185296
PBS2	-0.248642	0.314771
PDR17	-0.247931	0.237855
YPL245W	-0.247813	0.156861
NUP1	-0.247607	0.357214
MTM1	-0.247581	0.329046
NSE5	-0.247429	0.364713
PAL1	-0.247315	0.283915
CYR1	-0.246458	0.369165
OCH1	-0.246338	0.246504
VPS74	-0.245822	0.381242
VMA7	-0.245732	0.363773
OPY2	-0.245725	0.216402
POL3	-0.245339	0.324927
YOR111W	-0.245143	0.22708
AVO2	-0.245058	0.192489
SWP1	-0.245038	0.327212
TOM22	-0.244837	0.300492
BAR1	-0.244602	0.200551
GAS5	-0.24454	0.287378
DUG3	-0.24384	0.234912
KRE33	-0.243732	0.117044
BUD8	-0.243293	0.29494
SET5	-0.242994	0.210302
PIH1	-0.242186	0.177851
EFR3	-0.242122	0.245946
YLR173W	-0.241766	0.300492
EXG2	-0.24147	0.196078
DFG5	-0.241263	0.299867
PEP8	-0.241173	0.216402
OST3	-0.240454	0.19925
XYL2	-0.239893	0.163078
DHR2	-0.238876	0.219647
PUB1	-0.23886	0.236576
YKL107W	-0.23882	0.110095
RRP40	-0.238629	0.253398
PSP2	-0.238626	0.360925
SPO12	-0.23819	0.13387
VHC1	-0.238013	0.300523
PET127	-0.237895	0.325944
BCY1	-0.237816	0.218629
MSB3	-0.237794	0.251447
BNA6	-0.237637	0.190615
YFR016C	-0.237341	0.188307
RBA50	-0.236899	0.185089
YIL152W	-0.236787	0.17163
GOT1	-0.236154	0.0979099
YPT10	-0.23608	0.151872
COQ6	-0.23572	0.246808
RNA15	-0.235702	0.177045
BNA1	-0.235591	0.173912
MAG1	-0.235056	0.241451
UBS1	-0.234989	0.174052
SPP382	-0.234686	0.236071
ALG13	-0.234625	0.175044
SBE22	-0.233761	0.312198
PEP7	-0.233149	0.276839
SNF12	-0.232397	0.188337
MDE1	-0.232305	0.191412
SUB1	-0.232254	0.141113
VPS35	-0.232106	0.360932
DPH5	-0.231679	0.188578
IMA5	-0.231051	0.167281
ADD37	-0.230978	0.270048
PTC4	-0.230119	0.216677
TFC1	-0.229936	0.286343
PSY2	-0.228721	0.300492
ITR1	-0.228352	0.177851
EHD3	-0.228155	0.185089
YPL247C	-0.227806	0.305574
RPS25A	-0.227548	0.117044
RRP1	-0.227349	0.260135
TPC1	-0.227165	0.196078
NAB3	-0.22707	0.236854
CHS3	-0.226853	0.204897
DRS2	-0.226844	0.310695
MRPL23	-0.226761	0.200309
CLB6	-0.226756	0.138925
RMD5	-0.226666	0.175656
CDC25	-0.226537	0.244673
NGR1	-0.2264	0.215789
MRS4	-0.226245	0.139112
SPO14	-0.22599	0.240684
GRR1	-0.225831	0.309845
WHI4	-0.225742	0.335797
SLD2	-0.225718	0.164268
MCM7	-0.225638	0.300492
AVO1	-0.225618	0.310695
CDC43	-0.225179	0.260467
DIT1	-0.224979	0.163551
IDS2	-0.224795	0.272449
YNL162W-A	-0.224633	0.0727468
PRP2	-0.224293	0.174873
INP53	-0.224062	0.339402
NQM1	-0.223768	0.108784
GUP1	-0.223591	0.141067
CAT5	-0.223033	0.130241
TRM10	-0.222777	0.185089
HOS2	-0.222388	0.25128
GDB1	-0.222065	0.283301
PST1	-0.221971	0.165763
FAR8	-0.221569	0.165763
PDA1	-0.221404	0.163339
YBR242W	-0.221357	0.283301
REF2	-0.220954	0.281468
MGM1	-0.220909	0.322373
EMC1	-0.220897	0.224719
SIN3	-0.220794	0.306378
KIN1	-0.220366	0.293947
ERS1	-0.220175	0.185296
URA3	-0.220087	0.112019
APP1	-0.219487	0.305752
CDC20	-0.219045	0.135911
FHL1	-0.218925	0.177851
SUI2	-0.218852	0.1675
PAP1	-0.218827	0.285123
PRX1	-0.218775	0.177414
LYS9	-0.218571	0.147732
AHK1	-0.218395	0.168823
SNF5	-0.218379	0.1315
DSC2	-0.218336	0.224001
MRS3	-0.218196	0.274765
LHP1	-0.21813	0.113114
HST3	-0.217902	0.173912
GCG1	-0.217845	0.161122
YBR284W	-0.21771	0.198656
PSF1	-0.217704	0.141067
MOT2	-0.217664	0.185089
ENV10	-0.217653	0.263254
YER156C	-0.217379	0.196073
TPP1	-0.217002	0.208029
ATG33	-0.216757	0.156872
MXR1	-0.215946	0.198487
IDP3	-0.215432	0.0794125
KSP1	-0.215427	0.25128
TCD1	-0.215271	0.235514
YPI1	-0.214991	0.146609
HKR1	-0.214855	0.218523
TED1	-0.214393	0.216556
APM3	-0.213944	0.130241
YEF1	-0.213921	0.142673
RAD6	-0.213584	0.174859
YML096W	-0.21329	0.207492
RVB2	-0.213248	0.237939
HNT1	-0.213238	0.175044
DCP2	-0.213225	0.283915
PTC3	-0.213109	0.191412
CDC24	-0.212452	0.29494
SOG2	-0.212207	0.232988
LDH1	-0.211983	0.192782
RPA135	-0.211945	0.0616322
NPL6	-0.211823	0.147163
PAM18	-0.211699	0.213786
YEL068C	-0.211506	0.0908831
ISA2	-0.21145	0.214519
VHR1	-0.211233	0.0969259
MTW1	-0.210633	0.0917442
CIN8	-0.21033	0.166395
ATG40	-0.210213	0.102821
AIM39	-0.210174	0.0999987
CEG1	-0.20972	0.2335
EST1	-0.208781	0.185121
MDM10	-0.208594	0.186348
SPC42	-0.208547	0.192489
SMC4	-0.207928	0.185089
PAM1	-0.207909	0.212103
HIR1	-0.207758	0.1675
SKG3	-0.20726	0.281019
PPH22	-0.207149	0.228583
LIH1	-0.207136	0.216677
PRP21	-0.206848	0.132324
MIM1	-0.206747	0.125803
PCI8	-0.206365	0.159248
YER134C	-0.206355	0.229533
RNQ1	-0.206337	0.173912
TIM23	-0.206313	0.219048
YGL185C	-0.20607	0.185089
ERP1	-0.205369	0.185089
CYC8	-0.204774	0.188337
ATG9	-0.204529	0.185089
CCR4	-0.204355	0.169613
RAV2	-0.204293	0.213927
NMA2	-0.203948	0.188158
RPL28	-0.203923	0.06988
CDD1	-0.203735	0.153133
NSG1	-0.203569	0.119934
TIM50	-0.203568	0.185089
MDH2	-0.203562	0.120129
SRP54	-0.203412	0.159406
PAN1	-0.203312	0.261929
TKL2	-0.203274	0.0696331
TCP1	-0.203161	0.172284
ARH1	-0.203025	0.224087
GDS1	-0.202902	0.117044
EKI1	-0.202886	0.13387
TRS20	-0.202811	0.178973
MUD2	-0.20279	0.170983
ADE2	-0.202668	0.225517
YVH1	-0.202448	0.164268
SYH1	-0.202393	0.298064
RSM19	-0.202313	0.13489
BDP1	-0.202305	0.16193
MNS1	-0.20223	0.191412
TOD6	-0.202024	0.107059
LAS17	-0.201416	0.166395
RAD1	-0.201262	0.276839
SEM1	-0.200606	0.0901272
DIN7	-0.200224	0.142673
RPL9A	-0.199904	0.0623404
SRB6	-0.199886	0.139626
SKI7	-0.19934	0.229254
MET3	-0.19932	0.210495
RPT6	-0.198936	0.130379
RVS161	-0.198834	0.130969
YPK2	-0.198713	0.148436
STP22	-0.198613	0.192782
OTU1	-0.198458	0.141067
CRR1	-0.198437	0.0908831
VMA11	-0.198147	0.192782
PRP6	-0.198097	0.251095
DCW1	-0.197861	0.251095
YBL036C	-0.197687	0.185089
COG3	-0.197335	0.227747
SFB3	-0.197036	0.190849
PRM1	-0.196682	0.17163
FUS2	-0.196285	0.116606
SSY1	-0.196222	0.19859
PEX7	-0.196175	0.149803
MCM4	-0.196039	0.214519
PMD1	-0.195855	0.251095
UBP3	-0.195704	0.14674
TBF1	-0.195626	0.242366
TRS130	-0.195352	0.211035
REB1	-0.19498	0.185598
CNE1	-0.194941	0.192782
POR1	-0.194787	0.114266
BET4	-0.194784	0.135891
STI1	-0.194717	0.155791
INO4	-0.194459	0.14709
QNS1	-0.194435	0.231957
ATG21	-0.194157	0.16193
NOP7	-0.193078	0.0586693
RSP5	-0.192714	0.250641
IRC5	-0.191823	0.185089
RBD2	-0.191797	0.138117
AIP1	-0.191732	0.17618
PET18	-0.191603	0.151565
OXR1	-0.191442	0.103696
RNH70	-0.191342	0.185089
PMT7	-0.191265	0.133517
CAM1	-0.191095	0.155791
MRPL16	-0.190823	0.185121
RTS1	-0.19061	0.259279
NFT1	-0.190431	0.193039
YNR062C	-0.190364	0.122589
KAP95	-0.190011	0.171761
RAD28	-0.189772	0.149523
KTR4	-0.189643	0.212626
FUM1	-0.189634	0.142673
LEU9	-0.189372	0.0651974
RPS27B	-0.189342	0.130505
PSF3	-0.188858	0.105902
MRPL19	-0.18884	0.130791
RPD3	-0.188827	0.173912
YMR253C	-0.188773	0.147732
PFS2	-0.18868	0.173912
SEC63	-0.188507	0.216692
YBL010C	-0.188449	0.139045
GLO2	-0.188381	0.139626
MTD1	-0.188336	0.114266
PEX5	-0.188177	0.155537
GCD2	-0.187378	0.191598
VPS75	-0.187327	0.239575
DAD2	-0.187135	0.157364
HPA2	-0.186972	0.151666
DSF2	-0.186871	0.130379
YGL140C	-0.186729	0.149499
CPD1	-0.186397	0.143081
SSE1	-0.186166	0.153185
YPK9	-0.186161	0.180839
ADE5,7	-0.1861	0.139626
YKR051W	-0.186038	0.171235
SPS2	-0.186007	0.069758
ARO8	-0.185955	0.0533902
SPS22	-0.185955	0.110095
CAN1	-0.185892	0.0737358
CDC34	-0.185253	0.185598
DAL2	-0.185127	0.0772206
CCE1	-0.184678	0.143081
CNL1	-0.18422	0.133764
YPL225W	-0.183917	0.137631
THI72	-0.183806	0.0979099
FUS1	-0.183486	0.16486
UGX2	-0.183113	0.0908831
VTI1	-0.181782	0.182373
NPR3	-0.181694	0.171989
NAS6	-0.181445	0.136548
SMI1	-0.181044	0.221813
RTA1	-0.180891	0.140506
BNA7	-0.180621	0.138781
SGD1	-0.180599	0.146876
EAR1	-0.179848	0.200642
ARG82	-0.179528	0.0936624
CCT8	-0.179072	0.133764
YDL057W	-0.179065	0.152801
RPN11	-0.179057	0.141067
MRP51	-0.178785	0.194757
PKP1	-0.178687	0.162559
PEX30	-0.177662	0.166395
LPL1	-0.177119	0.163551
YPR114W	-0.177068	0.174052
MMT1	-0.176645	0.185089
SEC65	-0.17639	0.173912
MRPL36	-0.175897	0.167323
RQC1	-0.175853	0.213964
HLJ1	-0.175625	0.19859
SKG1	-0.175413	0.210296
YGL159W	-0.174749	0.102316
RGL1	-0.174463	0.185089
ACF2	-0.174324	0.130379
POM152	-0.174313	0.203641
SGT2	-0.174274	0.161404
RPN4	-0.174093	0.111853
YPT53	-0.17397	0.161404
TOF1	-0.173376	0.187288
KTR7	-0.173338	0.185089
ALE1	-0.17318	0.149803
CMR3	-0.17277	0.129343
YOR289W	-0.172585	0.114266
RPL6B	-0.172515	0.0755236
AIM11	-0.171885	0.1386
VPS21	-0.17174	0.100311
RRN3	-0.171329	0.140468
FLC2	-0.171241	0.222796
PFA4	-0.171035	0.141684
CPR4	-0.170962	0.219048
DNF1	-0.170827	0.217139
SSN2	-0.170459	0.191412
BNI4	-0.170365	0.18125
SEC11	-0.170333	0.131795
MLC2	-0.170116	0.117505
OSM1	-0.16971	0.1675
PHR1	-0.169211	0.15063
SAN1	-0.1692	0.143707
UPS2	-0.169136	0.119795
NGG1	-0.168973	0.108407
GSH2	-0.168382	0.183885
TGL3	-0.168245	0.143081
LOA1	-0.168193	0.1675
ECM10	-0.168101	0.171093
RFC1	-0.168052	0.149803
PPH3	-0.167852	0.143081
TOM71	-0.167832	0.151116
YDR109C	-0.167749	0.157822
GCD6	-0.167523	0.134558
STT4	-0.166837	0.193956
SEC72	-0.166559	0.138117
NHX1	-0.166529	0.115906
ATG23	-0.166518	0.108432
ESC2	-0.166326	0.147163
PIB1	-0.166176	0.1186
PYC2	-0.166068	0.0575357
AIM10	-0.165489	0.115119
HNT2	-0.165352	0.106029
BEM3	-0.165325	0.19859
NEM1	-0.165324	0.188307
CTK1	-0.165213	0.173118
KAP104	-0.16493	0.173912
AAT1	-0.164042	0.1315
TCB3	-0.16402	0.226989
FTR1	-0.163995	0.0770059
MEX67	-0.16376	0.185089
MF(ALPHA)2	-0.163327	0.0839247
TYW1	-0.162905	0.130023
HOS3	-0.162715	0.156908
TDA7	-0.16216	0.165763
MYO4	-0.162061	0.192782
LSC1	-0.162031	0.0783766
SML1	-0.161873	0.0923296
YBR138C	-0.161081	0.133764
LTP1	-0.161005	0.139055
NUP42	-0.160705	0.164584
PSY4	-0.160644	0.123369
VMA4	-0.160288	0.134152
DFM1	-0.160215	0.133181
PDB1	-0.160185	0.122927
RGT2	-0.160085	0.178191
IES6	-0.159923	0.16486
YFL040W	-0.159919	0.1169
DSL1	-0.159859	0.129754
LCB5	-0.159183	0.147518
CPT1	-0.159132	0.11019
YIR042C	-0.159038	0.0361767
GDE1	-0.158763	0.104027
CNB1	-0.158565	0.0993212
END3	-0.158435	0.183579
ALR2	-0.158362	0.159177
PEX18	-0.15821	0.10307
YMR090W	-0.157804	0.138925
TFC4	-0.157773	0.16486
ARP1	-0.15764	0.125551
YLR352W	-0.15756	0.13977
CCT2	-0.157403	0.138925
COX10	-0.157143	0.123143
LAM6	-0.15699	0.133303
IMD3	-0.156938	0.0674634
NUP116	-0.15684	0.139112
TOM70	-0.156597	0.131728
UBA2	-0.156365	0.180212
GUK1	-0.156195	0.167957
SRM1	-0.156109	0.140377
FRS1	-0.156084	0.162273
RPC82	-0.155877	0.0901272
LAT1	-0.155656	0.0999987
APS3	-0.155386	0.067055
COQ8	-0.155095	0.126672
RIM15	-0.154567	0.175656
MPD2	-0.154322	0.108407
TAD2	-0.154215	0.110095
SAP190	-0.154124	0.192782
FIS1	-0.153861	0.0755236
MID2	-0.153836	0.133764
YLR283W	-0.153687	0.147163
YDR061W	-0.153431	0.13442
CLC1	-0.152747	0.147732
SGF29	-0.152731	0.0749903
IRC21	-0.152602	0.116793
BMH1	-0.152153	0.114191
SMP3	-0.152126	0.0908831
YJL132W	-0.151995	0.157822
PEX1	-0.151965	0.1438
AAP1	-0.151627	0.0581529
SGT1	-0.151613	0.0978436
GLG1	-0.151381	0.115119
LIP1	-0.150974	0.132357
MAP2	-0.150717	0.135891
PMT3	-0.150176	0.135891
GLC7	-0.150129	0.142673
TAX4	-0.149797	0.173912
BCH1	-0.149579	0.15717
IPI3	-0.149087	0.11019
NCS6	-0.148502	0.149616
ENP2	-0.148421	0.0894165
SVL3	-0.147338	0.131929
YKR045C	-0.146838	0.0857024
SFT1	-0.146499	0.117806
SUM1	-0.14632	0.157365
VBA5	-0.146035	0.0769601
LRS4	-0.145771	0.111853
SDS22	-0.14538	0.0890095
SSF1	-0.145351	0.0579684
WRS1	-0.145349	0.147732
MSS4	-0.144987	0.146789
UAF30	-0.1448	0.110514
NKP2	-0.144704	0.110095
ETR1	-0.144521	0.079615
TMT1	-0.144332	0.0873091
YHR045W	-0.144323	0.111853
FMO1	-0.144315	0.108489
NMD4	-0.144172	0.0770059
MRE11	-0.143779	0.103696
EFM3	-0.143018	0.0770193
MUP3	-0.142918	0.12992
ARP6	-0.142786	0.144708
SEC7	-0.142737	0.149499
BST1	-0.142526	0.105582
RAT1	-0.142399	0.0993212
PBI1	-0.142034	0.126628
MRH4	-0.142019	0.119795
ALG3	-0.141744	0.130791
MYO5	-0.141649	0.166067
VMA3	-0.141204	0.140468
DBP8	-0.141055	0.090742
SEC5	-0.140738	0.126508
SAG1	-0.140666	0.114266
RCH1	-0.140633	0.0769515
ULS1	-0.14008	0.141339
MNR2	-0.139648	0.154446
YDR124W	-0.139383	0.0647854
SLD5	-0.138792	0.0772206
KKQ8	-0.138658	0.129343
YKL018C-A	-0.138651	0.0584633
BRO1	-0.138562	0.125803
YPR147C	-0.138515	0.131237
HBS1	-0.138419	0.140506
SWC4	-0.138347	0.104027
ELP6	-0.138119	0.140377
YKL071W	-0.138023	0.110095
YMR085W	-0.138014	0.141067
NRD1	-0.137738	0.173912
SKI2	-0.137609	0.1315
ERV41	-0.137327	0.139626
FRS2	-0.137184	0.124137
NAB6	-0.137059	0.135387
MCA1	-0.136742	0.107006
RCK1	-0.136571	0.0605713
YJR124C	-0.136568	0.11019
UME1	-0.136375	0.122589
SGV1	-0.135973	0.149803
SIP3	-0.135582	0.136774
MSK1	-0.135233	0.110208
HSE1	-0.135067	0.125306
MUS81	-0.134987	0.139434
SEC17	-0.13494	0.0801389
VPS54	-0.134901	0.111033
PCL8	-0.134673	0.131795
DEP1	-0.134583	0.0800903
DER1	-0.134515	0.0895729
UBP14	-0.134152	0.143081
COX11	-0.134068	0.123046
MRX4	-0.133984	0.135891
LDB16	-0.13393	0.107051
SRN2	-0.133798	0.093311
LAP2	-0.133614	0.0916679
ISU1	-0.133478	0.110095
URN1	-0.133398	0.086296
YOS9	-0.13295	0.0999987
SIR2	-0.132906	0.138117
OMA1	-0.13271	0.106029
SSO1	-0.13215	0.130241
TOM5	-0.132033	0.0583575
INA17	-0.131981	0.0532028
TWF1	-0.131916	0.109072
OPT1	-0.131753	0.0473547
MIX17	-0.13173	0.142673
MVP1	-0.131691	0.1315
UGP1	-0.131424	0.0811323
KNS1	-0.131161	0.141067
DED1	-0.131159	0.0647854
MIC10	-0.130954	0.119795
MRPL6	-0.130828	0.102558
WSS1	-0.130533	0.103444
TDA9	-0.129951	0.139626
CNN1	-0.129915	0.117044
GIM3	-0.129862	0.0932801
PUS5	-0.129778	0.0739013
PTA1	-0.12904	0.130379
NPT1	-0.128455	0.117044
SCH9	-0.128445	0.15352
YGR050C	-0.128377	0.0477083
YCR099C	-0.128372	0.0755236
ATG4	-0.128292	0.107006
FIN1	-0.127955	0.0932041
CTS2	-0.127871	0.0775794
SNF6	-0.127717	0.134201
MMS2	-0.127536	0.128985
RIC1	-0.127461	0.108636
YEH1	-0.127213	0.0688977
RAD50	-0.127175	0.112203
SBH1	-0.126945	0.0978436
YHL044W	-0.126694	0.0855943
TRM13	-0.126562	0.0996362
[truncated: 3,389 more rows]
