# Supplementary material for: Control of meiotic entry by dual inhibition of a key mitotic transcription factor
Source: eLife. 2024 Feb 27;12:RP90425. doi: 10.7554/eLife.90425 (PMC10939502; doi:10.7554/eLife.90425)
Supplement: Supplementary file 3. — First tab is WHI5-AA; ∆LUTI vs. wild type. Second tab is WHI5-AA vs. wild type. Third tab is ∆LUTI versus wild type. [file elife-90425-supp3.xlsx]

## Sheet: wildtype vs. ∆LUTI;WHI5-AA
GeneName	log2FoldChange	neglog10(padj)	EMG	SBF
ZIP2	-0.449998	0.64487	yes
ZIP1	-0.986859	3.43589	yes
YSR3	-0.305612	0.449335	yes
YIR016W	-0.19763	0.198004	yes
YGL081W	-0.896522	3.1993	yes
YDR018C	-0.412893	0.925197	yes
YCR061W	-0.26085	0.44907	yes
VNX1	-0.66849	2.2751	yes
SPT21	-0.151545	0.18467	yes
SPO16	-0.800754	3.05656	yes
SPO13	-1.00315	4.62673	yes
SPO11	-0.934494	1.94509	yes
SPO1	-0.672419	1.69418	yes
SMC6	-0.00209449	0.00151809	yes
SEN34	-0.257211	0.223886	yes
SCC2	-0.736427	2.81833	yes
SAE3	-0.512552	1.22291	yes
RNR1	-0.442479	1.25722	yes
RNP1	-0.943728	5.21822	yes
RNH201	-0.0141168	0.00995683	yes
RMA1	-0.0661655	0.0392798	yes
RED1	-0.860702	2.90257	yes
REC8	-0.849509	4.04045	yes
REC114	-0.912802	4.32704	yes
REC102	-0.715392	1.87856	yes
PRI2	-0.376857	0.497276	yes
PRD1	-0.611687	1.87338	yes
POL2	-0.327306	0.779718	yes
POL1	-0.318443	0.684077	yes
PMS1	0.142714	0.185681	yes
PDS5	-0.483815	0.952696	yes
PCH2	-1.01914	7.32491	yes
NUS1	-0.827028	1.95072	yes
NSE4	-0.0118503	0.00995683	yes
NDJ1	-1.19194	4.82017	yes
MSH5	-0.796804	3.01403	yes
MSH4	-0.905681	3.31569	yes
MRC1	-0.0739612	0.0626238	yes
MND1	-0.493464	1.01706	yes
MER1	-0.90825	4.76451	yes
MEK1	-0.895493	2.34119	yes
MEI5	-1.24029	5.46603	yes
MEI4	-0.972091	3.87208	yes
ILM1	-0.141554	0.144465	yes
ICL2	-0.564238	1.18383	yes
HOP1	-0.72343	2.49199	yes
HMG2	-0.764868	2.56254	yes
HED1	-0.949706	2.98985	yes
HCM1	-0.43239	1.14866	yes
FKS3	-1.0224	4.01744	yes
ESC8	-0.125998	0.123948	yes
ECO1	-0.0842078	0.0574154	yes
ECM11	-1.18315	3.17917	yes
DPB2	0.0613957	0.0392798	yes
DOC1	-1.05781	3.07802	yes
DMC1	-0.908424	2.81833	yes
CWH41	0.133593	0.161639	yes
CTF4	0.0100797	0.00995683	yes
CST9	-0.442771	1.01184	yes
CSM4	-1.04714	2.6331	yes
CDC45	-0.232692	0.210776	yes
CDC21	-0.1952	0.200919	yes
BUB3	-0.200749	0.272785	yes
ASF1	-0.295059	0.367027	yes
SWE1	-0.0765683	0.0778223	yes	yes
TOS4	-0.165323	0.231876	yes	yes
AGE1	0.597699	1.29273		yes
AGP1	1.18169	3.21667		yes
ALG14	0.223832	0.165347		yes
AMF1	0.351441	0.452143		yes
AQR1	0.45071	0.376214		yes
BBP1	0.169954	0.144698		yes
BUD9	0.200512	0.165019		yes
CAP1	-0.126968	0.13648		yes
CBF2	-0.0956639	0.0969109		yes
CCW12	1.15773	3.06562		yes
CIS3	0.910608	0.268236		yes
CLA4	-0.383889	1.05712		yes
CLB2	0.32113	0.291157		yes
CLN1	1.32601	3.31569		yes
CLN2	0.221367	0.215621		yes
CLN3	0.0999094	0.0770942		yes
CRH1	0.798586	1.56778		yes
CSI2	0.816865	1.48819		yes
CWP1	0.630646	0.801688		yes
CWP2	0.124418	0.0922345		yes
ECM33	0.620708	1.40342		yes
ENV9	0.234179	0.337411		yes
ERG11	0.464321	0.488055		yes
ERG4	0.264116	0.400241		yes
EXO5	0.336325	0.56798		yes
FKS1	0.417756	0.589038		yes
GAS1	0.761805	1.28915		yes
GAT2	-0.294429	0.493085		yes
GFA1	-0.366516	0.701594		yes
GIC1	0.0510261	0.0302769		yes
GIC2	0.1001	0.102852		yes
GTB1	-0.0198021	0.017262		yes
HHO1	-0.444814	0.869358		yes
HO	0.0729363	0.0382212		yes
HOG1	-0.2041	0.258819		yes
HSL1	0.467012	1.58189		yes
HTZ1	-0.521885	0.894467		yes
HXT3	0.2661	0.356609		yes
IPT1	-0.0205146	0.0152082		yes
KCH1	0.0791782	0.0734676		yes
KRE6	0.233508	0.3008		yes
LAC1	-0.0264503	0.0183192		yes
LTE1	-0.130311	0.130197		yes
LYS20	1.34109	5.21822		yes
MIT1	-0.308412	0.715942		yes
MNN5	0.0440921	0.0392798		yes
MSB2	0.0919674	0.0879378		yes
NAN1	0.274392	0.429915		yes
NDD1	-0.506623	1.1629		yes
NUD1	0.125374	0.10769		yes
PCL1	1.86558	3.6758		yes
PCL2	0.336373	0.57698		yes
PDR1	-0.457084	1.29743		yes
PDR16	0.753008	2.82636		yes
PET54	-0.110861	0.101939		yes
PET9	-0.133742	0.10826		yes
PIL1	-0.211514	0.267426		yes
PLB3	-0.377852	0.822413		yes
PLM2	-0.171432	0.204066		yes
PMC1	-0.0113533	0.0112651		yes
POG1	0.0144467	0.0132369		yes
PPN1	-0.142594	0.182726		yes
PRY1	-0.0683677	0.0397266		yes
PTH4	-0.134843	0.0443676		yes
RAX2	0.68453	1.33362		yes
RPL18B	0.214639	0.165347		yes
RPL37A	0.599577	0.673466		yes
RSR1	-0.0277293	0.0203821		yes
SCW4	-0.237555	0.443039		yes
SED1	-0.120458	0.0985899		yes
SFG1	0.38457	0.396755		yes
SIM1	0.626725	1.06782		yes
SKM1	0.301134	0.553696		yes
SLM4	-0.0484886	0.0388671		yes
SNF11	-0.053401	0.0347068		yes
SOK2	-0.0188714	0.0164892		yes
SPB1	0.444604	0.800323		yes
SPO20	-0.450831	0.795538		yes
SRL1	0.416111	0.305701		yes
SUR1	-0.0655959	0.0390676		yes
SVS1	0.458806	0.868194		yes
TOK1	0.471979	1.18236		yes
TOS2	0.390048	0.625666		yes
TOS3	-0.037916	0.0236666		yes
TOS6	0.693795	0.819714		yes
TOS8	0.829125	2.9973		yes
TYE7	0.325492	0.244076		yes
UTH1	-0.910237	2.44676		yes
UTR2	0.798235	1.87338		yes
YAT1	0.503466	1.56778		yes
YBL029W	-0.0979689	0.0787328		yes
YBR071W	0.275039	0.597286		yes
YDL183C	0.0225877	0.017262		yes
YGR153W	-0.204233	0.144381		yes
YHP1	1.07321	2.25138		yes
YKR011C	-0.524009	1.69419		yes
YOL019W	0.868896	1.75515		yes
YOR342C	0.577122	0.998187		yes
YOX1	0.184315	0.232166		yes
YPS3	0.304531	0.449335		yes
YSY6	-0.190301	0.205085		yes
ZEO1	-0.0993093	0.0810445		yes
YCL068C	10.1664	7.69647
TRP1	3.33736	41.6027
HIS4	1.90917	1.22362
CYC1	1.69898	5.49363
ADH5	1.57721	5.15991
YGL117W	1.57332	6.98848
ATG41	1.55858	10.3363
HOM3	1.54427	3.83254
MET17	1.51693	5.38416
ASN1	1.44823	2.6017
DLD3	1.44024	6.61564
SUL2	1.42478	2.59357
DIP5	1.40621	3.90507
SAM3	1.36222	5.11399
YRO2	1.33849	2.52783
MET5	1.31564	4.89372
GNP1	1.3073	3.23755
STR3	1.28821	5.03348
YPL264C	1.28782	2.92181
LEU4	1.28675	3.2647
PRY2	1.28304	2.2133
CPA2	1.27277	2.50455
VHT1	1.26313	3.01592
YIR042C	1.22983	2.2311
ARG3	1.22945	4.63339
BOP2	1.22649	4.57399
LYS1	1.2182	2.81833
ACO2	1.17634	2.81833
ARG5,6	1.16385	2.76531
ARG8	1.15886	4.36524
GLN1	1.14745	3.4392
GRE2	1.14481	3.2647
NIT1	1.14323	2.81833
SUL1	1.13947	3.4392
BIO5	1.13688	4.64141
ARG4	1.1368	3.69507
YMC2	1.13197	4.6912
SDH2	1.1216	6.22891
MET14	1.12093	3.01403
SEO1	1.10854	4.26146
THI73	1.09676	2.08503
NSR1	1.08883	3.80563
ARG1	1.08878	4.07756
ARO1	1.08388	1.96568
TPI1	1.08177	2.50745
DSE4	1.07878	1.94851
URA10	1.07829	2.87684
SAM2	1.07707	6.99565
MAN2	1.07114	1.90754
RPS9A	1.06192	0.679213
BIO2	1.059	3.04481
TDH3	1.05752	1.87338
ADE17	1.04979	1.58716
SSU1	1.04917	2.45547
IDP1	1.04766	3.01592
ICS2	1.04138	1.56778
FLC1	1.03879	2.81496
ODC2	1.02933	2.50135
ATO2	1.02746	4.63339
ARO3	1.02612	2.74023
ADE12	1.02193	2.87684
ATR1	1.02139	5.04891
ARO4	1.01791	1.84732
FCY2	1.01683	3.05216
CUP1-2	1.01093	1.55262
MET6	1.00852	3.31569
YAT2	1.00767	5.21822
ILS1	1.00035	2.21644
FBA1	0.991179	1.99766
TAT1	0.990774	4.04045
ARG7	0.989104	1.6972
BSC5	0.988518	1.56416
RGI1	0.983938	1.69419
ORT1	0.97851	2.7734
CYB2	0.973735	4.04045
MNN1	0.973126	2.30168
AIR1	0.95869	1.30954
GPP1	0.943856	2.86651
TRP4	0.942713	2.87925
TAT2	0.938142	3.86831
SHM2	0.934043	2.39249
PGI1	0.932252	1.43619
ZRT1	0.929374	2.81833
ALD6	0.929246	1.66953
EXG1	0.928898	1.51956
MRI1	0.919522	3.01838
PKP2	0.918948	2.54674
YAH1	0.918212	3.4392
COX6	0.908096	3.95411
CHA1	0.906076	1.48929
COA2	0.905184	2.65897
PGK1	0.902723	1.48929
SKP2	0.899948	1.82207
PDC1	0.891898	1.2654
EGT2	0.890906	0.265277
ERG28	0.890217	2.49631
TKL1	0.886597	1.40809
COX26	0.885106	1.47467
TRP3	0.88308	2.81306
YIL166C	0.882722	1.68008
MIG1	0.873703	3.51301
DSF1	0.872308	1.69839
MET10	0.870529	1.92454
HOM2	0.868634	1.70983
ILV3	0.858114	1.52912
FRE7	0.854905	1.31274
SDH1	0.851688	3.15939
YNR040W	0.851458	1.01706
PCL5	0.848985	1.84336
YJL133C-A	0.845625	1.44407
CAF16	0.839868	2.2542
COX8	0.839137	2.86651
DSE2	0.838546	0.907182
ENO1	0.838486	1.18383
RIP1	0.838005	3.1937
SCW10	0.836906	1.67553
MUP1	0.833093	1.92778
YLR125W	0.831417	0.85753
CTR1	0.830728	2.00976
URA2	0.826765	0.949573
YLR053C	0.825547	1.58716
GGC1	0.822527	2.27642
ERG1	0.821492	1.28915
PIR1	0.820966	0.998187
GPM1	0.820856	1.24937
PMA1	0.81573	0.91233
AHP1	0.814138	2.06001
ICY1	0.812634	2.89152
CIR2	0.811229	3.47325
GLY1	0.810394	2.76191
QCR9	0.809964	2.63939
ENO2	0.807276	0.91233
LYS4	0.807029	1.63758
SNZ1	0.80579	1.58295
CAB2	0.80516	3.90507
RTK1	0.805015	3.31569
SWI5	0.804441	0.848847
FMP48	0.803001	3.53913
KNH1	0.802861	2.50135
YDR381C-A	0.80114	2.18265
PDR8	0.797662	1.92454
GCY1	0.797356	3.05216
TOS1	0.796866	1.32366
TPA1	0.795915	1.48245
OPI3	0.795506	1.07764
RPL22B	0.794927	1.33023
#N/A	0.793899	1.26803
TEN1	0.792517	0.760282
QCR8	0.791266	1.56778
HIS7	0.783316	2.39249
HIS1	0.781977	1.93592
ADE3	0.773649	2.29673
PPS1	0.773289	2.59357
ILV2	0.765475	1.50162
YPR010C-A	0.762507	1.72423
CTT1	0.76224	1.49574
GLT1	0.761179	0.268236
ATO3	0.760866	2.9973
TDH1	0.75826	1.80836
BDH1	0.756253	2.74125
UGA3	0.75544	1.28554
ARO2	0.753957	1.5107
TRP2	0.75363	1.41796
CCP1	0.753587	1.90836
YJR115W	0.752709	1.15289
TDH2	0.751901	0.968373
YNL217W	0.744143	1.44695
SCS7	0.743849	2.13892
MRPL33	0.742785	1.1614
MET2	0.742067	2.80829
SOD1	0.738631	1.94509
GPX1	0.73857	1.87338
BOL3	0.737866	1.03529
ICP55	0.73703	1.91801
NRK1	0.736768	1.04657
GLG1	0.736273	2.09461
HMG1	0.734987	1.56778
IPK1	0.733369	1.5107
YML131W	0.730415	1.54956
ARO8	0.730295	1.01706
HXK2	0.730011	0.535917
TEC1	0.729504	1.54645
YHB1	0.728769	1.43554
HIS3	0.728074	1.22541
TRP5	0.72666	1.40987
PRP11	0.725859	2.01978
CYC7	0.725142	1.75428
RPL9A	0.724502	0.615183
ERI1	0.716605	0.553696
SER1	0.716242	2.21644
CHO2	0.715656	2.44321
QCR10	0.715444	3.14727
HIS5	0.712353	1.55825
DSE1	0.711767	0.92514
SAM1	0.708976	1.66049
NAR1	0.708863	2.10196
CDC20	0.706788	1.48038
EMP47	0.704602	1.53386
CLB1	0.704043	0.657892
RPS18A	0.700777	0.951103
BAP3	0.699396	1.17706
GAL7	0.69844	0.376315
RPL13A	0.698086	0.835811
FMP23	0.696883	2.18079
GRX4	0.695077	1.33663
IPI1	0.694302	0.997599
LYS12	0.694194	2.57073
MPC2	0.69331	2.84069
MET16	0.692726	1.49815
RPS12	0.69155	0.805258
FAA3	0.690072	1.33194
PDR5	0.689741	1.44407
YJL213W	0.688679	1.33362
PSA1	0.687482	1.01706
STD1	0.687191	0.998187
TIM9	0.686303	0.553696
RPS27A	0.685081	0.919911
BIO3	0.683482	1.44407
COX4	0.683478	2.23349
CTF13	0.68299	0.673466
AIF1	0.682961	0.808196
YHR210C	0.682204	0.596345
YEL068C	0.680224	0.716885
COX5A	0.677704	3.00154
PAU17	0.677359	0.613767
MCR1	0.676663	2.87925
RPS16B	0.672769	0.816347
ERG5	0.670972	1.27428
QDR3	0.670391	1.66093
RPL20A	0.670066	1.13732
FUN26	0.667462	1.94763
HSP78	0.663738	2.93804
YDL129W	0.662855	1.18706
CDC19	0.661943	0.954058
ATM1	0.661875	1.2295
CYB5	0.66012	0.833236
PHO84	0.659565	1.24507
CNA1	0.658723	1.60773
ERG9	0.657671	1.50162
FSH1	0.656537	0.968082
ARE1	0.653701	2.2751
YLR152C	0.653477	1.46811
QCR2	0.651702	3.14727
MHO1	0.651702	1.71646
RPL21B	0.651052	0.770407
AIR2	0.650867	1.69832
SOL1	0.649482	1.52871
TMA23	0.649225	1.47416
HTD2	0.647279	1.58716
GPG1	0.647239	1.78929
PPM2	0.646393	0.7445
VBA1	0.64597	0.669798
TMA10	0.643232	2.23691
ACH1	0.642805	2.85362
COX12	0.640677	2.09012
DBP3	0.638682	0.975202
RPA43	0.638524	0.705198
AEP3	0.63805	1.34
FMP45	0.637659	1.35096
MTQ1	0.637075	1.09113
MET1	0.637063	1.22377
PMU1	0.635728	1.10317
MTO1	0.634746	1.50383
OSW7	0.634284	1.13472
ECM15	0.633084	1.25519
MET22	0.631948	1.69839
SUN4	0.631705	0.695626
YJL045W	0.631658	2.61789
SWF1	0.629983	0.925722
MRH1	0.629301	0.890788
NDI1	0.62908	1.94707
ADE4	0.628504	1.63607
YGR035C	0.628434	0.66714
YIL002W-A	0.627538	0.724043
YDL121C	0.62737	1.17913
DRS1	0.626511	1.03898
STR2	0.625792	1.52361
TAE1	0.623859	0.848847
IQG1	0.621529	0.900142
GFD2	0.620624	0.430719
YKL065W-A	0.620142	0.458924
YHR020W	0.619637	0.744128
RRF1	0.617603	0.947486
YMR31	0.617603	2.3947
NUP100	0.616342	1.82207
HSH49	0.613868	1.49873
ALD5	0.612616	0.925883
AMN1	0.611413	0.626305
DDR48	0.611164	1.55002
RLP24	0.610926	1.10403
MSC7	0.610813	1.07986
CRF1	0.610338	1.25204
YPC1	0.60731	1.31568
AGX1	0.606841	1.59066
TRX3	0.606492	1.77235
VBA2	0.603578	1.2176
RPL27B	0.603372	0.481292
YKR075C	0.603104	1.2539
ILV1	0.602507	1.05749
DML1	0.602308	1.27797
STE6	0.600011	1.42372
EMG1	0.599545	0.714889
GUT2	0.598396	1.68977
RPS1A	0.598228	0.698442
SDH3	0.597762	2.74125
SUC2	0.597103	2.60438
YCF1	0.59692	1.39956
DFG10	0.595041	0.403953
LYS21	0.592635	1.44309
YGR283C	0.592335	0.679213
MTH1	0.592288	1.88244
ASN2	0.591711	1.50491
SHR3	0.590682	1.15013
HEH2	0.590505	1.515
HEL1	0.589542	1.42606
GPD2	0.589513	2.06726
YBT1	0.586517	1.20508
LYS2	0.586448	1.18393
SCP1	0.586413	0.925883
CHS2	0.58335	0.38492
TDA6	0.58331	0.832199
MAK5	0.58176	1.33023
RPL1B	0.581576	0.560172
TOM6	0.580738	0.328708
MRM1	0.579428	1.50338
AXL2	0.579319	1.11298
THI22	0.578877	1.10288
YKL033W-A	0.578587	0.835811
HMS1	0.578017	1.43866
RCM1	0.576912	1.43356
THG1	0.576752	1.10528
UTP5	0.576484	1.07764
CTS1	0.57552	0.771046
BNA3	0.574159	1.55518
ARG2	0.573206	1.54645
VPH2	0.571972	0.432669
NDE2	0.571708	1.25817
RPL3	0.569966	0.663508
EMC6	0.569813	0.848847
ERV1	0.569266	0.807188
RPS2	0.568992	0.63858
COX13	0.568076	2.3228
MIC12	0.566566	1.00127
TEA1	0.566111	1.22142
SPG1	0.56589	0.90398
CGR1	0.564228	0.660053
MAS2	0.563457	1.54956
HMO1	0.56313	1.47757
KGD1	0.5627	1.63544
BUD7	0.562155	1.12327
FUI1	0.56208	0.81139
FMP10	0.561266	1.36959
VID24	0.560591	1.14039
PDH1	0.56033	2.38789
AAR2	0.560032	1.10753
ERG20	0.559706	1.25519
ACS2	0.559704	0.865134
FRE2	0.558867	0.556192
YFH7	0.557914	0.588904
FET3	0.55703	1.03641
RPF2	0.556649	1.01136
UTP10	0.555927	0.779718
STF2	0.555629	0.963806
ERG3	0.555358	0.836234
GPX2	0.55466	0.574408
YNL190W	0.554353	1.48038
THI21	0.554042	1.35183
SCM4	0.553881	1.46901
SSA3	0.552787	0.69614
SUT2	0.552601	1.18154
THI20	0.552513	1.46687
RPL30	0.552336	0.607489
FOL2	0.551542	0.868695
TOH1	0.550127	0.905544
NYV1	0.548267	1.25519
DED81	0.548054	0.736449
MET3	0.547186	0.763058
HXT5	0.54635	1.95408
AFG1	0.546297	1.39295
RIB5	0.546231	1.156
PCL10	0.546097	1.33023
ADH1	0.545577	0.589043
BPT1	0.544893	1.18393
SRL4	0.544571	0.670465
PXP2	0.543857	1.35096
DDR2	0.543791	0.50162
PDX3	0.54228	1.28216
FLO5	0.54043	1.01269
WTM1	0.540411	1.38193
SNL1	0.540012	0.679213
SER33	0.538222	1.43834
FMP16	0.537671	0.692797
KRE29	0.537448	0.706486
CTR9	0.536992	1.05712
RPS3	0.536765	0.565605
OLA1	0.536147	0.869654
TSL1	0.53582	1.34409
SNO1	0.535466	1.03898
AIM6	0.535429	1.20508
PPM1	0.534725	1.45849
IFM1	0.534635	1.05749
KIN82	0.534119	1.00492
YER156C	0.532919	0.998187
ITR1	0.531325	1.43381
YLR363W-A	0.530889	0.262283
YKL133C	0.530725	1.56778
ZRT2	0.530466	1.88079
KTR6	0.530383	1.63576
CBF5	0.530263	0.828818
YLL058W	0.529216	1.42606
UPS1	0.528842	1.33362
RNR2	0.52821	1.1012
NOG2	0.528037	0.700767
EFM2	0.527221	0.61963
VCX1	0.52658	1.18644
MRPL11	0.524715	0.822413
PUT4	0.524047	0.70201
IRC7	0.523938	1.06979
CCC1	0.523836	0.77675
SEG1	0.523816	1.36032
COQ2	0.522674	0.998187
MID1	0.521741	1.23046
VHR1	0.521217	1.40248
YHR213W	0.521011	0.358672
CHS7	0.521008	1.23709
RPL1A	0.519313	0.553696
CMC4	0.518036	0.47074
RKR1	0.516602	0.816424
DIB1	0.516357	1.1328
PWP1	0.516071	0.908057
RPP1A	0.51596	0.57764
YHR180W	0.515948	0.553465
RNR4	0.515836	1.55262
YAR028W	0.515248	0.492284
KEL1	0.514409	1.11298
YHR078W	0.514185	1.00697
RPL9B	0.514055	0.438566
PIP2	0.514043	0.955675
DIA3	0.513886	1.45038
YIL059C	0.513516	0.194047
ADE13	0.512167	0.836234
YJR061W	0.512097	1.18858
YJL206C	0.511954	1.04528
YHM2	0.511917	0.665479
#N/A	0.511175	0.5359
GPC1	0.508402	1.48007
DCS2	0.50795	1.18606
RPL21A	0.507639	0.339899
THR1	0.505162	1.10493
RGS2	0.505084	0.955675
OPT1	0.504828	0.791232
VAS1	0.504789	0.853041
YJR154W	0.50434	0.603907
FET4	0.503842	0.919911
HOR7	0.503613	0.956348
YEN1	0.503381	1.1012
YFL041W-A	0.50286	0.243691
YPQ1	0.502278	1.11217
ARI1	0.502009	0.602202
MCP1	0.501912	1.02531
MET30	0.501348	1.06979
FOL3	0.501085	0.5639
DLT1	0.499481	0.803775
FRM2	0.499227	0.490267
PYC2	0.4979	0.819714
YNL134C	0.496295	1.48929
TAL1	0.49584	1.04528
YLR456W	0.495769	0.625828
RAD7	0.495502	1.18229
GOR1	0.494079	1.27428
RGI2	0.494077	1.23579
GLO1	0.494074	1.15309
UBX6	0.493973	1.23735
YOL014W	0.493251	0.332105
RMD6	0.493204	0.714889
NUC1	0.492644	0.755332
KRS1	0.49224	0.822413
CRD1	0.491496	1.13472
RPL22A	0.491156	0.340099
TOA2	0.490552	0.699466
EGO4	0.489978	1.25519
VMR1	0.489906	0.73427
PFA3	0.489457	0.913642
HEM25	0.488876	0.770407
HXT13	0.48669	0.791232
COS12	0.485196	0.385089
SAP4	0.485158	0.903795
PLB1	0.484556	1.18476
#N/A	0.483951	0.66714
RAS2	0.483724	1.16094
YPS6	0.482999	1.15369
RHO5	0.48279	0.968495
SSB1	0.481844	0.537619
TPO2	0.481385	0.968082
YDR249C	0.480945	0.38492
ECM31	0.480779	0.708537
SEN2	0.478058	1.11579
YHK8	0.477956	0.666749
MRS1	0.47706	0.553696
BSC6	0.476922	0.803775
PMA2	0.476821	0.77801
DPH2	0.476253	0.92012
ERG7	0.475523	1.27306
ATX2	0.475113	0.758974
ACO1	0.473627	0.90398
PRR2	0.473412	0.822413
NVJ1	0.472467	1.25519
QCR6	0.471945	1.2833
IMP4	0.471543	0.568494
RPS7A	0.471538	0.313242
YPR170W-B	0.471309	0.784721
YCL012C	0.470781	1.04122
BRX1	0.470263	0.63858
YCL049C	0.467875	1.09784
LIP5	0.467661	1.44407
YEL1	0.466988	0.945562
GDH2	0.466907	1.59047
TAD1	0.464904	0.712587
ATP17	0.463946	1.03226
CPR3	0.462376	0.667795
DLD2	0.462203	0.774166
ENA1	0.461496	0.848333
GAD1	0.46043	1.2532
GUT1	0.459742	1.24692
TIM11	0.459658	0.866303
IPA1	0.45933	0.662353
YCT1	0.45897	0.466357
NTG1	0.457757	0.679865
MYO1	0.456464	0.612335
YGP1	0.456058	1.00492
CHO1	0.455837	1.33708
YJL127C-B	0.455599	0.552824
OYE2	0.455593	1.07321
ICL1	0.455322	1.27797
GOT1	0.454427	0.557468
ISC10	0.453733	0.997611
MSN1	0.45365	0.91233
YMR1	0.453589	1.03193
MDM36	0.453517	1.2363
RAD5	0.452287	1.1268
MDM38	0.451107	0.831715
UTP21	0.450537	0.955675
MUP3	0.449623	0.706787
SAP155	0.449438	0.931377
ASH1	0.449432	0.597286
YGR079W	0.449083	0.48546
PIC2	0.448273	0.944181
SDD1	0.448243	0.272328
SPO24	0.448016	1.21721
EFT2	0.447916	0.588399
YMR295C	0.447869	1.3407
PUS1	0.446507	0.729173
CPS1	0.446507	0.517306
ERT1	0.446422	0.836234
CIA2	0.446293	0.589038
NOP56	0.445478	0.508885
RPL10	0.444758	0.335758
AAP1	0.443218	0.655474
MIX14	0.443086	0.413603
DRN1	0.443055	0.919911
PCL9	0.442725	0.323471
THR4	0.442559	0.553712
ATG10	0.442503	0.299831
JJJ2	0.442417	0.679213
GTO1	0.441756	0.7395
SPT8	0.441194	0.91233
YGL194C-A	0.441059	0.410376
STE13	0.440575	0.87708
CMC1	0.440487	0.508518
EFM4	0.440401	0.499795
PWP2	0.440298	0.724816
YGL101W	0.438658	0.832199
OMS1	0.438594	0.935379
CYT1	0.436714	1.40823
POP1	0.436081	1.03353
PHM8	0.435983	1.34112
UGA1	0.434755	0.997611
SAD1	0.434507	0.318065
RTC3	0.433985	0.47074
DCK1	0.433875	0.992445
YEH2	0.432786	0.989821
RRP5	0.432721	0.608576
ADE6	0.432195	0.777299
UTP18	0.431791	0.584701
CTA1	0.43176	1.44407
ARV1	0.431388	0.388217
CSR2	0.431009	0.919911
#N/A	0.430338	0.318157
NTG2	0.429878	0.891186
APM1	0.427951	0.718589
WTM2	0.427854	0.903795
RKM2	0.42737	0.77801
RPS24A	0.426535	0.284798
YPR003C	0.426513	0.771046
TIM8	0.426163	0.240198
RPL16A	0.425357	0.367833
MSY1	0.423821	0.705198
HOM6	0.423601	0.935379
POA1	0.42314	0.568033
IDI1	0.423132	1.02772
SDP1	0.423115	0.706787
MEP3	0.423011	0.288904
UTP8	0.422963	0.7395
GDH3	0.422932	0.386954
SEN15	0.422875	0.360708
EFT1	0.422545	0.555878
OPI1	0.42236	0.817654
PUF6	0.422222	0.678547
SLU7	0.422093	0.836428
EFG1	0.420798	0.496341
XPT1	0.420409	0.906612
SRY1	0.420358	0.644507
YDL085C-A	0.420169	0.434831
YJR039W	0.420078	0.947486
RRP6	0.419891	0.756678
KTI12	0.419229	0.655474
RPS24B	0.418484	0.344202
PET191	0.418472	0.422093
MRPL8	0.41846	0.553696
DPS1	0.418131	0.736377
MRPL31	0.417147	0.600034
RTC2	0.41702	0.706787
FMP30	0.41593	0.711107
RPL24A	0.414811	0.3008
HPT1	0.414654	0.553696
YDR222W	0.414096	0.749368
THI72	0.413779	0.506158
DPH1	0.413499	0.700767
CSH1	0.413092	0.701594
IMA1	0.412308	0.487716
TPO1	0.411555	0.809804
HMRA1	0.411325	0.3109
COR1	0.410812	0.880758
AMD1	0.410103	0.599553
ERG12	0.409903	0.829203
BUD4	0.409788	0.510425
RPL11A	0.409764	0.334062
PET494	0.40973	0.662353
MTR2	0.409185	0.886931
YET2	0.408514	0.198004
ENV7	0.408171	1.02772
ALT1	0.408009	0.657892
ATP7	0.407953	1.17706
PEX12	0.407547	0.862197
PRP39	0.407464	0.629234
RGD2	0.407161	0.591332
ODC1	0.407118	0.896489
PFK2	0.407041	0.595194
EFM5	0.406007	0.448304
MDM32	0.405903	0.767746
RPO26	0.405012	0.694141
ALK1	0.404287	0.348686
SYS1	0.404007	0.557376
MSA2	0.403976	0.667188
NRG2	0.403674	0.379567
SCW11	0.402711	0.557468
ERB1	0.402529	0.447387
MRPL44	0.402419	0.272785
ADE1	0.402364	0.918795
LAP3	0.402273	1.01052
RPB2	0.402229	0.763058
ILV6	0.40195	0.67331
SNQ2	0.401395	0.698374
ARN2	0.400582	0.449335
SUA7	0.400354	0.835268
MGE1	0.400117	0.683996
PFK1	0.399404	0.763058
RRP43	0.399354	0.749997
MIC19	0.399109	0.324999
YGL262W	0.398796	0.434831
MDG1	0.398704	1.00064
TPO5	0.398198	0.803775
SPR2	0.397653	0.111178
YER158C	0.397402	0.774178
YNL010W	0.397108	0.534941
MRPS5	0.396623	0.69137
CPA1	0.396273	1.13472
CYC2	0.396048	0.537497
MRPL39	0.395953	0.329547
MST1	0.395506	0.718418
CRT10	0.394736	0.771046
YNR061C	0.394519	0.658727
ORC4	0.394462	0.585142
HOC1	0.393838	0.826056
SPI1	0.393481	0.422477
HPM1	0.392711	0.660734
QCR7	0.391926	0.596345
YMR111C	0.391725	0.654846
SHH4	0.391555	0.572999
TRM7	0.391515	0.518346
GSY2	0.391318	0.817654
MRPL38	0.391301	0.658727
PEX32	0.39062	0.543844
POP8	0.390353	0.205085
ATG38	0.390235	0.862197
YJR112W-A	0.390155	0.550546
YBR201C-A	0.390111	0.552325
YGR066C	0.389972	0.803024
YCR007C	0.389534	0.595019
ERG26	0.3892	0.658727
SLO1	0.388975	0.204548
CWH43	0.388757	0.778393
SPO75	0.388633	0.614517
YMC1	0.388102	0.447387
SUS1	0.387878	0.387537
MIC27	0.386986	0.758701
PRO1	0.386921	0.55147
LOS1	0.386613	0.597121
YDL206W	0.385999	0.533726
GCR1	0.385806	0.63587
ZTA1	0.385146	0.527247
HIR3	0.38503	0.844954
LAM4	0.384477	0.666749
FYV6	0.384024	0.350181
ACK1	0.383769	0.652097
FUS3	0.383652	0.449335
RPL11B	0.383466	0.259491
YFH1	0.38325	0.448404
AGC1	0.383076	0.869654
COX7	0.38289	0.54029
FUR4	0.382794	0.321914
NMD3	0.38268	0.560172
AEP2	0.382497	0.763058
CIT3	0.38215	0.947486
TAH18	0.381805	0.454841
SSB2	0.381708	0.440577
FCF1	0.380907	0.47074
BUD16	0.379232	0.603414
RPA135	0.378981	0.370593
MAL33	0.37887	0.646877
YDR541C	0.378475	0.65877
HSP104	0.378165	1.08124
TBS1	0.377831	0.704995
ADH4	0.377394	0.615183
LYS14	0.37646	0.626746
TRM8	0.376352	0.50177
MAE1	0.376015	0.749437
YBR137W	0.375304	0.736377
IST2	0.375285	0.791232
THP3	0.374449	0.596345
IMG1	0.374076	0.38492
SPL2	0.373968	0.368769
YKR078W	0.373823	0.673466
EHT1	0.373599	1.00127
TPS2	0.373356	0.748458
SIR2	0.373258	0.651708
CDS1	0.373188	0.908791
MIR1	0.373134	0.749437
LST7	0.373033	0.586255
RPL36A	0.37297	0.443039
NCB2	0.372421	0.542287
PGU1	0.372169	0.461702
TMA16	0.372142	0.457353
DBF2	0.371988	0.679213
YIP1	0.371566	0.848333
MRX9	0.371483	0.694141
HNM1	0.371288	0.715894
LRE1	0.371169	0.832199
SDT1	0.37086	0.439061
THI7	0.370765	0.838161
SSH4	0.370644	0.678954
RPS7B	0.370418	0.325797
COX5B	0.370411	0.373637
AIM17	0.369989	0.382706
CSS2	0.369955	0.505887
SPO7	0.369828	0.598165
RSM10	0.369536	0.464457
SST2	0.369351	0.611125
PET10	0.369099	0.935379
YLF2	0.369061	0.420494
OPY1	0.368804	0.715261
UTP13	0.368659	0.255525
TNA1	0.368586	0.54168
IST3	0.368566	0.534941
LYP1	0.368495	0.565605
RPS22A	0.368136	0.252737
PAU2	0.367964	0.339539
PRY3	0.36792	0.512203
FMN1	0.367615	0.684077
CHM7	0.367226	0.598628
#N/A	0.367204	0.706067
CIC1	0.367127	0.397332
VMA22	0.367032	0.611125
PET309	0.366655	0.612036
TRE1	0.366315	0.66769
RPL8B	0.366177	0.337694
ERG24	0.365962	0.563689
RPL6A	0.365858	0.261126
NUR1	0.365771	0.706962
DXO1	0.365749	0.403953
CYS4	0.365282	0.982537
RCL1	0.364702	0.400241
RPL2B	0.364481	0.259698
MAL31	0.364307	0.594709
MIG2	0.363849	0.700412
TDA10	0.363507	0.507834
RTT109	0.362741	0.572957
RPS8B	0.362589	0.258258
MTF1	0.362283	0.429258
DAP2	0.361541	0.664104
RDS3	0.36134	0.193287
RPS21A	0.360903	0.3008
PRM5	0.360422	0.442282
YPK2	0.360137	0.740754
ASC1	0.35996	0.337411
NHP2	0.359565	0.517459
VPS8	0.359434	0.484082
TTI2	0.359179	0.487563
PTK2	0.358752	0.50738
AAH1	0.358453	0.501272
CAF20	0.35831	0.598165
SRF1	0.358277	0.613767
IBA57	0.358222	0.538265
YLL056C	0.358193	0.447387
COG7	0.358186	0.77801
LRP1	0.357958	0.618524
FAD1	0.357868	0.688546
FRA1	0.357604	0.7395
BNA6	0.35676	0.751619
JLP1	0.356306	0.367168
YNL144C	0.356212	0.589038
DUR3	0.355832	0.325697
MRP49	0.355264	0.386624
GFD1	0.354631	0.705068
POF1	0.353906	0.397474
MNT3	0.353344	0.582431
CST6	0.353203	0.498138
LYS9	0.352937	0.595019
COQ5	0.352833	0.752
GLR1	0.352709	0.591633
TIM10	0.352623	0.402224
YMR122W-A	0.352455	0.348785
PET111	0.352058	0.6485
SOD2	0.35183	0.968053
TMA19	0.351142	0.302589
HTL1	0.350913	0.214655
TIF11	0.350638	0.54892
GPB2	0.350044	0.890788
DOG1	0.349477	0.356609
RPP2B	0.348865	0.194047
MRPS28	0.348444	0.548904
GAP1	0.347724	0.194047
CAT2	0.347721	0.968082
MMM1	0.347641	0.695079
YLR326W	0.347056	0.535854
SEF1	0.347008	0.838161
CTM1	0.346876	0.488144
TFS1	0.346846	0.509055
YER076C	0.346564	0.430719
DSD1	0.346489	0.786825
MRPS8	0.345919	0.2696
LSB6	0.345498	0.615183
RAS1	0.344921	0.405289
NSA2	0.344685	0.432698
VPS9	0.344678	0.693391
TDA2	0.344356	0.319463
PEX29	0.343953	0.679213
TRS31	0.343727	0.525827
SNU56	0.343467	0.356609
RTT101	0.343458	0.706787
INO1	0.34303	0.575691
ADK1	0.342792	0.568033
SFK1	0.342646	0.536439
FRE3	0.342471	0.256701
TRM1	0.342268	0.530604
YOP1	0.342106	0.576321
DAN1	0.342065	0.291157
MRP10	0.341787	0.310697
ATP1	0.341524	0.65877
FMP33	0.341459	0.353009
ISF1	0.341459	0.562682
YNR062C	0.341213	0.292336
MRX14	0.341039	0.358672
HAM1	0.340762	0.377028
AVT5	0.340586	0.619319
UBP7	0.340563	0.613767
RTF1	0.340293	0.572957
IRC15	0.340016	0.673466
RIF2	0.33991	0.366939
MOB2	0.339764	0.4427
PUG1	0.339315	0.146076
GTO3	0.33892	0.448173
RNT1	0.337886	0.403953
YDL124W	0.337722	0.711492
HUB1	0.337705	0.237607
MNT4	0.337367	0.536579
UTP23	0.33726	0.350417
EMP46	0.337226	0.301114
VAN1	0.337035	0.478911
NOP10	0.336127	0.356609
ASI3	0.336074	0.45877
YLR042C	0.335873	0.168697
SDS23	0.335727	0.714692
MF(ALPHA)2	0.335423	0.197979
NIS1	0.335377	0.447225
TRM12	0.335169	0.167128
RPL17B	0.335058	0.198607
KRE2	0.334998	0.751529
YDR524C-B	0.334737	0.389871
UBC12	0.334031	0.258344
HMF1	0.333991	0.536439
PNT1	0.333603	0.443039
ILV5	0.333557	0.252288
SEC15	0.332505	0.596345
FMP25	0.332085	0.56798
YJU3	0.331883	0.652454
YMR317W	0.331647	0.585451
RPL18A	0.331581	0.221762
AIM44	0.331415	0.354061
YER121W	0.331319	0.469693
URB2	0.331279	0.341416
MRX3	0.330967	0.679213
SAP185	0.330721	0.694161
PSE1	0.33036	0.596539
RPS23B	0.330005	0.244632
MTR4	0.329866	0.462608
YCR087C-A	0.329544	0.295056
THI80	0.329075	0.366406
PHO5	0.328513	0.356609
DLD1	0.328207	0.78184
COM2	0.326939	0.490881
ATP4	0.326573	0.795201
CMR2	0.32629	0.536439
WSC4	0.32588	0.311621
PUS6	0.325791	0.331842
CTR86	0.325543	0.47725
IDP3	0.325509	0.534941
BFR2	0.325347	0.344807
MRX10	0.325247	0.432152
YJL144W	0.325189	0.236065
PER1	0.324961	0.552824
AMD2	0.324753	0.523834
DAL82	0.324672	0.489279
YNR021W	0.324063	0.400687
SDH4	0.324032	0.865134
FCF2	0.324029	0.40897
PPR1	0.323894	0.350417
AIM33	0.32379	0.439061
TVP23	0.323718	0.537497
MSC1	0.323621	0.501431
MRPL20	0.322922	0.267293
OSH7	0.322056	0.573123
TMN3	0.321474	0.434831
RPR2	0.32129	0.502027
RLI1	0.321057	0.337839
SNT309	0.320406	0.306847
AIM24	0.319769	0.61014
AIM32	0.319316	0.320472
URA1	0.319071	0.299768
PHO4	0.318941	0.597286
RTP1	0.31881	0.572999
CYS3	0.318717	0.525827
ACL4	0.318629	0.527247
MRPL15	0.317549	0.378587
MRPL49	0.31754	0.388217
NUM1	0.317401	0.503668
STB5	0.3169	0.466691
INO2	0.316585	0.353934
RPC17	0.316577	0.198866
ATP3	0.315621	0.771046
YGL114W	0.315557	0.553465
AEP1	0.315554	0.659547
CBP1	0.31546	0.449335
PDC6	0.315358	0.322405
URB1	0.31519	0.516951
RPS4B	0.315184	0.211382
YML020W	0.314923	0.53563
MXR2	0.314832	0.365991
MET4	0.314619	0.556192
YHR112C	0.31394	0.540788
SMD2	0.313786	0.394979
RPL14B	0.313702	0.168443
SAS5	0.313684	0.461192
#N/A	0.313274	0.204902
YGR067C	0.313063	0.370593
IMP3	0.312836	0.285974
GLN3	0.312658	0.621403
IDP2	0.3123	0.791761
CIN10	0.312288	0.410119
YPL162C	0.312132	0.344807
RNR3	0.311648	0.571993
RDS1	0.311383	0.419265
ATG29	0.311364	0.444752
EMP70	0.311124	0.407832
YBL059W	0.311084	0.225124
NOP58	0.310973	0.225124
OST2	0.310557	0.397206
RRP42	0.310237	0.403953
SUR2	0.310045	0.621403
ROG3	0.309946	0.360611
CTS2	0.309808	0.416274
THP2	0.309533	0.259491
NAS6	0.309469	0.283026
TSR1	0.309153	0.541567
NCW2	0.308964	0.553696
SDH6	0.308905	0.386624
ARA1	0.308834	0.56216
GPR1	0.308784	0.489728
PHO3	0.308659	0.318629
ESL1	0.308404	0.537619
PKR1	0.308326	0.356609
PRS4	0.307987	0.516706
STN1	0.307926	0.439061
CBP3	0.307724	0.531254
MSD1	0.307403	0.484082
FYV7	0.307402	0.272785
AIM19	0.307307	0.540788
MHP1	0.307051	0.5639
PTK1	0.307051	0.505457
MRPL7	0.306417	0.476235
TRM11	0.306148	0.276871
TEF1	0.306104	0.378634
ERP6	0.305643	0.389871
DSS1	0.305604	0.496212
RIM9	0.305443	0.356609
IZH3	0.305435	0.416747
YPT35	0.305195	0.333319
CUE2	0.30516	0.311621
RPP0	0.304917	0.18467
GIP1	0.304752	0.350417
CIT1	0.303807	0.666749
INN1	0.303663	0.415475
YLR460C	0.30364	0.187913
MMP1	0.303335	0.364768
MEF1	0.303144	0.563627
MNN4	0.30304	0.511693
YDL177C	0.30299	0.335722
MRPL1	0.302677	0.323253
HRQ1	0.302425	0.565605
BYE1	0.302416	0.507731
TPO3	0.301654	0.518346
OAF3	0.301257	0.448304
RPL15A	0.301118	0.252288
SSC1	0.301022	0.528332
LEA1	0.300961	0.426232
YTM1	0.30093	0.304695
MSH1	0.300732	0.403953
NCS2	0.3	0.451392
CBP6	0.299891	0.262194
FRE1	0.299781	0.658727
IAH1	0.299763	0.468645
YBL028C	0.299603	0.239577
PUT1	0.299019	0.553696
PFA5	0.298469	0.443039
NCR1	0.297847	0.525827
RPB4	0.297764	0.27034
VPH1	0.297626	0.459577
EFM1	0.296367	0.47074
MEO1	0.296117	0.227501
RSN1	0.29609	0.370225
OPI10	0.295698	0.435686
RIM8	0.294963	0.439982
MOH1	0.294679	0.350417
TPS3	0.294636	0.487563
NGL1	0.293691	0.47074
CCH1	0.292836	0.461192
INM1	0.292434	0.354941
PEX2	0.292421	0.407832
KAP122	0.292409	0.378365
NMA1	0.291643	0.336591
TCM62	0.291614	0.402224
MCM22	0.291555	0.241755
CBS2	0.291311	0.375464
YGL039W	0.291148	0.264871
CIN2	0.290678	0.434393
CTH1	0.290457	0.448173
RAD30	0.289942	0.403953
SFM1	0.28969	0.357206
UTR4	0.289511	0.462892
BST1	0.28924	0.421183
RKI1	0.289129	0.20197
VBA5	0.288493	0.421563
PYC1	0.28843	0.548909
FYV4	0.288044	0.257746
HMX1	0.287653	0.536579
FMP46	0.287646	0.219365
UBA4	0.287474	0.379012
PRO2	0.287273	0.403953
ATP22	0.287059	0.410868
BOL1	0.287007	0.288904
GPI12	0.286989	0.293055
MRM2	0.286789	0.417289
YPR196W	0.286729	0.354338
ADR1	0.28659	0.618468
YDR338C	0.286578	0.398952
YJR142W	0.286441	0.496341
ERJ5	0.286353	0.48614
ADO1	0.286151	0.360519
YLR307C-A	0.285877	0.520289
YEF3	0.285861	0.227708
RPB10	0.285619	0.139687
RRI2	0.285601	0.45877
SHH3	0.28556	0.303477
YOR111W	0.285349	0.252288
YFR045W	0.284658	0.325797
PDC5	0.284488	0.275116
MPM1	0.284363	0.533726
YPR1	0.28376	0.540788
SMK1	0.283357	0.302589
NOP13	0.283162	0.167128
FAS2	0.282455	0.345264
MIC60	0.282353	0.464457
MTF2	0.282226	0.388217
VPS3	0.281908	0.523287
YML6	0.281638	0.461192
BGL2	0.281541	0.447849
AIM46	0.281529	0.436928
BAS1	0.281476	0.556192
KCC4	0.281403	0.496901
ESF1	0.280593	0.328035
PEX27	0.280573	0.314284
DSE3	0.280028	0.261729
NOP1	0.279798	0.232848
PBA1	0.279175	0.431471
SHE9	0.278826	0.311621
SIP4	0.278312	0.447865
UTP9	0.277917	0.356609
PNC1	0.27788	0.62094
MKK2	0.277678	0.459934
MPH1	0.277416	0.445673
GAL80	0.277335	0.419631
SSL2	0.27719	0.505457
YTP1	0.277188	0.505887
YLR179C	0.276815	0.311309
YEA4	0.276766	0.277576
PRM2	0.276692	0.214655
STL1	0.27657	0.310375
SYO1	0.276175	0.238789
ASA1	0.276066	0.402304
TOM7	0.275918	0.185777
STM1	0.275852	0.244632
COS6	0.275536	0.439982
YHR140W	0.275355	0.377509
SGF29	0.274805	0.447899
YLR257W	0.274719	0.56216
UBX7	0.274503	0.48284
RPL27A	0.2743	0.154986
TCA17	0.273892	0.144425
SRB8	0.273688	0.344807
SLM1	0.273628	0.440502
IMP2	0.272847	0.239577
COQ10	0.272722	0.267293
AGP3	0.272317	0.434393
HST4	0.272043	0.277233
HEM15	0.272008	0.54892
BRL1	0.271723	0.342497
YJL107C	0.2716	0.273369
BAT2	0.271378	0.510971
PIR5	0.271259	0.325697
SAC3	0.270957	0.447899
ADE8	0.270921	0.389871
OSH6	0.270867	0.373637
NCS6	0.270813	0.422012
TSA1	0.270606	0.402224
GEM1	0.270298	0.447899
IMA5	0.270032	0.229181
THP1	0.269851	0.306722
MRS2	0.269731	0.375464
TEF2	0.269488	0.302827
SPP2	0.268839	0.339539
KIN3	0.268765	0.225158
TRM44	0.268753	0.29356
NCE103	0.268468	0.618524
KXD1	0.26812	0.327393
BSP1	0.267509	0.434423
SMP1	0.266717	0.192287
QDR1	0.266489	0.320472
SPR6	0.266393	0.29126
EMW1	0.266379	0.385589
LAA1	0.265819	0.3796
SDH8	0.265326	0.503668
RTC6	0.265132	0.235565
RPC40	0.264326	0.27692
ARP10	0.263643	0.135274
RPS23A	0.263537	0.197979
CRC1	0.262952	0.574408
NUT2	0.26275	0.185702
PSF1	0.262421	0.283835
YPL191C	0.262327	0.358209
CIS1	0.262096	0.172063
SFB2	0.261774	0.356609
RPS8A	0.261517	0.156006
RSA4	0.261458	0.170759
NEJ1	0.261402	0.0837539
SGA1	0.261395	0.397332
YAP5	0.261176	0.376036
CDC40	0.260864	0.407882
PMR1	0.260635	0.345001
PRP46	0.260581	0.325797
JNM1	0.260368	0.393907
ERG27	0.260156	0.501431
RPS29B	0.259458	0.200919
NDE1	0.259175	0.324999
NOG1	0.25897	0.297612
PAU5	0.258663	0.159793
SOF1	0.258659	0.284798
IML2	0.258545	0.420257
PST1	0.25812	0.338067
PEX21	0.25802	0.520924
SKI3	0.257706	0.449335
GPM2	0.257488	0.419414
HXT1	0.257124	0.257542
RRP9	0.256708	0.375778
SUI3	0.256521	0.307545
PEP5	0.256463	0.420494
GRX2	0.256168	0.377028
PAU7	0.256148	0.167444
MRPL51	0.2555	0.368737
TMS1	0.255428	0.306847
GPH1	0.255361	0.443039
AYT1	0.254842	0.214655
AAT1	0.254696	0.344807
MDM31	0.254595	0.370593
JAC1	0.254553	0.176906
RPS1B	0.254103	0.187445
UBC11	0.254014	0.182726
COX17	0.253978	0.106393
RPS0B	0.253836	0.180771
PET20	0.253821	0.451933
ERV15	0.253733	0.173253
RPS31	0.253227	0.146601
MSR1	0.252583	0.356982
RPS5	0.252031	0.151954
RPS9B	0.251482	0.1818
YNL046W	0.251412	0.24507
HEM1	0.251302	0.339539
RAD9	0.251183	0.386396
RAM2	0.250653	0.331842
RPL13B	0.25048	0.141694
SUA5	0.250305	0.273369
MGT1	0.250235	0.339539
FMC1	0.249957	0.185681
MED4	0.249696	0.292097
JIP4	0.249562	0.492234
NFU1	0.249358	0.359787
YLR050C	0.249066	0.375778
UBA1	0.248884	0.458924
ISA1	0.24872	0.462892
VTH1	0.248522	0.375464
YPF1	0.2477	0.454308
SKS1	0.247468	0.356609
FMP42	0.247004	0.301114
YNL193W	0.246952	0.306847
RGA2	0.246582	0.187795
REV3	0.246574	0.284798
AVT6	0.246026	0.385894
CAF130	0.245765	0.387537
POL30	0.245634	0.324999
RPA34	0.245238	0.194047
PAR32	0.245189	0.350417
REF2	0.245107	0.285652
CWC24	0.244981	0.185702
APL1	0.24474	0.38492
RRP45	0.244555	0.283247
KHR1	0.244028	0.276723
MOG1	0.243707	0.296878
SNF8	0.243653	0.350602
GUA1	0.243431	0.194047
RPH1	0.243358	0.367833
GYP8	0.243257	0.251316
YKL068W-A	0.243058	0.142474
QRI7	0.243049	0.219365
RSC3	0.242224	0.245302
SEC1	0.242181	0.403953
BCP1	0.241844	0.235135
RAI1	0.241772	0.273369
IKI3	0.241541	0.397474
GPI8	0.241138	0.321721
PDR15	0.240581	0.438566
YKL070W	0.240567	0.175506
SLD7	0.240102	0.213543
ATC1	0.240014	0.123644
RPL32	0.239267	0.18467
RPA190	0.239237	0.227694
MRX8	0.238687	0.268236
BRR1	0.238074	0.305841
APM4	0.237709	0.375193
MRT4	0.237542	0.189617
YMR085W	0.237326	0.396755
NAT2	0.237046	0.347277
CYT2	0.236943	0.325797
RMD1	0.236909	0.293055
CIT2	0.236641	0.319307
RPS28B	0.236551	0.17652
IES5	0.236232	0.198607
SOL3	0.235998	0.216921
BUD17	0.235793	0.276723
PGA1	0.23534	0.207477
SLX1	0.235027	0.320472
MRP1	0.235014	0.331934
SPS100	0.234982	0.271716
MDV1	0.234713	0.337839
ASE1	0.234659	0.373642
CIN5	0.234471	0.311621
MHT1	0.234401	0.165447
RBH1	0.233502	0.275656
TDA1	0.23327	0.402224
OCA2	0.233016	0.259491
VAB2	0.232859	0.221762
ADY4	0.232598	0.22563
BIO4	0.232352	0.214594
NOC2	0.232149	0.213483
MRPL3	0.232084	0.347917
SDH7	0.231871	0.204807
IRC20	0.231606	0.320472
GAL4	0.231383	0.38492
PHO8	0.231351	0.400687
UIP3	0.231024	0.273369
ESF2	0.230853	0.258258
MRP7	0.230693	0.357206
RPL12A	0.230647	0.13648
SMF2	0.230183	0.308593
SFA1	0.229824	0.3008
UTP6	0.229633	0.20999
BUD27	0.22959	0.254036
VMA8	0.229391	0.327017
ERV14	0.229083	0.252288
CDH1	0.228945	0.360865
OXP1	0.228904	0.249087
DIN7	0.228765	0.297969
BCH2	0.228677	0.287243
RPL43B	0.228548	0.123618
TGL5	0.228503	0.312114
SWM2	0.228151	0.159066
HBT1	0.227919	0.297595
GLK1	0.227487	0.369741
UTR1	0.227304	0.392283
MRP21	0.227266	0.244329
HMT1	0.227084	0.273369
YHR022C	0.226772	0.124261
PBI2	0.226527	0.421759
CKA1	0.226267	0.267426
MRPL9	0.226255	0.283247
YDR341C	0.226132	0.326665
HER2	0.2261	0.233892
GRX7	0.225801	0.258344
STE7	0.225606	0.350948
#N/A	0.225523	0.243691
VTC3	0.225389	0.216679
MEH1	0.225359	0.252288
ACE2	0.225306	0.217755
PET100	0.225284	0.153743
PHO80	0.225248	0.283247
DIP2	0.224956	0.275656
AKL1	0.224843	0.390414
FRE5	0.224639	0.279724
SWT1	0.224063	0.293893
PRP16	0.22398	0.375464
NKP1	0.223884	0.154986
SYM1	0.223809	0.261729
NRG1	0.223282	0.287855
YHI9	0.223125	0.219365
TCD2	0.223096	0.318501
HRT3	0.222923	0.280557
UGA2	0.222875	0.356609
YMR099C	0.22275	0.388707
UTP14	0.222598	0.241153
YAL063C-A	0.222561	0.0585356
GPI15	0.222033	0.20083
HSP150	0.222006	0.389871
GRS2	0.221326	0.267637
PRP24	0.220922	0.252288
TPD3	0.220883	0.358466
GPB1	0.220659	0.356982
ENB1	0.219496	0.267234
SLX8	0.219431	0.29528
RRP8	0.219161	0.173932
ZAP1	0.218919	0.269434
AIM4	0.218716	0.185777
PRP40	0.218647	0.282516
BEM1	0.218605	0.256925
NTA1	0.218556	0.318232
YPT6	0.218522	0.289025
ROM1	0.218495	0.258483
RGP1	0.21839	0.273369
YDL180W	0.217746	0.344807
REV1	0.217733	0.18467
RPA12	0.217436	0.0855867
STE12	0.216583	0.224209
UTP11	0.216209	0.154692
THS1	0.216195	0.281164
MAM33	0.215974	0.275116
ATP5	0.21595	0.377509
MSM1	0.215651	0.258344
LYS5	0.21501	0.15883
GSP1	0.214602	0.198607
DOA4	0.2145	0.345264
HFD1	0.214474	0.357823
BAR1	0.214462	0.159347
SSN3	0.214199	0.259698
TRM3	0.213627	0.262283
STE14	0.21362	0.167444
DBP10	0.213466	0.294355
ARO80	0.213458	0.285404
PEX15	0.213153	0.296459
MRK1	0.212976	0.256539
RGA1	0.212734	0.382706
TIM13	0.212429	0.194047
AVT7	0.212191	0.283247
ELO3	0.212117	0.168443
UBP1	0.211909	0.296459
ARN1	0.211828	0.290915
WHI2	0.21178	0.311621
ABZ1	0.211223	0.272121
GEF1	0.210996	0.273369
SIC1	0.210336	0.237841
BUR6	0.210164	0.258819
TIM54	0.210151	0.28814
PUS9	0.209539	0.227085
MSK1	0.209362	0.248297
BSC2	0.209311	0.273369
GET1	0.208925	0.24573
HIS6	0.208712	0.189148
BIT2	0.208416	0.223886
ROT2	0.208381	0.288775
TFB6	0.208317	0.248564
GUP2	0.208236	0.167444
IES1	0.208117	0.307779
BNA4	0.207962	0.322419
SPG4	0.207822	0.307779
RSA1	0.207798	0.297969
ALD3	0.207643	0.245302
COS10	0.207642	0.150756
ERC1	0.207538	0.294157
DAL5	0.207389	0.0278093
HIS2	0.207363	0.215415
LEU9	0.207179	0.165019
ART10	0.206356	0.287724
YKL023W	0.20635	0.25766
CST26	0.206339	0.262283
ENT3	0.20593	0.249016
YPR098C	0.205772	0.246358
SAS10	0.205763	0.297612
STE5	0.205681	0.224209
FRD1	0.20559	0.338067
ELP3	0.205521	0.196608
LOT6	0.205336	0.176906
LPD1	0.20483	0.276723
NAM2	0.204553	0.259698
MAS1	0.204214	0.308218
SDD2	0.20378	0.144583
FRE4	0.203768	0.246358
YNR066C	0.203745	0.261729
PPT2	0.203698	0.118591
MSH3	0.203626	0.231367
SNX3	0.20356	0.219365
FUN30	0.203357	0.293055
SKI6	0.203353	0.173182
CAF120	0.203188	0.322115
SER2	0.202854	0.20999
SYG1	0.202671	0.252288
PGS1	0.202572	0.214203
SOL2	0.202437	0.323471
BAP2	0.202129	0.315182
ACC1	0.201973	0.219365
PHA2	0.201932	0.249087
TVP18	0.20187	0.27034
COQ11	0.201742	0.263354
LIA1	0.201611	0.153737
GWT1	0.201571	0.135563
YHL012W	0.201057	0.14791
EFB1	0.200878	0.177095
DID4	0.200718	0.297969
YHR097C	0.19983	0.289094
DPP1	0.199824	0.253809
TRF5	0.199331	0.157908
BER1	0.198759	0.184732
LAS21	0.198756	0.315182
MDR1	0.198704	0.271716
RPB8	0.198569	0.172509
MMT2	0.198532	0.311621
MCM10	0.198443	0.20986
RRT6	0.198202	0.245279
MNT2	0.198177	0.205716
SSL1	0.198138	0.280557
DET1	0.197387	0.219365
YFR057W	0.196759	0.110628
MAK11	0.196383	0.271365
CAN1	0.196273	0.11713
CCM1	0.196263	0.191552
FRT1	0.195884	0.251059
TSC13	0.195174	0.221762
POP7	0.195134	0.151954
GPT2	0.194447	0.280755
YNL040W	0.194399	0.27741
ECM32	0.194284	0.228656
RPP1B	0.194195	0.124933
MDH1	0.194095	0.265152
#N/A	0.19409	0.114302
DAK2	0.193946	0.13126
BNS1	0.193581	0.159347
TGL3	0.193224	0.292259
CAK1	0.192854	0.160278
TFC3	0.192839	0.21193
HIP1	0.192792	0.244632
RPS25B	0.192444	0.118898
#N/A	0.192367	0.155972
MAK16	0.192333	0.198547
SSN8	0.192034	0.194589
YOR296W	0.191995	0.259491
YLR001C	0.191767	0.247579
BIT61	0.191675	0.150756
MTG1	0.190869	0.121928
YML079W	0.190655	0.170759
URA6	0.190429	0.134693
PTR2	0.190186	0.198719
ATP20	0.190155	0.237841
MRP4	0.19014	0.22066
YPL108W	0.190085	0.143769
FUN14	0.18994	0.242365
UBP11	0.18938	0.241621
TPN1	0.189077	0.27034
YPK9	0.189064	0.244076
PSO2	0.189053	0.225124
RPS26B	0.188987	0.102599
SNC2	0.188557	0.221762
MSF1	0.188444	0.21193
LDB18	0.188369	0.109302
PET123	0.188332	0.163379
FOB1	0.188313	0.22077
SPT23	0.188175	0.301114
YNL122C	0.187946	0.110628
SEC53	0.187638	0.164881
UGO1	0.187319	0.257542
ARC19	0.187255	0.277233
MRP17	0.187229	0.121996
OYE3	0.187166	0.143279
MAK10	0.1871	0.235251
GIP3	0.187022	0.229181
TOR1	0.186487	0.25591
GRE3	0.186242	0.218655
YMR102C	0.186079	0.233066
GTT1	0.185915	0.214655
RPS13	0.185901	0.0949625
HBN1	0.185845	0.0905663
POL4	0.185635	0.259491
MRF1	0.185387	0.199975
AVT3	0.185005	0.318324
GTR1	0.184998	0.20896
COX15	0.184928	0.275116
HMI1	0.184661	0.183088
VBA4	0.184593	0.13983
CTK3	0.184518	0.161297
MRX11	0.184437	0.12317
DAP1	0.184428	0.284298
PHD1	0.184046	0.160502
FAT3	0.183962	0.197627
SAW1	0.183744	0.16483
TMA108	0.183604	0.299085
ESS1	0.183151	0.242365
RBG1	0.183118	0.148789
YKR015C	0.18262	0.168443
CTP1	0.182515	0.123644
SEC21	0.18226	0.162844
MRX12	0.182124	0.165834
POC4	0.181967	0.117382
HAP4	0.181924	0.260814
AME1	0.181884	0.18467
DBR1	0.181867	0.200919
VHS3	0.181683	0.20986
RPS0A	0.181635	0.117864
YFR006W	0.181613	0.177095
NGL3	0.181549	0.180357
LEE1	0.181546	0.240198
SHY1	0.18142	0.212704
SSO2	0.181376	0.233626
PPH21	0.181304	0.272785
YNR029C	0.181256	0.233626
ESBP6	0.181235	0.291157
PEX28	0.181182	0.267426
DBP6	0.181132	0.173182
ATP2	0.181121	0.240803
CKB1	0.181098	0.249087
USO1	0.180854	0.197911
YGR161W-C	0.180822	0.130197
ACP1	0.180675	0.219365
MED6	0.180388	0.185702
MET31	0.1802	0.130197
ALA1	0.179883	0.20896
FAP7	0.179747	0.153737
DIM1	0.179546	0.17884
VIP1	0.179081	0.20896
MATALPHA2	0.178655	0.153712
RPS10A	0.178569	0.110702
SUE1	0.178278	0.222437
VMA10	0.17824	0.221762
KIN28	0.17819	0.182833
YGR122W	0.178185	0.151954
RFC5	0.177972	0.164616
ATP16	0.177631	0.232166
RIB7	0.177628	0.182833
RPL31A	0.177449	0.155115
RPL12B	0.177212	0.129137
YPR172W	0.177045	0.237841
ABP1	0.17677	0.27944
MRPL17	0.176745	0.189606
ART5	0.176511	0.20269
ARC18	0.176186	0.194047
COX10	0.175537	0.18626
PRM15	0.175471	0.232492
MRX6	0.175088	0.165834
KGD2	0.17488	0.259491
YIP4	0.174697	0.200113
GUD1	0.1746	0.204902
VID27	0.174542	0.249767
RIM20	0.174492	0.237595
GRX5	0.173833	0.189606
MAG2	0.173711	0.219365
PKH1	0.173097	0.230559
ATG20	0.173084	0.254581
LAG2	0.173026	0.223886
ETR1	0.173019	0.275656
TUF1	0.17247	0.165347
GIR2	0.171982	0.190038
SPA2	0.1718	0.237841
FLO10	0.171745	0.173182
CEP3	0.171476	0.190402
EGD1	0.171403	0.165347
RSM7	0.171345	0.198683
ASR1	0.171083	0.121928
SAC1	0.170863	0.189967
CHC1	0.170088	0.174375
PSF3	0.16986	0.124261
CIR1	0.169719	0.170004
RMD9	0.169537	0.192287
CBP4	0.169382	0.101327
YHC1	0.169153	0.172541
VFA1	0.169149	0.165019
ETT1	0.169101	0.194047
STB6	0.169041	0.133607
RRD1	0.168994	0.183988
NHA1	0.168715	0.236065
PEX10	0.168715	0.202625
OM45	0.168674	0.133872
PXR1	0.168643	0.140369
GEP4	0.16847	0.168697
HMRA2	0.16757	0.141694
REG2	0.167433	0.163188
CCA1	0.166576	0.194047
SSZ1	0.166218	0.167036
RPP2A	0.166102	0.0903007
COS111	0.165485	0.224517
RPL36B	0.165456	0.0924685
SPT5	0.165334	0.247514
APE4	0.165256	0.176906
YHL044W	0.165136	0.0958395
ROD1	0.164961	0.182522
APC2	0.164786	0.192959
DCS1	0.164737	0.215131
ASG1	0.164645	0.244076
PHO86	0.164447	0.192287
MRPL6	0.164339	0.159347
PIB2	0.164263	0.163017
RCR2	0.164212	0.178331
YDR124W	0.164159	0.144737
PEP1	0.164093	0.242365
HLR1	0.163776	0.165447
RIB4	0.163612	0.163687
YCR051W	0.163584	0.167864
DIA1	0.163282	0.120627
CMK1	0.163268	0.173182
COQ9	0.162977	0.171485
SLA2	0.162888	0.247986
SHQ1	0.162629	0.107954
SPT6	0.16261	0.20896
CDC6	0.162575	0.136395
LIP2	0.162535	0.171134
CFD1	0.162526	0.167864
RRG9	0.162185	0.165834
PIR3	0.162182	0.119504
YET1	0.162039	0.225619
NPP1	0.161919	0.233626
XDJ1	0.161635	0.165347
YCP4	0.161377	0.22563
RNH203	0.161361	0.115243
RKM3	0.161202	0.15733
BOP3	0.161173	0.154986
COX18	0.161151	0.105494
DIE2	0.16096	0.175297
IMD2	0.160907	0.0626238
FZO1	0.160611	0.233668
MED8	0.160511	0.150458
ACT1	0.160301	0.164503
STP4	0.160188	0.20827
ATG40	0.159883	0.179784
BEM2	0.159452	0.194047
PIS1	0.159418	0.166398
COA1	0.158581	0.16483
TIP41	0.158277	0.197134
ARF2	0.158151	0.153067
BDH2	0.158084	0.175297
SLM2	0.157913	0.15315
ERD1	0.157626	0.150756
MRS6	0.157531	0.244076
SIR3	0.157459	0.197134
SNP1	0.157032	0.143279
APN2	0.15658	0.140369
DUS4	0.156482	0.109822
HSP10	0.156125	0.156373
NUP170	0.155849	0.20896
TIM22	0.155782	0.133872
BRE4	0.154823	0.179784
RRP46	0.153939	0.162844
PET130	0.153753	0.162844
ADH3	0.153737	0.157956
YPL257W	0.153644	0.109901
YPR089W	0.153217	0.162844
OCA6	0.152535	0.156896
LTV1	0.152527	0.153057
PXP1	0.152224	0.210776
RRT12	0.151818	0.0947975
YAF9	0.151531	0.144425
PRP19	0.151255	0.16286
RSM26	0.151199	0.128207
NHP10	0.151145	0.150919
LSP1	0.151135	0.236299
MRPS16	0.151105	0.0703628
HCS1	0.151086	0.167444
REV7	0.150627	0.149721
SIT1	0.150608	0.134499
AIM23	0.150316	0.148322
RPL19A	0.150245	0.12155
SPE4	0.150073	0.11578
YJL193W	0.15005	0.139533
UTP22	0.149924	0.116821
PDR18	0.149917	0.188499
HSP26	0.149729	0.142474
RPS4A	0.149717	0.0837539
NSG2	0.149527	0.150756
TMA7	0.149245	0.119533
CYC3	0.149149	0.181792
EBP2	0.148661	0.146658
TEF4	0.148649	0.121928
DUF1	0.148643	0.175506
SEC9	0.148603	0.205618
YNL058C	0.148464	0.124261
RSB1	0.14844	0.165347
RPS20	0.148312	0.0773816
PET117	0.148179	0.103012
PDX1	0.148171	0.219365
IRC3	0.148055	0.167128
YIL077C	0.147968	0.165834
DIA4	0.147942	0.123948
PAC1	0.147831	0.11576
RIM2	0.147732	0.155132
MRPL40	0.147418	0.140369
ORC3	0.147354	0.0950072
GPA1	0.146908	0.121928
DER1	0.146869	0.123948
STP2	0.146863	0.209768
YKL091C	0.146861	0.142188
RRP3	0.146746	0.0921583
GSH1	0.146606	0.165158
RFU1	0.146599	0.0781408
PHO13	0.146566	0.12317
RAD14	0.146207	0.116539
CSG2	0.146072	0.189967
BIK1	0.145955	0.170476
MSS2	0.145881	0.100666
AQY1	0.145479	0.189878
YDL086W	0.145477	0.194047
ATP14	0.145335	0.206791
YAL037W	0.145312	0.111988
YJL218W	0.145071	0.149721
RPC10	0.144946	0.0734676
UTP25	0.144905	0.152541
YPR127W	0.144796	0.170837
YKU70	0.144457	0.140882
CCZ1	0.144383	0.154616
MCP2	0.144241	0.167128
ARA2	0.144045	0.192959
YJR015W	0.143962	0.163687
YNR063W	0.143687	0.132899
ATP11	0.143582	0.146343
BUR2	0.143237	0.143279
PEX3	0.143176	0.185702
JIP5	0.143162	0.189606
RLP7	0.143157	0.113789
YMR262W	0.143129	0.130815
RCF2	0.143105	0.131888
YPL150W	0.142396	0.192959
YMR155W	0.142235	0.167323
GRS1	0.142108	0.1357
RAD18	0.142053	0.123454
RGC1	0.141916	0.180357
UBP12	0.141116	0.172541
HEM13	0.140863	0.121996
RHB1	0.140636	0.12317
DNL4	0.139914	0.163188
TSC11	0.139891	0.130581
DDL1	0.13958	0.140369
NCE101	0.139567	0.0625492
SYC1	0.139442	0.0879378
RPL8A	0.139289	0.0808995
EMI2	0.139219	0.193868
YIR014W	0.138845	0.129163
PEX4	0.138642	0.121928
PHO81	0.138592	0.178353
YPR147C	0.138499	0.158846
TDA3	0.13843	0.198866
RIX7	0.138392	0.0946439
YDR248C	0.138385	0.120374
NTR2	0.138112	0.158087
YLR108C	0.138089	0.123351
GIS2	0.137634	0.170759
GTF1	0.137442	0.144501
YGR125W	0.137035	0.164627
DLS1	0.136862	0.0985899
YDL157C	0.136538	0.111988
CIA1	0.136537	0.132338
IRE1	0.136444	0.153342
KAR1	0.136365	0.0986578
YCR023C	0.136111	0.139687
AVT2	0.135971	0.149721
BPL1	0.135849	0.157272
DUR1,2	0.135693	0.0233526
DBP7	0.135382	0.109822
RRP12	0.135355	0.115473
RSM25	0.134954	0.11034
CTF19	0.134822	0.132737
SWC3	0.134661	0.149721
RPL23B	0.134328	0.0924685
ECM3	0.13427	0.111311
SSK22	0.133489	0.153653
YML119W	0.133381	0.117266
#N/A	0.133243	0.0842453
GND1	0.133013	0.100687
RPL38	0.132929	0.0841244
TCB1	0.13291	0.180596
RIX1	0.132752	0.0947447
NUT1	0.132737	0.165347
[truncated: 3,365 more rows]

## Sheet: wildtype vs. WHI5-AA
GeneName	log2FoldChange	neglog10(padj)	EMG	SBF
ZIP2	-0.265453	0.0980547	yes
ZIP1	-0.582552	0.263483	yes
YSR3	-0.0317806	0.00866036	yes
YIR016W	0.23167	0.119558	yes
YGL081W	-0.641638	0.264387	yes
YDR018C	-0.0127747	0.00426287	yes
YCR061W	0.165924	0.0607387	yes
VNX1	-0.169322	0.0585672	yes
SPT21	-0.124277	0.041965	yes
SPO16	-0.205878	0.0575942	yes
SPO13	-0.543903	0.244393	yes
SPO11	-0.173471	0.0367294	yes
SPO1	-0.375344	0.14718	yes
SMC6	-0.274839	0.160748	yes
SEN34	-0.503328	0.357977	yes
SCC2	-0.408049	0.160748	yes
SAE3	-0.333441	0.0516277	yes
RNR1	0.107053	0.0200705	yes
RNP1	-0.910183	0.357977	yes
RNH201	0.219921	0.0795263	yes
RMA1	0.335619	0.114873	yes
RED1	-0.49532	0.207408	yes
REC8	-0.479265	0.171145	yes
REC114	-0.812158	0.978097	yes
REC102	-0.178814	0.0414867	yes
PRI2	-0.18019	0.0464979	yes
PRD1	-0.218109	0.0516277	yes
POL2	-0.325537	0.203504	yes
POL1	-0.178842	0.0620985	yes
PMS1	0.102373	0.033162	yes
PDS5	-0.469102	0.368043	yes
PCH2	-0.917134	0.81045	yes
NUS1	-0.227166	0.0383851	yes
NSE4	-0.0943451	0.0286297	yes
NDJ1	-0.54608	0.238908	yes
MSH5	-0.497642	0.19009	yes
MSH4	-0.516054	0.196195	yes
MRC1	-0.263609	0.160748	yes
MND1	-0.220559	0.044926	yes
MER1	-0.46129	0.301381	yes
MEK1	-0.441234	0.109217	yes
MEI5	-1.11538	0.929102	yes
MEI4	-0.509577	0.16056	yes
ILM1	-0.161634	0.0460428	yes
ICL2	-0.748503	0.695052	yes
HOP1	-0.284402	0.0614758	yes
HMG2	-0.187818	0.0464979	yes
HED1	-0.536333	0.221429	yes
HCM1	-0.0798635	0.0262848	yes
FKS3	-0.584549	0.357977	yes
ESC8	-0.15061	0.0516277	yes
ECO1	-0.145894	0.041965	yes
ECM11	-0.725675	0.239281	yes
DPB2	-0.0135746	0.00426287	yes
DOC1	-0.64077	0.222951	yes
DMC1	-0.546866	0.16056	yes
CWH41	0.0141693	0.00426287	yes
CTF4	0.0748267	0.0252691	yes
CST9	0.010419	0.00333572	yes
CSM4	-0.570056	0.162664	yes
CDC45	-0.317699	0.207408	yes
CDC21	-0.240414	0.0757491	yes
BUB3	0.0406689	0.0092102	yes
ASF1	-0.613385	0.440493	yes
SWE1	0.197799	0.0516277	yes	yes
TOS4	0.199551	0.0607387	yes	yes
AGE1	0.619345	0.264387		yes
AGP1	1.06515	1.07756		yes
ALG14	0.227257	0.0620985		yes
AMF1	0.312405	0.0846567		yes
AQR1	0.476369	0.146038		yes
BBP1	0.107559	0.0275496		yes
BUD9	0.367492	0.16056		yes
CAP1	0.0875755	0.0211567		yes
CBF2	-0.237281	0.095991		yes
CCW12	1.01913	1.1979		yes
CIS3	0.638169	0.156092		yes
CLA4	-0.213651	0.108178		yes
CLB2	-0.0606399	0.0103348		yes
CLN1	0.784189	0.51645		yes
CLN2	0.0334766	0.0092102		yes
CLN3	0.104196	0.024849		yes
CRH1	0.639487	0.765752		yes
CSI2	0.803127	1.02676		yes
CWP1	0.285863	0.0489549		yes
CWP2	0.0312821	0.00717138		yes
ECM33	1.09934	2.35975		yes
ENV9	0.173561	0.0605321		yes
ERG11	0.340329	0.158926		yes
ERG4	0.323526	0.171339		yes
EXO5	0.200862	0.0678395		yes
FKS1	0.307878	0.154966		yes
GAS1	0.953664	1.9523		yes
GAT2	-0.310279	0.16056		yes
GFA1	-0.227841	0.0756477		yes
GIC1	0.198752	0.0607387		yes
GIC2	0.210533	0.0845253		yes
GTB1	-0.15819	0.0607387		yes
HHO1	-0.152174	0.0434746		yes
HO	-0.208482	0.0437195		yes
HOG1	0.110712	0.0301338		yes
HSL1	0.189581	0.0733072		yes
HTZ1	-0.121324	0.0230766		yes
HXT3	0.214454	0.0460428		yes
IPT1	0.418134	0.294713		yes
KCH1	-0.113671	0.0325943		yes
KRE6	0.300665	0.175475		yes
LAC1	0.220381	0.0972564		yes
LTE1	-0.180024	0.0561188		yes
LYS20	1.34593	0.576729		yes
MIT1	-0.0952667	0.0325943		yes
MNN5	-0.0191623	0.00426287		yes
MSB2	0.172554	0.0414867		yes
NAN1	0.178387	0.0620985		yes
NDD1	-0.423211	0.280049		yes
NUD1	0.06072	0.0127669		yes
PCL1	1.45969	1.20861		yes
PCL2	0.31874	0.127129		yes
PDR1	-0.314731	0.199885		yes
PDR16	0.353979	0.183618		yes
PET54	-0.236313	0.0845253		yes
PET9	0.330178	0.143226		yes
PIL1	-0.255462	0.0980906		yes
PLB3	-0.0735704	0.0231782		yes
PLM2	0.158754	0.044926		yes
PMC1	0.149356	0.0464979		yes
POG1	-0.0473376	0.0107625		yes
PPN1	-0.452739	0.241565		yes
PRY1	0.246029	0.0460428		yes
PTH4	-0.646661	0.258539		yes
RAX2	0.452866	0.241565		yes
RPL18B	0.350277	0.0733072		yes
RPL37A	0.884708	0.671769		yes
RSR1	-0.0248763	0.006701		yes
SCW4	0.157667	0.0614758		yes
SED1	-0.382347	0.158926		yes
SFG1	0.0176269	0.00426287		yes
SIM1	0.717182	0.848491		yes
SKM1	0.117507	0.041965		yes
SLM4	0.0668988	0.0157929		yes
SNF11	-0.130088	0.0333216		yes
SOK2	-0.0297359	0.0092102		yes
SPB1	-0.287865	0.118391		yes
SPO20	-0.217324	0.0607387		yes
SRL1	-0.0197509	0.00323123		yes
SUR1	0.251209	0.0833241		yes
SVS1	0.420681	0.262538		yes
TOK1	0.44134	0.222951		yes
TOS2	0.157974	0.036803		yes
TOS3	0.277769	0.122295		yes
TOS6	0.16508	0.0332288		yes
TOS8	0.601122	0.207408		yes
TYE7	0.210934	0.041965		yes
UTH1	-0.21332	0.0507628		yes
UTR2	0.90462	1.4438		yes
YAT1	0.568791	0.158388		yes
YBL029W	-0.261196	0.1559		yes
YBR071W	0.38595	0.138568		yes
YDL183C	0.121951	0.0330965		yes
YGR153W	-0.809652	1.4438		yes
YHP1	0.46681	0.118356		yes
YKR011C	-0.137486	0.0384071		yes
YOL019W	0.646896	0.397137		yes
YOR342C	0.325157	0.0607387		yes
YOX1	0.0316738	0.0092102		yes
YPS3	0.572342	0.390668		yes
YSY6	-0.30074	0.106358		yes
ZEO1	0.0846646	0.0127669		yes
YCL068C	8.9593	0.272096
TRP1	3.29882	27.5266
DAL4	2.24178	0.239281
HIS4	1.56702	0.174363
DAL80	1.5185	0.109395
DAL5	1.51057	0.121457
DUR1,2	1.38555	0.126368
SUL2	1.38225	0.366459
MET17	1.35665	0.365748
DIP5	1.35449	1.61724
MEP2	1.27028	0.0980547
YGR035C	1.25724	1.15189
ATG41	1.23178	0.357275
ADH5	1.22363	0.430974
DAL7	1.20511	0.440493
PAU17	1.19904	0.438064
YHR210C	1.19489	0.357878
YGL117W	1.18976	0.370694
NSR1	1.18628	0.782758
GRE2	1.17785	0.765752
YRO2	1.17171	0.355472
TDH3	1.15886	0.41933
SAM2	1.15302	1.9523
RPS12	1.1419	1.15291
ASN1	1.14171	0.649483
GAP1	1.12807	0.335558
BOL3	1.12669	1.16309
TDH1	1.10181	1.08432
TPI1	1.09721	0.866813
ARG1	1.09689	0.888697
DUR3	1.08233	0.756577
YHR213W	1.0803	0.279859
COA2	1.06878	0.876361
SUL1	1.05813	0.438064
VBA1	1.05744	0.482899
SAM3	1.04595	0.397137
CPS1	1.04365	0.610195
LEU4	1.03745	0.338037
KNH1	1.0372	0.811517
RPL30	1.03139	1.02086
MET6	1.03019	0.397137
MET5	1.02875	0.272012
GPM1	1.02678	0.459939
RGI1	1.01802	0.24157
YEL068C	1.01238	0.540848
LYS1	1.00969	0.357977
PDC1	1.00059	0.283356
SCW10	0.998625	1.8257
SDH2	0.995246	0.327044
SAM1	0.994578	1.4438
YIL059C	0.991294	0.203707
ADE17	0.991201	0.438064
YGL258W-A	0.990215	0.0606031
FLC1	0.988672	0.63585
PGI1	0.986598	0.357878
MRPL44	0.983374	0.526747
PDC5	0.980664	1.50766
RPL9A	0.976261	0.800175
HOM3	0.969793	0.280049
IDP1	0.952377	0.357878
PAU7	0.949113	0.368043
DAL1	0.947706	0.0620481
TIM9	0.94724	0.357878
SHM2	0.943396	0.514886
HIS3	0.940618	0.438064
RPS22A	0.935509	0.404496
YGP1	0.930823	0.269907
CPA2	0.930171	0.258539
ASC1	0.929835	0.474656
ENO1	0.928528	0.357275
GLY1	0.926505	0.776894
FBA1	0.925988	0.447285
SPR2	0.923957	0.118391
PDR5	0.919358	1.8257
STR3	0.916644	0.708781
PGK1	0.916566	0.406569
RPS16B	0.915158	0.440493
YGL039W	0.914128	0.874391
ENO2	0.912419	0.33662
RPL21B	0.911001	0.433141
TOS1	0.910782	1.44874
SEO1	0.905921	0.276303
ARE1	0.901898	1.4438
RPL1B	0.901163	0.539066
TKL1	0.894114	0.438064
RPS18A	0.894103	0.708617
HOM2	0.89363	0.438064
ARG3	0.892959	0.357878
GLN1	0.891337	0.978097
ARG8	0.886783	0.399573
RPL17B	0.885252	0.481913
DLD3	0.883133	0.196759
BSC5	0.882826	0.438064
ARO4	0.881185	0.357878
ILV2	0.877513	0.543046
RRT5	0.870355	0.0376436
RPL2B	0.867599	0.40388
YPL264C	0.866678	0.264387
CYC1	0.86519	0.357878
ARO1	0.864844	0.237796
ACO2	0.863214	0.264387
NIT1	0.861573	0.288574
ARG4	0.858202	0.357878
GPP1	0.857284	0.782758
SRD1	0.853068	0.125019
ARG7	0.849319	0.262538
TDH2	0.848761	0.284947
PAU2	0.848685	0.680497
ADE12	0.846871	0.547913
MPC2	0.842829	0.447285
MAN2	0.838577	0.207408
RPS2	0.832833	0.438064
URA10	0.832419	0.357878
CMC4	0.831847	0.207814
RPS9A	0.831671	0.195301
RPL20A	0.827594	0.492059
RPS24B	0.822831	0.438064
NRG2	0.820016	0.300605
TAT1	0.819925	0.226891
DDR48	0.819342	0.480542
AHP1	0.818449	0.514886
RPP1B	0.814804	0.41933
MRPL33	0.81273	0.628339
RPL1A	0.809523	0.685893
GNP1	0.809462	0.158926
RPL27B	0.808959	0.264387
ARI1	0.808354	0.335558
QCR10	0.806962	1.16309
HXK2	0.806721	0.357878
ORT1	0.802984	0.41933
URA2	0.796089	0.350736
BOP2	0.794929	0.175475
ERG9	0.794566	0.599454
RSB1	0.793347	0.652593
ADH1	0.793142	0.355472
ADE3	0.791146	0.357977
ILV3	0.790069	0.357878
MUP1	0.784009	0.500629
DAL3	0.782531	0.196195
GPG1	0.781941	0.542057
SHU1	0.780571	0.357878
EMC6	0.778897	0.643349
BIO5	0.778382	0.252219
RPS4B	0.774434	0.279859
RPS7A	0.774037	0.161999
SCP1	0.766124	0.543046
MET3	0.765575	0.264387
TRX3	0.764925	0.628339
FCY2	0.764061	0.873656
FMP33	0.763471	0.294713
COQ2	0.763326	0.526747
SSB2	0.761782	0.736539
CIS1	0.761119	0.338037
RPS3	0.760393	0.236595
ICS2	0.759696	0.253334
RPS24A	0.757062	0.244248
PRY2	0.755057	0.222951
RPL8B	0.754839	0.606414
RPS29B	0.7541	0.386879
QCR9	0.754008	0.800175
THR1	0.751622	0.294713
MIR1	0.750759	1.02086
YIL166C	0.750062	0.38531
ACS2	0.749789	0.853621
WTM1	0.748854	0.526747
RPL9B	0.748479	0.357878
ILS1	0.747977	0.294922
ATR1	0.74479	0.294713
GGC1	0.742578	0.357878
CDC19	0.742117	0.241565
PUT1	0.742023	0.329389
PAU6	0.741821	0.226891
THI73	0.741724	0.239281
ATO2	0.741534	0.203993
CHA1	0.740706	0.613152
TSA1	0.740201	1.1979
COX6	0.738411	0.386879
YPR170W-B	0.738254	0.756577
PMA1	0.733278	0.280544
AXL2	0.732473	0.543046
LDS1	0.73058	0.0354875
OPI3	0.729771	0.264387
HMG1	0.729725	0.294713
IRC7	0.727792	0.440493
FSH1	0.726648	0.41933
FMP23	0.726105	0.776894
RGI2	0.725397	0.207408
RPP1A	0.724251	0.353116
ARG5,6	0.721638	0.239281
YNR061C	0.719983	0.575864
RPL21A	0.719516	0.255949
YHB1	0.719146	0.264387
FRE7	0.714362	0.291399
VHT1	0.712085	0.16056
YNL190W	0.712006	0.239281
YOL014W	0.711043	0.264387
YHR140W	0.710517	1.07894
PLB1	0.707535	0.482899
YJR115W	0.706216	0.241604
YAH1	0.705424	0.542057
PPM1	0.705298	0.966706
PIS1	0.698388	0.438064
RPB10	0.696956	0.214783
ICT1	0.695796	0.270444
ERG28	0.695079	0.400716
BIO2	0.694011	0.17687
TRP4	0.693505	0.355472
RPS1A	0.693193	0.319615
TAL1	0.692409	0.355472
ERG5	0.690656	0.681977
GAL7	0.686682	0.13194
SDH1	0.684097	0.240029
COX13	0.68201	0.33662
FET3	0.681427	0.438064
ERG3	0.680121	0.447285
TMA19	0.674633	0.264387
ALD5	0.673884	0.438064
RPS5	0.671688	0.270444
LYS21	0.669111	0.366055
VPH2	0.666299	0.207408
PSA1	0.665557	0.643349
RPS26B	0.665467	0.241565
PFK2	0.665105	0.296521
CUP1-2	0.664944	0.185074
COX18	0.663552	0.347502
ALD6	0.661259	0.158926
SCS7	0.660587	0.24157
MEP3	0.658565	0.314094
CHO1	0.658158	0.776894
MET10	0.65768	0.178332
NAR1	0.654644	0.516127
SSU1	0.654457	0.17048
ZRT1	0.653511	0.241565
ENA1	0.653198	0.708198
TRP3	0.651312	0.369723
INO1	0.650592	1.08432
SER1	0.649932	0.262538
SUN4	0.649732	0.175475
RPS8B	0.64887	0.189866
RTK1	0.648689	0.222951
VHR1	0.648675	0.370694
RPL36A	0.64814	0.244601
FAS2	0.647296	0.543046
RPL27A	0.647061	0.158433
THI7	0.646353	0.699951
AIM6	0.645497	0.386879
PUT4	0.644865	0.542057
YPR078C	0.644364	0.143243
RPL10	0.644083	0.160748
FMP45	0.643664	0.156092
POM33	0.643574	0.357878
MRPL39	0.64332	0.264387
PPM2	0.64253	0.16792
GND1	0.642487	0.357977
FMP48	0.64073	0.199961
ICY1	0.640319	0.120812
ERG20	0.640263	0.479479
STM1	0.638262	0.376445
MIG1	0.637531	0.526747
QCR8	0.637109	0.680497
RPL18A	0.636458	0.19009
UGA3	0.635814	0.294713
YLL056C	0.635813	0.628339
COX7	0.635565	0.649483
ASN2	0.634682	0.411115
SSC1	0.633483	0.776894
EFT2	0.632922	0.479479
YDR541C	0.632862	0.239281
YNL134C	0.630589	0.438064
VBA2	0.630509	0.33662
ARO3	0.63022	0.180272
RPP0	0.630157	0.264387
TRP5	0.629786	0.296973
MRX14	0.629253	0.443416
YLR460C	0.627656	0.264387
SOD1	0.627139	0.543046
SAH1	0.626985	0.613152
PSF1	0.624312	0.468866
EHT1	0.623957	0.386879
YNR040W	0.622399	0.207408
HSP104	0.620923	0.960428
YDL124W	0.617492	0.438064
SSB1	0.616629	0.438064
YHR180W	0.615757	0.284947
GDH1	0.615432	0.113775
MNN1	0.615402	0.508671
RPL36B	0.615381	0.207408
FRM2	0.615316	0.314094
RPL3	0.61416	0.357878
EFT1	0.61238	0.465925
PMU1	0.612042	0.386879
SPO19	0.611011	0.0620985
BIO3	0.60675	0.284947
AAP1	0.606113	0.199039
MET2	0.604183	0.213186
EGT2	0.60146	0.0301338
PAU13	0.60084	0.121457
RPP2A	0.599798	0.218359
PIR3	0.59968	0.765752
SSP1	0.599322	0.095991
YMR31	0.598724	0.357878
ACT1	0.598271	0.891233
YIL002W-A	0.597674	0.280544
MCR1	0.595564	0.314094
TOH1	0.595075	0.713181
TPO2	0.594366	0.481844
RNR2	0.594341	0.628339
MID1	0.591733	0.316227
FUN26	0.591248	0.24527
DSF1	0.589862	0.144247
VCX1	0.589588	0.222951
GLG1	0.58935	0.196195
ILV1	0.588912	0.235472
HSP78	0.588713	0.54803
UGA1	0.588292	0.357618
YOP1	0.585774	0.71688
ATO3	0.585316	0.16056
ATP15	0.584573	0.526747
GRX4	0.584097	0.21546
UIP3	0.580954	0.443416
HOM6	0.580942	0.432977
LAP3	0.579453	0.526747
CPR1	0.578727	0.513506
HPT1	0.578483	0.438064
SAD1	0.578349	0.214783
AMD2	0.577651	0.467645
BDH1	0.577451	0.281186
YLR125W	0.577322	0.132796
ARO8	0.576895	0.21546
MIC12	0.57571	0.357275
HSH49	0.575133	0.241565
CHO2	0.574891	0.335558
SMK1	0.574605	0.269907
LYS2	0.573762	0.269907
IPI1	0.573428	0.262538
RIP1	0.57262	0.264387
YHR212W-A	0.570436	0.0756477
GDH3	0.569899	0.241565
HXT5	0.569348	0.365748
MAE1	0.568998	0.438064
GFD2	0.565537	0.156092
HTD2	0.564353	0.222951
ERI1	0.563838	0.162007
THI72	0.563109	0.304621
PYC2	0.561808	0.257301
ODC2	0.561338	0.191777
HEM13	0.561071	0.699951
MRI1	0.56041	0.357878
THI22	0.560328	0.280713
RPS23B	0.560227	0.123778
GUT2	0.560053	0.207408
TPS2	0.560047	0.347502
OYE2	0.55771	0.685893
FRE2	0.55467	0.17048
SPI1	0.553773	0.160748
SPS100	0.553694	0.397619
RPL16A	0.550968	0.175475
ATP1	0.550938	0.386879
ADO1	0.550912	0.357977
TOM7	0.549372	0.280406
BIO4	0.548823	0.294713
GLT1	0.547954	0.176402
RPS8A	0.547948	0.135903
THI21	0.547298	0.438064
RPP2B	0.546905	0.145658
TEF1	0.546604	0.481844
SUC2	0.546332	0.139292
TPA1	0.546198	0.357977
SRY1	0.545282	0.357878
YHK8	0.544941	0.294713
SKP2	0.54434	0.161999
SDH3	0.543276	0.173496
PIR5	0.543005	0.335558
RPL17A	0.542988	0.283356
HNM1	0.542612	0.680497
PRP11	0.542139	0.191777
CAN1	0.541885	0.16056
EMP47	0.540349	0.276303
RPS0B	0.540093	0.438064
SUT2	0.540019	0.443416
HEM1	0.539509	0.198672
MRPL8	0.53928	0.196895
MEO1	0.53878	0.160748
LEU1	0.538166	0.262538
YLR152C	0.537992	0.156092
TEF2	0.537786	0.438064
TFS1	0.537713	0.376445
ATP18	0.537571	0.314094
YFL012W	0.537246	0.041965
MET14	0.537232	0.175475
SNO1	0.536897	0.207408
CAB2	0.535789	0.160748
RPL22A	0.535745	0.0896454
YPL067C	0.535294	0.262538
ERG12	0.534798	0.355472
ORM2	0.534676	0.465925
AIR2	0.533962	0.40387
PGA1	0.533705	0.196895
ANB1	0.533419	0.0455793
SAP4	0.532513	0.182722
RPS13	0.532374	0.156092
TVP18	0.531487	0.443364
TDA6	0.530771	0.143651
YER076C	0.530461	0.264387
BNA3	0.529851	0.304121
QCR2	0.529779	0.175475
ILV5	0.52939	0.355472
TAE1	0.529171	0.262538
SER33	0.528298	0.351949
SSA2	0.527901	0.284947
YLR050C	0.527636	0.438064
SPS2	0.527512	0.0607387
ECM3	0.527205	0.371744
ICP55	0.526455	0.239281
ERG26	0.525353	0.438064
SDH6	0.524676	0.357878
YAT2	0.523973	0.0763349
SNQ2	0.523843	0.365748
ILV6	0.52294	0.170103
RPS0A	0.522797	0.199039
DED81	0.522478	0.195301
YMR295C	0.52201	0.300605
RPA43	0.521936	0.255949
FAS1	0.521749	0.370694
SMP1	0.521003	0.241565
MRPS8	0.520157	0.207408
RNR4	0.519736	0.438064
ARA1	0.519207	0.276303
CSR2	0.518097	0.249451
RPS28B	0.517734	0.245056
YGR122W	0.517504	0.400455
SAS5	0.517185	0.196272
ADK1	0.516646	0.386879
PET10	0.516602	0.239281
TPO3	0.515991	0.357275
PFS1	0.515728	0.0277485
MTQ1	0.514974	0.22927
YCT1	0.51432	0.201436
YEF3	0.513488	0.370694
PHO88	0.513246	0.218953
IPK1	0.510597	0.207408
RPL5	0.510345	0.209246
LDS2	0.51022	0.0622512
PIR1	0.50914	0.0325943
SOD2	0.508394	0.335558
MNT4	0.505801	0.285001
TSL1	0.50566	0.199039
YJL133C-A	0.504692	0.182523
SPS4	0.504334	0.0190024
YNR021W	0.503811	0.335558
DBP2	0.502893	0.0620481
COQ10	0.502229	0.276303
POL30	0.501327	0.438064
RPS4A	0.501093	0.116563
PDC6	0.500834	0.239281
GPD2	0.500781	0.171145
XPT1	0.500529	0.410163
IML2	0.499972	0.422252
PMA2	0.497769	0.207408
TNA1	0.496948	0.366055
HIS5	0.496469	0.155332
BUD17	0.496378	0.357878
RPL8A	0.496344	0.158926
MET22	0.495788	0.335558
GPX1	0.495657	0.279859
NDI1	0.49541	0.190653
PBI2	0.49516	0.465925
IMA5	0.494802	0.241565
AIM18	0.493873	0.386879
MRH1	0.493414	0.1256
CDS1	0.492242	0.222951
CTT1	0.491491	0.0827828
SOL3	0.491091	0.251738
VRG4	0.490301	0.347502
TRM112	0.490151	0.276303
PAU5	0.489994	0.176402
GCN4	0.489839	0.357977
YPL162C	0.489607	0.204266
RRP42	0.488368	0.328398
RPS1B	0.488102	0.158057
TRS31	0.487531	0.357618
TCA17	0.486966	0.138568
ERV1	0.486747	0.199039
GUA1	0.486507	0.241565
AAH1	0.48591	0.226891
OPT1	0.485731	0.169149
APT1	0.485442	0.304774
AIM24	0.485289	0.357878
POA1	0.484948	0.24987
URA6	0.484533	0.199039
RPL15A	0.484418	0.143226
CYT1	0.484222	0.129528
YER156C	0.482887	0.264387
PHO4	0.480772	0.299912
IZH3	0.480615	0.338037
ARN1	0.480552	0.376445
PDX3	0.47994	0.304774
ATP3	0.479315	0.262538
YFH1	0.479218	0.126204
NSG2	0.478613	0.283356
MRS1	0.47849	0.207408
ERG27	0.477746	0.463175
DPS1	0.476314	0.167586
SPR6	0.474877	0.280049
STD1	0.474825	0.160748
PCL5	0.474635	0.114873
BGL2	0.47416	0.474656
TVP23	0.473985	0.269907
MTO1	0.472575	0.166266
PEX11	0.472565	0.438064
ALT1	0.471589	0.21546
MRPL7	0.471499	0.357618
LYS12	0.471208	0.16056
UTR4	0.469765	0.357275
GAS2	0.46932	0.0620985
TRP2	0.469051	0.160748
TDA2	0.469035	0.186475
STE3	0.467806	0.217513
COF1	0.467168	0.300605
RIM9	0.466473	0.158227
CYS3	0.464217	0.190653
VID24	0.463834	0.201305
ACP1	0.463829	0.355472
STE2	0.463469	0.241565
YLR179C	0.463428	0.264387
DSE4	0.462268	0.0579127
CRD1	0.46163	0.209246
BAP3	0.461482	0.117727
RPL26B	0.461089	0.0999591
BAT2	0.460859	0.355472
RPL11B	0.46068	0.12417
SCM4	0.460228	0.102232
QDR3	0.460084	0.233714
SHH4	0.460011	0.195301
LYS4	0.459675	0.0912023
BDH2	0.459674	0.338037
PTH1	0.459492	0.234084
COX8	0.458628	0.241565
RPL24A	0.458219	0.0854545
FAA3	0.457666	0.276303
HMS1	0.45711	0.203707
YNL122C	0.455886	0.16056
SSA1	0.454764	0.239281
YFL041W-A	0.454427	0.0757491
PMR1	0.454178	0.272096
YPR196W	0.453896	0.294713
RPL32	0.453371	0.119155
DFG10	0.453253	0.0704697
ATP7	0.452944	0.357977
COA1	0.452898	0.288574
MRP10	0.451868	0.161999
CPR3	0.451441	0.207408
GOR1	0.450975	0.357878
YHR020W	0.450386	0.171145
BOL1	0.450382	0.176402
PPT2	0.450104	0.153085
YIH1	0.449523	0.291399
CYB2	0.449122	0.126368
NRK1	0.448829	0.156092
ADE13	0.448016	0.338037
RAS2	0.447696	0.264387
ACC1	0.44751	0.294713
SPC1	0.447001	0.223637
GPC1	0.446899	0.207408
YCF1	0.446565	0.167586
MNP1	0.446362	0.293133
FLR1	0.446314	0.222951
RPS7B	0.446066	0.125831
YNL208W	0.445751	0.368043
TIM8	0.444932	0.0795263
RPA12	0.444841	0.102232
DPP1	0.444411	0.335558
MCP1	0.444346	0.241036
VMA13	0.443912	0.438064
COX14	0.443349	0.238158
IMG1	0.442243	0.222951
YNL010W	0.441947	0.214783
FMN1	0.44101	0.239312
YDR476C	0.440639	0.376445
KTI12	0.440333	0.241565
UPS1	0.440185	0.207408
YMR099C	0.439982	0.252219
ADE4	0.43979	0.207814
COX26	0.439005	0.116215
TOM20	0.438878	0.264387
KRS1	0.438835	0.252219
KGD1	0.438818	0.102369
SDH8	0.438683	0.203707
CTR1	0.438395	0.123594
YJL213W	0.438372	0.185848
DAD1	0.438037	0.165786
KRE2	0.437576	0.222951
GAD1	0.436548	0.156092
ZPS1	0.436092	0.283356
RPS31	0.436048	0.0614758
RPL12A	0.43467	0.104098
GRX2	0.431886	0.280544
YAR023C	0.431589	0.183618
AVT4	0.431435	0.233065
AIM17	0.43094	0.16056
CYB5	0.430927	0.138568
SST2	0.430865	0.195301
ARF2	0.429502	0.281624
ATX1	0.429281	0.248615
ECM19	0.429123	0.126128
ADE6	0.429106	0.182722
CTS1	0.428203	0.0620985
MUP3	0.427848	0.205792
FLO5	0.427504	0.144244
ERG1	0.427202	0.176589
COX4	0.427177	0.262538
AQY1	0.426869	0.207408
RPS9B	0.426834	0.0926441
TMN3	0.426372	0.258539
RPL12B	0.426305	0.139292
RPL11A	0.426081	0.121457
DPH2	0.425547	0.171145
RPL2A	0.425505	0.108696
ADH4	0.425501	0.241565
RSN1	0.42431	0.214783
PFK1	0.424114	0.160006
ARO2	0.422957	0.171145
GCY1	0.422801	0.155332
YPQ2	0.421993	0.294713
YHR078W	0.421832	0.160748
ADE1	0.42162	0.338037
YKR070W	0.421292	0.233065
PDB1	0.421052	0.248928
ADE5,7	0.420676	0.35778
PUN1	0.420639	0.198672
GTO3	0.420335	0.122295
OPI1	0.42032	0.211123
KAP122	0.420305	0.160748
CMD1	0.420061	0.300605
SCS3	0.419955	0.33662
TAT2	0.419808	0.122295
SEC53	0.419768	0.177672
PXP2	0.419642	0.17048
TOM6	0.419082	0.0671927
PFA3	0.418884	0.262538
ROG3	0.418336	0.205792
YPC1	0.418124	0.189161
PRX1	0.418046	0.280544
GPH1	0.41719	0.160748
OYE3	0.417186	0.185544
KIN82	0.416801	0.122295
AVT5	0.4167	0.25786
BUD7	0.415942	0.158926
CIA2	0.415005	0.25786
IDH2	0.414416	0.294713
CHS7	0.414269	0.209619
TPO1	0.41312	0.27153
MAS2	0.413029	0.262538
RNR3	0.411663	0.139597
COQ9	0.411323	0.207408
RPS20	0.410885	0.0836228
NTF2	0.4106	0.138415
TTI2	0.410029	0.190653
GRE3	0.409139	0.175475
RSM10	0.408675	0.16056
HIS1	0.408561	0.131985
SVP26	0.408397	0.175475
AMD1	0.408302	0.191777
BSC6	0.407979	0.165786
VBA5	0.40752	0.213186
APQ12	0.407283	0.209246
SUS1	0.407002	0.16056
COM2	0.406718	0.238319
NCE102	0.406613	0.171145
RPS16A	0.406319	0.0980906
ADE8	0.406143	0.258539
AVT6	0.405942	0.241565
MRX9	0.404942	0.119155
AIM46	0.404863	0.294497
PRO1	0.404562	0.161999
YER158C	0.404299	0.173898
ISF1	0.404248	0.129528
IST2	0.403688	0.146392
YNR062C	0.403633	0.119155
DAL82	0.403587	0.250084
TIF6	0.403245	0.327044
YDL218W	0.403211	0.116671
DAL2	0.402712	0.0551327
YHL018W	0.402436	0.156092
SRL4	0.402243	0.121457
HAM1	0.40214	0.16056
YIP1	0.401996	0.244248
YPL191C	0.400604	0.207814
AFG1	0.400368	0.175475
PRP39	0.40022	0.224329
YKL133C	0.400168	0.224329
APL1	0.399824	0.161249
ACH1	0.399343	0.0907498
FRD1	0.398146	0.239281
CWH43	0.398135	0.165786
LRE1	0.397424	0.244393
GUT1	0.396959	0.141458
CAF20	0.396829	0.239298
TPS3	0.396813	0.311227
DLS1	0.396812	0.122295
HAC1	0.39657	0.200295
AIM33	0.39648	0.207408
PTK1	0.395616	0.107156
MAL31	0.395292	0.223637
CYS4	0.39527	0.264387
EXG1	0.394928	0.108178
APM1	0.394599	0.135903
VPH1	0.394342	0.262538
ERP6	0.394272	0.241565
SOL1	0.393589	0.156092
STE13	0.393239	0.160748
YPR127W	0.39315	0.239312
RPL29	0.39303	0.169983
AYR1	0.392966	0.214783
ELO3	0.391969	0.241565
TIM13	0.391964	0.196895
MST1	0.391754	0.225139
SPF1	0.391702	0.338037
VAS1	0.391027	0.203325
MXR2	0.390727	0.239281
DSE1	0.389927	0.0552285
MSS18	0.389566	0.24157
NIT3	0.389529	0.294713
CCP1	0.388986	0.0722633
CTR86	0.388928	0.222951
SCS22	0.388602	0.16056
RBD2	0.388014	0.211123
SPG1	0.387686	0.0607387
RPL6A	0.3876	0.0678395
PDR8	0.387141	0.139292
DED1	0.386498	0.262538
SEC21	0.386318	0.284947
ENV7	0.386315	0.223637
CTM1	0.385989	0.190643
ACO1	0.384506	0.160006
RCR1	0.384164	0.262538
CSG2	0.383726	0.28905
RTC6	0.383595	0.113064
IMD4	0.382978	0.0807859
DIA3	0.382929	0.0980906
MET30	0.382468	0.122111
TSC13	0.382421	0.264387
DAN1	0.382326	0.160748
RPS26A	0.382128	0.113775
HSP10	0.381844	0.244248
YDL085C-A	0.381728	0.188648
HST4	0.381394	0.158388
FMP42	0.381324	0.222951
SDH4	0.380238	0.0833241
YMD8	0.38022	0.190653
HTA2	0.379386	0.0614758
YDR249C	0.379197	0.0926441
ARG2	0.379141	0.199385
AGX1	0.377761	0.113623
DLT1	0.3777	0.158926
STR2	0.377524	0.157892
FRE4	0.377386	0.16056
DLD1	0.37716	0.16056
RPS21A	0.377013	0.100926
MIX17	0.376416	0.211712
IMP2	0.376364	0.125376
YMC2	0.376251	0.156092
HPM1	0.376012	0.209246
IRC15	0.375623	0.143243
MHO1	0.375399	0.162007
TMA10	0.375146	0.123594
TOA2	0.374918	0.122295
RTN1	0.374018	0.166619
DIA1	0.37309	0.107334
INN1	0.373052	0.101817
UGA4	0.37303	0.0579127
PNC1	0.372192	0.24987
DRN1	0.372117	0.22341
YIF1	0.371867	0.196272
MHT1	0.371402	0.094861
RCK1	0.371192	0.0990889
BNA4	0.3709	0.280713
RPL42A	0.370329	0.0200705
TEN1	0.369633	0.0757491
MRS2	0.36948	0.113775
YMC1	0.369308	0.157892
LOS1	0.368843	0.156092
YIR042C	0.368545	0.0631804
PGU1	0.368377	0.104445
SIT1	0.36832	0.134458
NUP100	0.367863	0.0704697
MED8	0.367683	0.122295
NCB2	0.367591	0.175475
DOT5	0.367269	0.207408
FUI1	0.366462	0.126204
SDH7	0.366379	0.160748
SEG1	0.366053	0.143702
PNS1	0.365921	0.239281
MTH1	0.365304	0.076053
GSP1	0.365165	0.175475
MIX14	0.365018	0.114873
TEA1	0.365017	0.144244
FLO10	0.364513	0.0837126
MSN1	0.364469	0.155526
ORC3	0.3643	0.127949
SSZ1	0.364218	0.264387
PHO3	0.363166	0.0661925
HOC1	0.362929	0.160748
DDR2	0.362856	0.0622512
RSM18	0.361606	0.16056
GCR1	0.361541	0.11536
KHR1	0.361265	0.174363
YKL071W	0.361237	0.207408
MED6	0.361207	0.152138
VMA8	0.361192	0.17687
APA2	0.360959	0.238319
IML3	0.359474	0.161623
DAK2	0.358927	0.127337
BPT1	0.358918	0.113623
HUB1	0.358352	0.0978779
GSY2	0.35831	0.0755595
URA5	0.358284	0.185848
SYM1	0.358251	0.205845
RSM25	0.358135	0.13771
CIN10	0.357697	0.205792
RRF1	0.357393	0.13771
HEM15	0.357123	0.16056
APE1	0.356927	0.239281
MTD1	0.356427	0.195301
RDL2	0.356061	0.155716
CAR1	0.354468	0.119155
PEX2	0.353657	0.144244
YLL058W	0.353456	0.205845
AIM19	0.353215	0.17367
RRT12	0.352264	0.113623
MET1	0.352157	0.0661925
COA3	0.351844	0.106817
PTR2	0.351669	0.122295
MMF1	0.351438	0.182722
RAM2	0.351105	0.193583
RPS10A	0.351059	0.0795263
MRPL1	0.350775	0.161623
YPL247C	0.35072	0.208617
SGA1	0.350449	0.126368
SFB2	0.350305	0.122295
YFH7	0.350083	0.120899
PIP2	0.350075	0.121457
PEX4	0.349846	0.181875
HTL1	0.349793	0.0952574
VMA7	0.348025	0.214783
CPT1	0.34798	0.209246
HTS1	0.347626	0.160627
THP1	0.347292	0.174363
SHM1	0.346685	0.160748
RRP43	0.346574	0.190643
GLO1	0.346405	0.110181
ZRC1	0.345809	0.251738
YBT1	0.345671	0.114873
ATP5	0.34556	0.175475
MES1	0.34551	0.181161
GDH2	0.345469	0.114873
ITR1	0.344808	0.185848
RSC9	0.344564	0.196272
IMD3	0.344428	0.116563
RKR1	0.344426	0.112904
CCC1	0.343821	0.158926
ENB1	0.343689	0.211123
CMK1	0.343379	0.161623
SNA2	0.342661	0.211787
LAS21	0.342577	0.157892
PHO5	0.34251	0.0429495
YCL002C	0.342241	0.205749
RPL43B	0.342181	0.0614043
PRM15	0.341697	0.239281
DSE2	0.341251	0.0178174
YPR1	0.34072	0.19009
CAF16	0.340635	0.113308
YER034W	0.340485	0.106358
GLC3	0.340391	0.239281
RPA135	0.339696	0.211123
YCL049C	0.338815	0.0900088
ERG25	0.338624	0.156092
THR4	0.3386	0.14903
GOT1	0.338489	0.107585
PRO2	0.33841	0.201436
PRY3	0.338197	0.0668787
TIF11	0.338195	0.194043
RPS15	0.338142	0.0907498
COX12	0.338102	0.199039
PER1	0.338038	0.122295
PEX32	0.338011	0.158433
OSW7	0.337933	0.122295
PIC2	0.336415	0.160748
UBA1	0.336012	0.209246
SNC2	0.335677	0.0807859
GCV2	0.335611	0.241565
AIM11	0.33504	0.0972564
PRC1	0.334995	0.241565
EFM2	0.333973	0.0907498
MLC1	0.333937	0.196272
ARO80	0.333317	0.196272
RKI1	0.333213	0.132439
YIL102C-A	0.333091	0.0607387
MDM36	0.333046	0.144884
PET122	0.33228	0.156092
PDR12	0.332166	0.216771
COS9	0.33193	0.160748
DML1	0.331808	0.0958842
PAU23	0.331314	0.0839755
SYG1	0.329539	0.183618
YPQ1	0.329446	0.0926441
YGR161W-C	0.32907	0.121457
TIM22	0.328813	0.158227
THI4	0.328632	0.0795263
APC11	0.328453	0.0620985
PPS1	0.328397	0.158227
PPH21	0.328019	0.222951
BPL1	0.327622	0.120877
PAM17	0.327089	0.192399
LST8	0.326845	0.156092
RPA14	0.326791	0.143651
SYS1	0.326708	0.146392
ERG10	0.32667	0.16056
MDM32	0.326631	0.0907498
MRPL11	0.326349	0.125964
NOP1	0.325636	0.203993
YPF1	0.32532	0.119155
YGR079W	0.325145	0.0756477
GEP5	0.325059	0.122295
CSN9	0.324941	0.0763349
RPL13A	0.324756	0.0720977
YDR524C-B	0.324751	0.112913
NVJ1	0.324421	0.113775
OLA1	0.324289	0.141256
NMA1	0.323443	0.143651
NDE1	0.323348	0.222951
ALA1	0.323131	0.23159
SCW11	0.322934	0.0439802
YIP3	0.322771	0.185848
RPL19A	0.322213	0.0614043
MET13	0.321912	0.102785
UBX6	0.321847	0.0756477
HCH1	0.321435	0.10881
YMR1	0.321131	0.16056
MRP1	0.32106	0.160748
CBR1	0.320584	0.171145
MMT2	0.320486	0.19882
UGA2	0.320173	0.196104
THG1	0.320158	0.123594
ATP17	0.320153	0.160748
AIF1	0.319876	0.062474
MSK1	0.319638	0.160748
DIN7	0.319385	0.175475
SSH4	0.319071	0.0906802
THI20	0.31869	0.161623
GAL80	0.31869	0.158433
CDC20	0.318575	0.0797903
DBP6	0.318356	0.122111
STL1	0.318232	0.102232
PSE1	0.317846	0.146479
ATM1	0.317764	0.0701591
SLM1	0.317602	0.107452
MOG1	0.317601	0.166266
THI6	0.317276	0.19009
YHR173C	0.317075	0.0980547
DCS2	0.317027	0.14445
GUD1	0.31675	0.166619
NSG1	0.316434	0.156092
NYV1	0.316363	0.16056
PAB1	0.316286	0.207408
MRPL38	0.316233	0.16418
FUR4	0.315325	0.146038
SFT2	0.315072	0.203707
DSD1	0.31505	0.196195
YBR284W	0.314954	0.174911
SYN8	0.314814	0.175475
UTP5	0.314541	0.132439
YDR090C	0.314376	0.0827828
RPS27A	0.313746	0.05589
KTR6	0.31371	0.113623
ERT1	0.313105	0.114873
GLR1	0.31301	0.149502
KRE1	0.312879	0.161623
ATX2	0.312763	0.153085
YCL012C	0.312738	0.11977
HMO1	0.312436	0.121457
RPL39	0.312411	0.0583987
STE6	0.312355	0.0845253
SMF2	0.311783	0.113775
DCS1	0.311473	0.190841
MOH1	0.311213	0.113775
RTT109	0.311165	0.161999
AMN1	0.31017	0.0460428
PWP2	0.309492	0.130547
STN1	0.30942	0.124425
FRE1	0.309041	0.189161
RTS3	0.308552	0.109038
PFA5	0.308371	0.144244
PEX15	0.308239	0.14233
HRI1	0.308148	0.0904548
MRPS5	0.308059	0.158433
MRS4	0.307551	0.0607387
LAT1	0.307169	0.192399
LYS9	0.30714	0.161249
SNF6	0.307092	0.191777
DSS1	0.306524	0.148729
HAP1	0.306523	0.175475
SMP3	0.306034	0.145095
RPB8	0.306029	0.117176
YJL206C	0.306005	0.0752894
PCM1	0.305493	0.13771
ISC1	0.305302	0.196272
LDB17	0.304444	0.139658
YBR220C	0.304419	0.16056
BRR1	0.304054	0.156092
COQ1	0.303768	0.156092
SER2	0.303195	0.143702
SSN8	0.302687	0.121457
URA7	0.302439	0.0980906
NPR1	0.302356	0.173496
MSI1	0.302231	0.0761002
NCR1	0.302057	0.127949
RDR1	0.301958	0.112904
MET8	0.301441	0.0647823
VBA4	0.301132	0.108696
LSB6	0.300356	0.127949
YJL193W	0.300048	0.0972564
UBC11	0.299948	0.0733072
PRR2	0.299929	0.0607387
SMF3	0.299768	0.114873
GLK1	0.29898	0.185848
YJR154W	0.298924	0.0668787
CHC1	0.298834	0.156098
YPR010C-A	0.298792	0.0688509
BNA6	0.298668	0.144244
YKR075C	0.298256	0.0631804
MRP17	0.298219	0.0552285
CYC3	0.297954	0.166619
CDD1	0.297262	0.0571287
HXT2	0.297197	0.0464979
SAC1	0.296277	0.195301
QDR1	0.296149	0.144801
YNL320W	0.295951	0.0980547
EPT1	0.295374	0.125376
GPI8	0.295184	0.153085
YNR064C	0.294974	0.156092
RPL14B	0.294508	0.041965
RPS28A	0.29442	0.0853561
RPL14A	0.294259	0.0372054
MRM2	0.294218	0.122295
PCS60	0.29412	0.113775
MF(ALPHA)2	0.293993	0.059659
HIP1	0.29321	0.084016
ALG3	0.293153	0.143702
ALG6	0.292995	0.157892
RRD1	0.292689	0.138415
SWC7	0.292682	0.0516277
SPE3	0.292624	0.0620985
ORM1	0.292109	0.151952
KRE9	0.292082	0.156092
GSP2	0.291939	0.180604
PDR15	0.291831	0.0980547
APM4	0.291802	0.160748
DFM1	0.291466	0.132781
MRPL20	0.291449	0.075753
CBP3	0.290842	0.156092
RSM7	0.290774	0.166022
ODC1	0.289959	0.176402
HMF1	0.289441	0.123594
SNA3	0.288723	0.161623
PHO8	0.288688	0.122295
ALG9	0.288319	0.160748
RPL31A	0.288266	0.0461495
MRX3	0.288124	0.162007
YDL086W	0.287584	0.160627
TEC1	0.287055	0.0460428
PAR32	0.286631	0.158926
IMA1	0.285794	0.0795263
FMS1	0.2856	0.121457
HEM2	0.28498	0.14718
TRX1	0.284081	0.127337
SKN7	0.283749	0.0980906
GSC2	0.283582	0.181546
TRX2	0.283332	0.0757491
ARP3	0.283178	0.174911
TSC10	0.283093	0.138568
YLL054C	0.282373	0.143702
RPS17A	0.281439	0.041965
TIP41	0.281364	0.162664
AAT1	0.281142	0.127949
CRF1	0.280792	0.0607387
TEF4	0.28073	0.13771
GPD1	0.280554	0.142512
AAT2	0.280531	0.175475
SWF1	0.280443	0.0862817
YMR122W-A	0.28005	0.0666731
ATP2	0.280048	0.156092
RIF2	0.279685	0.0912023
NCE103	0.278723	0.156092
MRPL49	0.278697	0.102369
ARP2	0.278624	0.158926
LPP1	0.278548	0.0926441
INH1	0.277615	0.162642
FMP30	0.277096	0.0980906
YMR265C	0.2767	0.0752894
MAS1	0.276312	0.141256
SDP1	0.276114	0.114873
PRM5	0.275183	0.0980906
PHO84	0.275099	0.0429495
ATG22	0.275057	0.165786
SEN15	0.274823	0.0607387
IST3	0.274243	0.114873
APE4	0.273979	0.102232
ARK1	0.273808	0.1518
EFB1	0.273449	0.0654345
PKP1	0.272968	0.155332
YBR241C	0.272921	0.0878875
MSN4	0.272629	0.158926
DAP2	0.272578	0.122295
ATP10	0.272555	0.158926
TCO89	0.272541	0.138568
SOL2	0.271638	0.16056
CST26	0.271539	0.0711418
COQ5	0.27128	0.16056
OAF3	0.271102	0.0827828
SRX1	0.270899	0.113308
CIR1	0.270689	0.160006
GTO1	0.270502	0.121457
BAT1	0.270479	0.041965
EMG1	0.270165	0.0733072
GPI10	0.270155	0.0837126
ELO1	0.270136	0.0833241
PRS5	0.270116	0.156092
OAC1	0.270002	0.041965
URH1	0.268819	0.138568
YKL070W	0.268756	0.0926441
FRS2	0.268388	0.114873
YPT35	0.26778	0.0906802
CUP9	0.267694	0.146392
HMI1	0.267528	0.0614043
SEN2	0.26739	0.13771
MRPL23	0.267322	0.0980547
ZRT2	0.26705	0.0661925
RPS29A	0.267026	0.059659
TIM11	0.266929	0.114873
AEP2	0.266902	0.0795263
MRF1	0.266683	0.113623
CRT10	0.266658	0.122295
BEM3	0.266399	0.135903
DTR1	0.26588	0.0350152
THI74	0.265682	0.160748
ROT2	0.265151	0.112817
VOA1	0.265068	0.13713
CBT1	0.264921	0.112904
HSP150	0.264762	0.0631368
UGO1	0.264243	0.0978254
SPT23	0.264171	0.0756477
CST6	0.263957	0.0583987
DIE2	0.263489	0.0530444
COX11	0.263182	0.0907498
YNL019C	0.262626	0.100926
YPS1	0.262565	0.1256
DGK1	0.262434	0.13134
RCN2	0.262159	0.0614043
GUK1	0.261788	0.122295
HEM25	0.260983	0.0620985
RPL6B	0.260572	0.05589
PSF3	0.260365	0.0836934
EMC3	0.260196	0.157892
SSA3	0.260099	0.041965
MVD1	0.259872	0.101136
PTK2	0.259799	0.0666731
YHR112C	0.259689	0.13713
PLB2	0.259506	0.13771
PAA1	0.259041	0.0978254
RCH1	0.258776	0.126832
CTR2	0.258676	0.0733072
CTH1	0.258599	0.125019
HIR3	0.258455	0.0974437
RSC3	0.258336	0.101332
PDX1	0.258176	0.0733072
TMA20	0.258077	0.0620985
BNA2	0.258064	0.0939345
YNL095C	0.258048	0.138568
HOR7	0.25785	0.05589
IRC18	0.25769	0.024849
YCR007C	0.257681	0.0912023
RIB2	0.257256	0.116671
MMP1	0.256879	0.0606031
CUE2	0.256877	0.0640167
PCT1	0.25686	0.121079
AVT3	0.256511	0.108178
YMR085W	0.256499	0.142234
LYP1	0.256455	0.0643178
RAX1	0.256256	0.070025
EMP70	0.256218	0.115269
YPK2	0.256199	0.0782727
MGE1	0.256162	0.113775
TVP38	0.256077	0.0989532
HFD1	0.256031	0.122295
YJL127C-B	0.255614	0.0631804
DRS1	0.255214	0.0755595
HPA3	0.255089	0.126577
GZF3	0.255044	0.0704697
RCF2	0.254985	0.070025
STP3	0.254706	0.127337
OLE1	0.254562	0.033162
YNL033W	0.25453	0.0814998
NPR2	0.254523	0.122295
YMR317W	0.254521	0.0752894
FRE5	0.254466	0.0614043
YGR067C	0.25405	0.05589
ERG2	0.253951	0.148361
YKL077W	0.25385	0.144599
YBL055C	0.253711	0.113775
STF2	0.253498	0.0607387
TPD3	0.253487	0.156092
ASH1	0.252933	0.0464979
YJR039W	0.252019	0.059659
YPL088W	0.251682	0.132896
YLR030W	0.251587	0.113775
SAM35	0.251384	0.0795263
FAR7	0.25136	0.102369
KAR2	0.25053	0.0530444
FMP25	0.250353	0.112904
SLA2	0.250297	0.0756477
GCD7	0.250251	0.122295
GPI18	0.250138	0.119155
MST28	0.2499	0.0776776
YDL157C	0.249845	0.0833241
YJR061W	0.249797	0.0607387
ADH6	0.249668	0.113775
LDH1	0.249612	0.101298
TUF1	0.24958	0.121457
NIP7	0.249414	0.0561188
SEC1	0.249228	0.0756477
YBR137W	0.24918	0.0980547
THI80	0.249055	0.0752894
PAN5	0.248983	0.0607387
UBI4	0.248975	0.0622512
MRP21	0.248806	0.094861
RIB3	0.248023	0.126368
STB5	0.247629	0.0607387
CBP1	0.247586	0.0980906
PMT4	0.247583	0.143243
LEU9	0.247494	0.100926
WRS1	0.24747	0.094861
HIS2	0.246973	0.0907498
MRX11	0.246103	0.0614758
VMA1	0.245918	0.0827828
LOT5	0.245365	0.0768425
YJR124C	0.245274	0.0972564
ADR1	0.245023	0.0647823
FRT1	0.244567	0.127944
SPE4	0.244478	0.0773267
MSC7	0.244376	0.0562899
YMR262W	0.244367	0.0720977
PRM2	0.244349	0.0610308
SNX3	0.244261	0.0461495
NUR1	0.243853	0.101332
YHR033W	0.243851	0.0795263
IDP3	0.243588	0.0416948
PTC2	0.243452	0.102369
DPH1	0.243303	0.0607387
CIN2	0.242994	0.076053
RPL35B	0.242965	0.0582337
MRPL15	0.242828	0.0756477
GLN3	0.242379	0.0585672
CAF120	0.24237	0.0678395
APM3	0.242347	0.121457
NAM2	0.242084	0.102232
RFT1	0.241936	0.108178
YAR028W	0.241645	0.0472265
YPT7	0.241047	0.102785
DCG1	0.241023	0.0301338
RIM20	0.240892	0.0795263
ARF3	0.24071	0.0980547
ARC18	0.240264	0.122295
GDA1	0.240062	0.125964
TPH3	0.239852	0.102232
TRE1	0.239647	0.0620985
SSN3	0.239357	0.108178
ARA2	0.238963	0.125964
BST1	0.238795	0.0942178
BRE4	0.238618	0.109464
NCS6	0.238597	0.114873
LSM6	0.23846	0.0678395
TPN1	0.237664	0.103414
GDS1	0.237425	0.0980547
COX5A	0.23712	0.0607387
CSE2	0.237094	0.0444189
RNQ1	0.23633	0.0583987
YBL039W-B	0.23623	0.041965
VMA5	0.235627	0.102369
AVT7	0.235408	0.0795263
ATP22	0.235314	0.109464
RPL35A	0.235119	0.0611117
VPS36	0.235116	0.102369
DCW1	0.234775	0.122295
ZIM17	0.234517	0.102232
SUT1	0.234457	0.0678395
AEP1	0.23439	0.0833241
YLR326W	0.234046	0.0620481
HRQ1	0.234015	0.0979053
GPI19	0.233948	0.041965
SEC15	0.233906	0.0682591
ERV46	0.233701	0.121457
PEX7	0.233579	0.102785
LOT6	0.23305	0.0607387
FCY21	0.232889	0.0605321
NFS1	0.232842	0.11984
YJR015W	0.232595	0.058626
YJU3	0.232156	0.122295
UBX7	0.232079	0.102232
ARB1	0.231589	0.112143
UTP13	0.231493	0.0634551
YGR127W	0.231403	0.102348
MTF1	0.231318	0.0671927
GPA2	0.231188	0.0980906
ATG40	0.231001	0.102232
AGC1	0.230627	0.0538421
SNF4	0.230281	0.101332
CCT6	0.230177	0.0926441
HXK1	0.229577	0.0757491
ATG36	0.229575	0.0690491
NIS1	0.22903	0.0416948
ULI1	0.228962	0.0645507
SER3	0.228834	0.108178
PDA1	0.228741	0.0709046
BIK1	0.228464	0.0782727
ATP20	0.228203	0.0853745
SEF1	0.228179	0.041965
RPL13B	0.22802	0.0358524
AIM2	0.227917	0.109395
TMT1	0.227723	0.0692113
RIB4	0.226917	0.0552285
POR2	0.226863	0.0614758
PDR17	0.226842	0.100926
YHR097C	0.226838	0.0761844
MSM1	0.226828	0.0678395
YPR063C	0.226738	0.094861
CYT2	0.226653	0.0631804
YKR015C	0.226522	0.0620985
YNR071C	0.226466	0.0461495
MAM33	0.226383	0.0907498
YKL068W-A	0.225896	0.0444189
KEL1	0.225581	0.0563541
YMR253C	0.225494	0.0552285
GIP3	0.225271	0.101052
SFB3	0.225193	0.102369
JAC1	0.225133	0.0461495
MEP1	0.224846	0.0568042
FIG4	0.224788	0.0894173
UTP10	0.224676	0.0952574
MHP1	0.224233	0.0498422
GIS2	0.224166	0.100926
POP7	0.223937	0.0607387
YDR222W	0.223353	0.0678395
RCR2	0.223141	0.0620985
IFM1	0.223075	0.0620985
RPL28	0.222943	0.0358524
ATP11	0.222942	0.0965156
PEX12	0.222718	0.0899979
LAP2	0.222123	0.0709046
YMR315W	0.221686	0.0980547
CTR9	0.221317	0.0464979
CUP2	0.221196	0.0607387
IZH1	0.221074	0.044926
THP2	0.220712	0.0434746
MOB2	0.220709	0.041965
CAR2	0.220693	0.0757491
RKM1	0.220417	0.0631804
IMD2	0.220405	0.0333618
INO2	0.22037	0.0607387
RIB1	0.220221	0.112904
RPB2	0.220043	0.0782727
ALG12	0.22004	0.112912
DFR1	0.220023	0.0678395
SHY1	0.219894	0.0620985
YEH2	0.219268	0.0795263
SSK1	0.218962	0.102232
ASM4	0.2185	0.0507628
PKP2	0.21822	0.041965
FTR1	0.218147	0.0620985
FCF1	0.217913	0.0607387
TAH1	0.217723	0.0614758
SDD1	0.217202	0.033162
LEE1	0.217054	0.0933523
GOS1	0.217047	0.0733072
IDP2	0.216695	0.0782727
MNL1	0.216394	0.0550257
MDM31	0.216149	0.094861
CPA1	0.215766	0.0563541
MIC27	0.215702	0.0827828
GAS3	0.215692	0.0755595
PBA1	0.215686	0.0952574
YDL114W	0.215407	0.0179038
CEM1	0.214925	0.0933523
AME1	0.214845	0.0678395
YJL045W	0.214836	0.0374767
UBC7	0.214618	0.0678395
RAD5	0.214526	0.0907498
CSS2	0.214207	0.044926
LPX1	0.213861	0.0972564
PAU10	0.213656	0.0089924
DCK1	0.213355	0.0472036
MPM1	0.213251	0.094861
HXT13	0.213226	0.0358524
YDC1	0.21295	0.0605163
PXP1	0.212774	0.108178
LMO1	0.212726	0.0460428
ASA1	0.212691	0.0846567
GEM1	0.212607	0.0631368
AGP2	0.21257	0.0631804
TMC1	0.212495	0.0631804
ATG15	0.212193	0.107585
UBP7	0.211974	0.0516277
HAL9	0.211944	0.0671927
MLF3	0.211913	0.113775
COR1	0.211862	0.0397021
RGS2	0.2117	0.0460428
RPS25B	0.211644	0.0301338
ERG24	0.21098	0.0585672
YLR001C	0.21066	0.0906802
TIF1	0.209925	0.0980547
TES1	0.209795	0.0631804
YGR125W	0.209763	0.0926441
SAW1	0.209522	0.0631368
WHI2	0.20846	0.0906802
PEX8	0.208433	0.0472036
ELO2	0.208139	0.0827828
YDR124W	0.207618	0.0614758
YFR018C	0.207465	0.110241
TDA1	0.207147	0.0407753
TRM1	0.206542	0.041965
ACK1	0.206497	0.0582337
YJR011C	0.205966	0.0414867
EEB1	0.205708	0.0661925
RLI1	0.205703	0.0620985
MMM1	0.205645	0.0538447
YNL217W	0.205637	0.0530444
FAD1	0.205539	0.0607387
RPL26A	0.20553	0.0350152
MRP4	0.20544	0.0795263
YCP4	0.205359	0.0980906
GUP2	0.205023	0.0530444
MAP1	0.204975	0.0668787
YML6	0.204973	0.0711008
QDR2	0.204781	0.0552285
CSH1	0.20444	0.0620985
PEA2	0.204275	0.0607387
LSP1	0.204217	0.0906802
YHC3	0.203967	0.0845253
PMT3	0.203647	0.0906802
KAE1	0.203559	0.0782727
RRP45	0.203201	0.0757491
TDA4	0.20285	0.0460428
CYC7	0.202662	0.036803
YET3	0.202655	0.101052
RTG2	0.202267	0.0907498
HSP31	0.202227	0.0607387
TMS1	0.202178	0.0601326
PHO13	0.202122	0.0607387
HRT3	0.202102	0.0709046
TGL5	0.201169	0.0410291
PCL10	0.201129	0.0351157
PWP1	0.201075	0.0461495
YCR023C	0.201053	0.0672056
PTP3	0.200894	0.0622512
DBF2	0.200762	0.0607387
OPY1	0.200368	0.0678395
ERG13	0.200116	0.0980547
JID1	0.199984	0.0797903
LCB5	0.199687	0.0837126
SDS24	0.199529	0.0859536
NPT1	0.199411	0.0444189
VPS8	0.199058	0.0561188
BSP1	0.199004	0.0607387
SNG1	0.198995	0.0620481
YTP1	0.198731	0.0492398
MIG2	0.198495	0.0512781
ATG31	0.19772	0.0606031
TMA7	0.197581	0.0330965
YOR292C	0.197573	0.0605163
RMD9	0.19754	0.0620985
GAL4	0.197509	0.0605321
SIR2	0.197508	0.0476618
FAA2	0.197482	0.0631804
SPO24	0.197334	0.0795263
RPE1	0.197267	0.0472036
DTD1	0.197048	0.0381934
YMR102C	0.196962	0.0678395
NOP10	0.196869	0.0301338
GUS1	0.196655	0.0757491
NAS2	0.196615	0.0472036
LAG2	0.196541	0.0530444
SIL1	0.196252	0.0671927
ERV14	0.195716	0.0743865
RPL24B	0.195333	0.0330965
PHO89	0.195228	0.0414867
PCC1	0.195104	0.0275496
LIA1	0.194842	0.0671927
KEL2	0.194174	0.0620985
DER1	0.193926	0.041965
ARF1	0.193919	0.0516277
YAP5	0.193831	0.0649829
GPT2	0.193803	0.0487671
YPT1	0.193692	0.0503625
MRL1	0.193463	0.0631804
YEN1	0.193371	0.0614043
RTT101	0.193356	0.0678395
ARC19	0.193168	0.0797903
UTP11	0.192895	0.0466174
ECM21	0.192837	0.0733072
SPL2	0.192666	0.041965
DBP3	0.192596	0.0460428
RPO26	0.192326	0.0607387
SIP4	0.192105	0.041965
PST1	0.191949	0.079578
YML108W	0.191755	0.041965
PET191	0.191633	0.041965
YMR155W	0.191559	0.0674369
ALD3	0.191272	0.0622512
YJR012C	0.191233	0.0479417
YPR098C	0.191078	0.041965
CDC33	0.190864	0.0460428
ERD1	0.190679	0.0607387
YIL055C	0.190612	0.0599253
MDG1	0.190581	0.0605321
SPG5	0.190566	0.0620985
PPA2	0.190213	0.0622512
SPS1	0.190165	0.0277485
UBA4	0.190087	0.0607387
SPR3	0.189958	0.0092102
ACA1	0.189907	0.0512781
SCP160	0.189905	0.0671927
YPL034W	0.189679	0.040685
SLA1	0.189407	0.0782727
RTA1	0.189245	0.041965
PDR18	0.189038	0.041965
NQM1	0.188689	0.0782727
NAM8	0.188599	0.0516277
MRS3	0.188569	0.0678395
AAR2	0.188412	0.0360167
IBA57	0.18837	0.041965
TUL1	0.188301	0.0563541
UPS2	0.188084	0.0444189
JLP1	0.187993	0.041965
TIF34	0.18796	0.0833241
SDS22	0.187754	0.0678395
PEX29	0.187284	0.0573572
MRPL40	0.187278	0.0607387
ECM31	0.187063	0.0464979
HBN1	0.187025	0.0437195
SUE1	0.186905	0.0605321
BAP2	0.186752	0.0787748
YGR201C	0.186692	0.0607387
SPE1	0.186411	0.0607387
RPL38	0.186295	0.0313632
MDL1	0.186197	0.0756477
FLC3	0.186193	0.0809679
CTA1	0.185875	0.0312008
ALY1	0.185687	0.0756477
GPA1	0.185627	0.0466174
CIR2	0.185548	0.0301338
NGL1	0.185175	0.0620985
VPS73	0.185145	0.0620985
YDR042C	0.184894	0.0172266
MSL1	0.18481	0.0434746
POS5	0.1847	0.057478
EDE1	0.184561	0.0405602
YJR085C	0.184345	0.0514244
KAP114	0.184281	0.0745576
VPS3	0.183596	0.0464979
MSW1	0.18347	0.041965
NUM1	0.183144	0.0434746
MSH2	0.182711	0.0782727
PRR1	0.182662	0.0573572
SML1	0.182644	0.0472036
OST5	0.182518	0.036803
YJR096W	0.182292	0.0605321
PDE2	0.182203	0.0376768
MAF1	0.18218	0.0516277
MPD1	0.182141	0.0620985
NUT1	0.181516	0.0607387
YNL144C	0.180783	0.0330965
MZM1	0.180758	0.0388816
RIM11	0.180466	0.0678395
LSC1	0.180414	0.0756477
CNA1	0.179926	0.041965
QNS1	0.179869	0.0620985
SWP1	0.179717	0.0607387
COX15	0.179367	0.0620481
ETT1	0.179254	0.0591537
PFY1	0.179193	0.0472036
SKI6	0.179108	0.0516277
IAH1	0.178677	0.0538447
YJL107C	0.178246	0.05589
SPH1	0.177974	0.0607387
YDL206W	0.177737	0.0325943
TEL1	0.177511	0.0620985
SAP155	0.177342	0.0325943
TED1	0.177319	0.0757491
YPR003C	0.176986	0.0385251
KAR9	0.176949	0.0507628
GRS1	0.176937	0.0622512
THI2	0.176793	0.041965
BOP3	0.17665	0.0464979
NHX1	0.176637	0.0598824
FOL2	0.176131	0.0433565
DUG1	0.176123	0.0661925
SSD1	0.175946	0.041965
MCM7	0.175799	0.0607387
TRI1	0.175754	0.0477275
RPS23A	0.175225	0.0190024
DBR1	0.175103	0.0605163
PAT1	0.175092	0.0568042
VMA2	0.174643	0.0782727
SSL1	0.174275	0.0464979
SPC25	0.174168	0.0607387
ZWF1	0.174124	0.0756477
TIF2	0.174098	0.0671927
SFM1	0.173897	0.0509666
YIL077C	0.173693	0.0607387
MET16	0.173575	0.0304151
WTM2	0.173411	0.041965
LPD1	0.173252	0.0620985
HER2	0.173247	0.0466174
UBP11	0.172786	0.0568917
YNL193W	0.17264	0.041965
THI3	0.172605	0.0605321
SNL1	0.172416	0.0390989
XDJ1	0.172249	0.0561952
CAF130	0.172227	0.0620481
RCM1	0.172047	0.0540772
MCP2	0.171921	0.0620481
SFA1	0.171533	0.0522928
MBA1	0.17153	0.0607387
REF2	0.171474	0.0459678
YOR114W	0.171323	0.0620985
YDR338C	0.171321	0.0444189
NUT2	0.17127	0.0405602
ENT4	0.171232	0.0455793
CBC2	0.170573	0.0354875
PGM2	0.170314	0.0607387
RDS1	0.170262	0.0607387
YMR206W	0.169987	0.0455793
SLD5	0.169567	0.044926
ESBP6	0.169531	0.0436685
HEL1	0.169464	0.033162
MED4	0.169407	0.0575532
NAT5	0.168934	0.0520974
SFK1	0.168724	0.0388816
YJL068C	0.168634	0.0669148
MKT1	0.168604	0.0607387
GNT1	0.168247	0.0620985
YAK1	0.168078	0.0622512
YFR045W	0.167977	0.036803
ANY1	0.167861	0.0607387
NRD1	0.167676	0.0548608
YHI9	0.167665	0.0434746
TIM54	0.167184	0.0585672
MCD4	0.166867	0.0607387
SRF1	0.166718	0.0605321
MSD1	0.16667	0.0472036
ARC15	0.166466	0.041965
RFS1	0.166433	0.0464979
SRO77	0.166317	0.0464979
YBR053C	0.166131	0.041965
TFB6	0.165851	0.0493455
TFC8	0.165514	0.0552285
PGM1	0.165306	0.0607387
YBR287W	0.165301	0.0333618
SSE1	0.165112	0.0464979
YLR456W	0.164833	0.043493
VAB2	0.1647	0.0328666
VID27	0.164272	0.0464979
REV3	0.16382	0.0464979
FMP41	0.163816	0.0607387
RAD33	0.16354	0.041965
INA1	0.163409	0.036803
YKE4	0.163334	0.0461495
ACF2	0.163269	0.0461495
BCH1	0.162995	0.0620985
YMR226C	0.16292	0.0460428
COX10	0.16257	0.041965
GEP4	0.162545	0.0563541
LCB4	0.162073	0.0563541
PKH1	0.161699	0.0464979
TMA108	0.161642	0.0464979
ATG19	0.161562	0.0607387
YLF2	0.161457	0.0407753
IRC24	0.161176	0.0607387
ARC40	0.160864	0.0563541
MAK5	0.160706	0.041965
SHE9	0.16059	0.0505379
SOL4	0.160585	0.0564444
CPR4	0.160321	0.0620985
INP53	0.160061	0.0571287
CPR6	0.159961	0.041965
YPR114W	0.159708	0.0477275
AIR1	0.159367	0.0238291
YJR142W	0.159269	0.057478
MAC1	0.159062	0.0605163
WWM1	0.15905	0.0388816
MSA2	0.158901	0.0472036
RBH1	0.158616	0.0460428
YDR391C	0.158553	0.0301338
YSC84	0.158547	0.0516277
VHR2	0.157648	0.0397021
APE2	0.157388	0.0631804
TDA5	0.157224	0.0360167
MRS6	0.156956	0.041965
OXP1	0.156679	0.0385251
BNS1	0.156671	0.0405602
MIC60	0.156641	0.0620985
PHD1	0.156545	0.0372054
TIR3	0.156091	0.0501202
DXO1	0.155997	0.0269528
SUR2	0.155854	0.05589
YDL180W	0.155214	0.036803
PAC1	0.154776	0.0313632
APP1	0.154749	0.0585672
SPC3	0.154745	0.0461495
SPT8	0.153937	0.0464979
RIT1	0.153848	0.0396317
AIP1	0.153548	0.0607387
YOR387C	0.153485	0.0361102
RRI2	0.153425	0.041965
GRX5	0.153298	0.0512781
YIR014W	0.153252	0.0444189
NUP42	0.153246	0.0464979
YBR230W-A	0.153218	0.0381934
MTR2	0.153169	0.0512781
PEP4	0.153101	0.05589
YML119W	0.152743	0.0444189
DNL4	0.152565	0.0434746
MRPS28	0.15239	0.041965
HSP26	0.152325	0.041965
YIL108W	0.15212	0.041965
MNN11	0.15191	0.0372054
TRM8	0.151832	0.041965
YHM2	0.151776	0.0332404
DIG1	0.151712	0.041965
RAS1	0.151687	0.0372054
IMO32	0.151505	0.0394258
TBS1	0.150874	0.0382809
RPN11	0.150771	0.0538421
ICL1	0.150762	0.0301338
LSB3	0.15069	0.041965
SGF29	0.150677	0.0466794
ATP4	0.150318	0.0573572
YLR352W	0.150253	0.0472036
TCD2	0.149676	0.0464979
PPR1	0.149173	0.0397021
MSC1	0.149001	0.0320688
ABP1	0.148884	0.0388816
FYV10	0.148584	0.0538421
SAC7	0.148147	0.057478
YKR045C	0.147865	0.041965
CUB1	0.147498	0.059659
ATF1	0.147322	0.0390989
CDC26	0.147079	0.0393614
STB6	0.146939	0.0313632
HYM1	0.146891	0.0414867
CMP2	0.146458	0.0566106
PDH1	0.146419	0.0358524
HYR1	0.146352	0.0330566
SHU2	0.146091	0.0407753
HLR1	0.145634	0.041965
SIZ1	0.145555	0.0332288
SHR3	0.145513	0.041965
RIB7	0.145316	0.044926
COT1	0.145032	0.041965
MTF2	0.144997	0.0432366
POR1	0.14478	0.0434746
GGA2	0.144685	0.0493122
PEX3	0.14457	0.041965
CEP3	0.144426	0.0360167
VMA6	0.144178	0.0437195
SNA4	0.143373	0.0325943
FRE3	0.14333	0.0218698
ALG11	0.143252	0.0460428
TOM71	0.142996	0.041965
YKL063C	0.142983	0.0372054
44705	0.142762	0.0350152
YLR108C	0.142761	0.0313632
SPO7	0.142233	0.041965
NAT1	0.1422	0.0568042
SRP1	0.141834	0.0583987
PIB1	0.141719	0.0461495
GSF2	0.141694	0.0325943
AST2	0.141612	0.0472036
MRPL3	0.141194	0.0461495
ERG7	0.141184	0.0322317
STE23	0.141169	0.041965
GIP1	0.140976	0.0333618
YGL114W	0.140949	0.036803
DOA4	0.14075	0.0460428
SEC23	0.140582	0.0464979
CIT3	0.140056	0.0330965
DRE2	0.140044	0.0538421
HAL5	0.139702	0.0538421
REV1	0.139667	0.0218698
YGL159W	0.139665	0.0313632
SRV2	0.139449	0.044926
HIT1	0.138749	0.0214079
RSM26	0.1385	0.033162
PMI40	0.138379	0.0464979
PSK1	0.138325	0.0383851
TIM23	0.138214	0.041965
CDC6	0.13815	0.0330965
ROD1	0.138117	0.041965
YEA6	0.138076	0.0326496
RER1	0.138058	0.041965
NCW2	0.138037	0.0315504
YLR257W	0.137964	0.0464979
RIM1	0.137951	0.0313632
YNL040W	0.137919	0.0325943
MHR1	0.137686	0.041965
CDC73	0.137476	0.0437195
GRS2	0.137465	0.0279156
KTR1	0.137305	0.041965
RRP6	0.137025	0.0357298
ERC1	0.136969	0.0330566
YDL121C	0.136581	0.0325943
YDL186W	0.136479	0.0235736
YGR066C	0.136191	0.0297607
KGD2	0.136186	0.0455793
PET494	0.136083	0.03247
MRP49	0.135826	0.0315504
YDR262W	0.135797	0.0437195
ERV25	0.135683	0.0395711
YPT11	0.135561	0.041965
RNY1	0.135216	0.041965
FAR1	0.135103	0.0315504
[truncated: 3,374 more rows]

## Sheet: wildtype vs. ∆LUTI
GeneName	log2FoldChange	neglog10(padj)	EMG	SBF
ZIP2	0.000273465	0.000137122	yes
ZIP1	-0.439295	0.797095	yes
YSR3	-0.00151357	0.000515974	yes
YIR016W	-0.0640095	0.0409294	yes
YGL081W	-0.591612	1.34989	yes
YDR018C	0.023858	0.015956	yes
YCR061W	0.172974	0.1302	yes
VNX1	-0.0823673	0.0500505	yes
SPT21	-0.132019	0.120665	yes
SPO16	-0.170493	0.161691	yes
SPO13	-0.433323	0.662231	yes
SPO11	-0.0548144	0.0275241	yes
SPO1	-0.157089	0.144541	yes
SMC6	-0.236844	0.308379	yes
SEN34	-0.596958	1.49076	yes
SCC2	-0.169498	0.182814	yes
SAE3	-0.369194	0.4259	yes
RNR1	0.269762	0.406883	yes
RNP1	-0.823781	2.48405	yes
RNH201	-0.150636	0.117785	yes
RMA1	0.516749	0.706696	yes
RED1	-0.398465	0.727901	yes
REC8	-0.318028	0.501431	yes
REC114	-0.670801	2.00051	yes
REC102	-0.157156	0.126152	yes
PRI2	-0.339073	0.467718	yes
PRD1	-0.0517352	0.0362787	yes
POL2	-0.130444	0.131349	yes
POL1	-0.0976056	0.0860329	yes
PMS1	0.0385862	0.0261427	yes
PDS5	-0.315927	0.478663	yes
PCH2	-0.665634	2.08635	yes
NUS1	-0.0813344	0.0518494	yes
NSE4	-0.114363	0.0772324	yes
NDJ1	-0.452115	0.801706	yes
MSH5	-0.330736	0.509741	yes
MSH4	-0.380426	0.644847	yes
MRC1	-0.291796	0.450093	yes
MND1	-0.350782	0.5571	yes
MER1	-0.332094	0.513577	yes
MEK1	-0.285365	0.366458	yes
MEI5	-1.05231	5.20988	yes
MEI4	-0.451528	0.871837	yes
ILM1	-0.156444	0.126152	yes
ICL2	-0.513792	0.993627	yes
HOP1	-0.178033	0.1831	yes
HMG2	-0.118563	0.0924158	yes
HED1	-0.527294	0.981342	yes
HCM1	-0.142864	0.126208	yes
FKS3	-0.351838	0.450229	yes
ESC8	-0.225824	0.269431	yes
ECO1	-0.233313	0.241869	yes
ECM11	-0.648412	1.23867	yes
DPB2	-0.231733	0.241827	yes
DOC1	-0.398627	0.531697	yes
DMC1	-0.558284	1.13136	yes
CWH41	0.046754	0.0324395	yes
CTF4	0.0134191	0.00801117	yes
CST9	-0.0456601	0.0283691	yes
CSM4	-0.322643	0.343946	yes
CDC45	-0.395752	0.762506	yes
CDC21	-0.381944	0.701967	yes
BUB3	-0.171071	0.167137	yes
ASF1	-0.624149	1.3434	yes
SWE1	-0.0720505	0.0518494	yes	yes
TOS4	-0.125426	0.10941	yes	yes
AGE1	0.535054	0.875691		yes
AGP1	0.6672	1.13136		yes
ALG14	0.05453	0.0324395		yes
AMF1	0.436718	0.542457		yes
AQR1	-0.04617	0.0187617		yes
BBP1	-0.196653	0.13642		yes
BUD9	0.341977	0.347487		yes
CAP1	-0.0734568	0.0518494		yes
CBF2	-0.227965	0.265149		yes
CCW12	0.878202	2.4346		yes
CIS3	0.757191	0.168248		yes
CLA4	-0.170966	0.18776		yes
CLB2	0.0457438	0.0233647		yes
CLN1	0.502447	0.573303		yes
CLN2	0.0834516	0.0524609		yes
CLN3	0.0628437	0.034416		yes
CRH1	0.267254	0.367102		yes
CSI2	0.51324	0.637377		yes
CWP1	0.762844	2.15463		yes
CWP2	0.261397	0.186315		yes
ECM33	0.644675	1.13136		yes
ENV9	0.102993	0.0747805		yes
ERG11	0.453355	0.717462		yes
ERG4	0.331821	0.479044		yes
EXO5	0.290132	0.317993		yes
FKS1	0.334894	0.468678		yes
GAS1	0.668815	1.68483		yes
GAT2	-0.302201	0.448967		yes
GFA1	-0.0457249	0.0335543		yes
GIC1	0.14149	0.096928		yes
GIC2	0.0613617	0.039538		yes
GTB1	-0.107979	0.0903213		yes
HHO1	-0.247208	0.274254		yes
HO	-0.228127	0.108872		yes
HOG1	-0.106648	0.0860329		yes
HSL1	-0.165791	0.172601		yes
HTZ1	-0.0469738	0.0261427		yes
HXT3	0.0766268	0.0486928		yes
IPT1	0.369989	0.538305		yes
KCH1	-0.122395	0.0879833		yes
KRE6	0.189562	0.188168		yes
LAC1	0.190955	0.196261		yes
LTE1	-0.0751671	0.0520257		yes
LYS20	1.04899	3.01161		yes
MIT1	-0.112474	0.0968621		yes
MNN5	0.0155777	0.00865432		yes
MSB2	0.0905733	0.0498276		yes
NAN1	-0.0471223	0.0266981		yes
NDD1	-0.423764	0.68915		yes
NUD1	-0.0928495	0.058342		yes
PCL1	0.919178	2.02808		yes
PCL2	0.284896	0.28907		yes
PDR1	-0.276635	0.368884		yes
PDR16	0.203521	0.152738		yes
PET54	-0.398225	0.569205		yes
PET9	0.249468	0.363673		yes
PIL1	-0.118955	0.096928		yes
PLB3	0.0329535	0.0207491		yes
PLM2	-0.232313	0.228848		yes
PMC1	-0.0295613	0.0217876		yes
POG1	-0.0164167	0.00897697		yes
PPN1	-0.201047	0.201685		yes
PRY1	0.118966	0.0632126		yes
PTH4	-1.01052	1.07502		yes
RAX2	0.332536	0.352726		yes
RPL18B	0.214066	0.16067		yes
RPL37A	0.577167	0.595039		yes
RSR1	-0.258264	0.313543		yes
SCW4	0.201404	0.23151		yes
SED1	-0.465277	0.797098		yes
SFG1	0.293513	0.261177		yes
SIM1	0.322328	0.377692		yes
SKM1	0.152815	0.15436		yes
SLM4	-0.0859621	0.0524609		yes
SNF11	-0.0953712	0.0544019		yes
SOK2	-0.0864073	0.0672746		yes
SPB1	-0.138438	0.0780298		yes
SPO20	-0.114263	0.0707012		yes
SRL1	0.429659	0.398748		yes
SUR1	0.22564	0.28907		yes
SVS1	-0.229123	0.197145		yes
TOK1	0.386075	0.590476		yes
TOS2	-0.0701534	0.0370604		yes
TOS3	0.0382171	0.0200569		yes
TOS6	0.461185	0.406275		yes
TOS8	0.27078	0.280058		yes
TYE7	0.193778	0.116015		yes
UTH1	-0.182047	0.146819		yes
UTR2	0.324037	0.534868		yes
YAT1	0.341898	0.482592		yes
YBL029W	-0.342483	0.544029		yes
YBR071W	0.12596	0.091119		yes
YDL183C	0.00866864	0.00391131		yes
YGR153W	-0.713817	1.68483		yes
YHP1	0.756782	1.00172		yes
YKR011C	-0.25249	0.339279		yes
YOL019W	0.266703	0.213651		yes
YOR342C	0.12543	0.0715209		yes
YOX1	0.0807099	0.0544736		yes
YPS3	0.241849	0.228755		yes
YSY6	-0.696349	1.14353		yes
ZEO1	-0.185338	0.10449		yes
YCL068C	10.0826	7.54349
HIS4	1.21373	0.457933
GRE2	1.15119	3.03457
YGR035C	1.11828	1.68483
TDH3	1.11773	2.36625
YHR213W	1.1085	1.18362
ADH5	1.09847	2.73572
ATG41	1.0734	4.53265
PGK1	1.0059	2.14662
YRO2	0.997309	1.54851
GPM1	0.995267	2.09744
PAU17	0.990224	1.13136
CYC1	0.985304	1.9365
TPI1	0.963766	2.19834
BOL3	0.958072	1.19826
LEU4	0.949505	2.21204
ENO2	0.947322	0.396814
YGP1	0.946033	2.83193
PGI1	0.936417	1.70019
YML131W	0.933789	2.88797
SDH2	0.916168	3.65358
PDC1	0.912845	0.315845
YGL117W	0.911178	2.32248
TDH1	0.901556	2.48405
PMA1	0.892444	1.5796
MAN2	0.890933	1.18838
TDH2	0.888477	1.46761
FBA1	0.887636	1.8024
ENO1	0.87852	1.46761
CPA2	0.877333	1.43215
RGI1	0.860882	1.46761
YJR161C/YDL248W	0.852917	2.56544
DLD3	0.851922	2.29624
RPL30	0.842673	1.70019
SHM2	0.841368	2.08056
HOM3	0.840318	1.40023
RPS12	0.824524	1.53286
YPL264C	0.821594	1.2662
PAU7	0.818819	0.86122
MRH1	0.813474	1.70019
THI73	0.809675	1.28963
FMP33	0.807982	1.28442
RPS16B	0.802578	1.17529
YLR125W	0.800276	0.590476
COA2	0.784039	1.34323
QCR10	0.782267	2.65849
ERG28	0.779945	1.70019
DIP5	0.779837	1.33615
PIR3	0.778236	2.31958
FMP48	0.761901	2.28483
ARO4	0.760719	1.29839
ARG3	0.759972	1.70019
RPL9B	0.759642	1.35198
PDR5	0.756974	2.32182
ARO1	0.755987	1.11437
ILV3	0.75559	1.65587
RPL2B	0.75352	1.65319
CDC19	0.753268	1.319
COS12	0.753254	0.981956
ADE17	0.752675	1.05442
SSU1	0.751912	1.34323
IDP1	0.750021	1.44019
RPS2	0.741606	1.55133
CHA1	0.738685	1.4557
ASC1	0.736007	2.00051
ARG8	0.735109	1.68483
YCR031C_pseudogene	0.732179	1.55133
PRP11	0.72773	1.46761
ZRT1	0.725616	1.79735
ADH1	0.722037	1.11437
GPP1	0.719239	2.08056
ARG1	0.718676	1.70019
RPB10	0.717565	0.544029
RPL1B	0.71718	1.34989
RPL1A	0.713454	1.46761
CTT1	0.705958	1.04107
ATO2	0.70595	1.91074
PIR1	0.704581	1.0012
GLY1	0.702135	1.90409
RPS22A	0.701162	1.18838
ADE12	0.700835	1.48336
RPP0	0.700821	1.24672
YHR210C	0.69167	0.534868
GLN1	0.690332	1.91074
FRM2	0.689825	0.944922
RPP1B	0.689744	1.1214
TKL1	0.689196	1.10477
LYS1	0.686716	1.00103
SAM2	0.685897	1.81636
BIO5	0.685612	1.31113
YIL166C	0.68529	1.04613
RPS24B	0.684263	1.33286
RPL21B	0.68349	1.28147
SDH1	0.683483	2.10199
ARG5,6	0.683315	1.12973
GLT1	0.681311	0.980839
YPS6	0.680639	1.68483
PUT4	0.680577	1.28442
SUN4	0.678756	1.02539
ALD6	0.678634	1.02932
MET17	0.678299	1.11437
URA2	0.677828	0.923544
QCR9	0.677162	1.18851
RPS18A	0.67506	1.12666
THI4	0.671197	0.495092
DSE1	0.670483	1.05487
MET6	0.666126	1.38909
RPL3	0.66566	1.33781
ASN1	0.662871	0.754128
PPM1	0.660994	1.48336
DSE2	0.656019	0.182814
HOM2	0.649473	1.05487
MF(ALPHA)2	0.646609	0.453071
ILS1	0.644511	1.11437
URA10	0.64446	1.14381
MET5	0.642472	1.13136
RIP1	0.639755	1.68483
COX6	0.638225	1.68483
YHB1	0.637609	1.16157
CMC4	0.636491	0.697133
STR3	0.635819	1.08145
ATO3	0.635338	1.38909
VHT1	0.634425	0.893893
RPL17B	0.630953	1.04348
PPT2	0.628344	0.660265
ATR1	0.627755	1.24672
YHR214W/YAR066W	0.625735	1.11671
ACS2	0.621304	1.54851
GPX1	0.618431	1.01958
ERG5	0.616344	1.46761
SAM3	0.615067	1.12859
ARE1	0.614448	1.38909
FLO5	0.613344	1.13473
FRE7	0.612086	0.482592
EMC6	0.60887	0.731602
AMN1	0.608558	0.70087
BIO2	0.608298	1.02324
CTS1	0.607716	1.04107
TMA19	0.606879	0.997303
PFK2	0.606189	1.17529
RPL9A	0.605713	0.558239
RPS1A	0.604608	0.994595
EFT2	0.604166	1.32268
HTD2	0.601947	1.02517
YOP1	0.601923	1.54851
PSA1	0.601839	1.41913
PIS1	0.599958	0.901684
COX26	0.599836	0.665107
RPS8B	0.599378	0.924826
TEN1	0.598621	0.363673
YNR021W	0.596952	1.07008
KNH1	0.596801	1.04613
SMP1	0.595138	0.56368
ICY1	0.595078	1.18362
RPS4B	0.594611	0.913232
HMG1	0.594012	1.07578
RPL20A	0.594005	1.03667
RGI2	0.593878	1.24672
EGT2	0.593218	0.116892
RPL27B	0.592479	0.662231
SSB2	0.592168	1.46761
EFT1	0.592024	1.29839
YJL133C-A	0.591579	0.757308
YGL039W	0.591255	0.893893
ACO2	0.591161	0.897777
ICP55	0.588225	0.981309
MPC2	0.588116	1.31543
FMP23	0.586455	1.11437
TRP5	0.58606	1.11437
POM33	0.585604	1.07502
RPS9A	0.584761	0.209383
ARN1	0.58417	1.38909
ACT1	0.583367	1.54851
PMA2	0.582825	1.30858
ILV5	0.582479	1.09091
QCR8	0.582373	1.11437
MCR1	0.582088	1.55133
MIR1	0.581525	1.28963
PHO5	0.580632	0.704219
VBA2	0.579649	0.977441
PAU2	0.57788	0.627461
YJR115W	0.577317	0.78071
FCY2	0.577098	1.07008
THI22	0.575328	0.771381
RPS29B	0.575147	0.793048
YEL068C	0.574288	0.509741
HIS3	0.573911	0.712079
ARG7	0.570422	0.674774
FLC1	0.570378	0.881027
RPS21A	0.56944	0.744082
YMR122W-A	0.569313	0.979067
SCW10	0.568957	1.04107
DDR48	0.568461	1.17529
FMP45	0.567915	0.981309
ILV2	0.565508	1.04045
VCX1	0.564837	1.11437
DSF1	0.563631	0.544029
YAT2	0.562083	1.24672
HMS1	0.559935	0.809648
SLO1	0.557981	0.279954
YAR071W/YHR215W	0.557459	0.68915
TEF1	0.555274	1.54851
MRPL44	0.555156	0.371361
ARG4	0.554797	0.943809
PMU1	0.554541	0.758084
TAL1	0.554241	1.12288
ILV1	0.553987	0.981309
YNR061C	0.553323	0.993627
THI72	0.550195	0.697239
TEF2	0.54906	1.49076
SOL1	0.548823	0.9329
ERG9	0.546437	1.13099
ARO3	0.545852	0.813415
SOD1	0.545655	1.25718
YJL127C-B	0.545581	0.590476
WTM1	0.545573	1.28442
SCS7	0.544635	1.13099
BSC5	0.544605	0.607488
NIT1	0.54438	0.697133
GGC1	0.543407	1.01322
THR1	0.543369	0.854172
CYB5	0.542982	0.797098
TPS2	0.542222	1.12666
RPP2A	0.540139	0.804427
AIR2	0.539876	0.796098
SDH3	0.539724	1.33781
YNL010W	0.539682	0.908419
BOP2	0.53945	1.0862
SPL2	0.539184	0.986619
YNL190W	0.539094	1.01322
FAA3	0.537753	0.880897
PHO84	0.537374	1.33781
AHP1	0.537332	1.22601
MRX14	0.536957	0.637377
COX7	0.535436	0.897777
STM1	0.535042	0.981342
MXR2	0.534647	0.981342
YKL070W	0.534413	0.758684
TPA1	0.533857	0.86122
TOS1	0.531668	1.02005
RPL21A	0.531394	0.620305
SNA2	0.524958	1.02324
PGU1	0.524814	0.719501
PPM2	0.523937	0.450093
YLL056C	0.522685	0.775194
MRI1	0.521505	0.70087
PLB1	0.521091	1.07946
SEC53	0.518911	1.17723
TOH1	0.518176	1.1214
ATP1	0.516317	1.05528
RPS23B	0.515595	0.533317
SHH4	0.514972	0.797098
FET3	0.514105	0.885363
ADE3	0.513391	0.995051
RPP2B	0.513098	0.529462
SER1	0.513039	1.02324
DSE4	0.511752	0.524017
RPL36A	0.511031	0.565464
COX4	0.510649	1.13136
AIR1	0.509811	0.321658
RPL8B	0.507905	0.890443
PDC5	0.507248	0.565464
BDH1	0.507013	1.05175
SSB1	0.506699	1.00733
LYS21	0.505772	0.962266
BIO3	0.505277	0.783971
TSA1	0.505253	1.22284
ADE13	0.505213	0.964793
NTF2	0.505177	1.02932
RPS0B	0.505122	1.0862
DDR2	0.504814	0.553703
YDR025W/YBR048W	0.503455	0.505209
MCP1	0.503182	0.92552
DED81	0.503051	0.717462
ERG1	0.502725	0.758684
HXT5	0.502616	1.24672
ICS2	0.502476	0.361711
TRP3	0.501953	0.889691
RPS3	0.501305	0.5571
YLR050C	0.500337	0.981342
RPS7B	0.499962	0.534868
TRX3	0.497948	0.957841
YHR020W	0.497815	0.655703
RSB1	0.497483	1.11437
ADK1	0.497347	1.03667
RPL10	0.496598	0.558239
COX13	0.496589	1.20415
RNR2	0.495977	1.10477
SRL4	0.494573	0.532344
APT1	0.494535	0.813719
RPS26B	0.494306	0.765516
ADE1	0.494225	1.05487
TPO1	0.494006	0.799311
LEU1	0.493411	0.78071
HOM6	0.492834	0.987589
SAD1	0.492753	0.33889
GPH1	0.492524	1.07008
CHO1	0.492449	1.11938
YLR152C	0.491958	0.70087
TIM8	0.491573	0.21742
FRE3	0.491486	0.500198
YER076C	0.490692	0.59247
ENA1	0.489386	1.03667
ERI1	0.488412	0.231651
YDR541C	0.488341	0.77692
MEP3	0.486337	0.68915
DML1	0.485568	0.629548
RPS8A	0.485343	0.56359
RPS7A	0.485093	0.118343
PRM15	0.483384	1.07502
YHL018W	0.483179	0.407718
RPS5	0.478643	0.662231
PNS1	0.478379	1.09091
FMP42	0.477683	0.813719
IPK1	0.477541	0.5571
PIC2	0.476946	0.835796
LYS2	0.476462	0.854537
FAS2	0.476365	0.934619
KGD1	0.47413	0.872621
NCE102	0.471098	0.867026
CAB2	0.470354	1.05487
FUR4	0.469655	0.72688
CPR3	0.469196	0.65898
TAT1	0.468025	0.637978
YJR156C/YDL244W	0.467501	0.623583
ARO8	0.467386	0.539169
YCL012C	0.46724	0.771381
SPC1	0.466805	0.495092
PRO1	0.46635	0.623265
YHR140W	0.465643	0.851719
FRE2	0.463712	0.398395
UGA1	0.463347	0.962266
LDS1	0.462724	0.55069
EXG1	0.462003	0.571869
RPL13A	0.460627	0.441652
BGL2	0.45953	1.11437
ARI1	0.459236	0.343946
VHR2	0.45899	0.542457
IMA5	0.458571	0.465659
AAR2	0.458001	0.551016
COQ2	0.457515	0.526384
RPL15A	0.456944	0.696646
PAU6	0.456901	0.170827
TIF6	0.456321	0.981342
MAS2	0.456171	0.786723
DFG10	0.456131	0.245084
ORT1	0.454884	0.536528
VPH2	0.45484	0.264596
ARG2	0.454394	0.893893
YFH1	0.453619	0.498958
EHT1	0.453117	0.986619
QCR2	0.452517	1.06987
YHK8	0.451347	0.50934
DCK1	0.450711	0.797095
COS6	0.45068	0.78071
IMP2	0.450573	0.497572
CIN10	0.449455	0.86122
PFK1	0.448514	0.906863
SAH1	0.4481	1.04613
COX8	0.447818	0.499884
YLR179C	0.44746	0.568402
TVP23	0.447118	0.72688
CYB2	0.447077	0.776316
CCP1	0.44635	0.681875
GCY1	0.446267	0.6122
YHR180W	0.445825	0.393639
RPP1A	0.445703	0.524017
SCW11	0.445468	0.662231
GDH2	0.445223	0.890443
CTM1	0.44236	0.551016
IMA1	0.441799	0.435784
ACO1	0.440129	1.07008
AAP1	0.440042	0.56359
UIP3	0.439941	0.68915
SUS1	0.439862	0.361711
LYS12	0.439089	0.805684
AIM6	0.438354	0.734004
SOD2	0.438194	1.02356
YNL134C	0.437271	0.876654
GLO1	0.437203	0.813719
PRM2	0.436825	0.371361
YPT35	0.436764	0.494301
SAM1	0.435815	0.662089
YGL262W	0.435244	0.44974
KRE2	0.434615	0.804427
YAR023C	0.434343	0.513577
ACH1	0.434319	1.00995
SNQ2	0.434237	0.918533
DPS1	0.434142	0.676713
THI7	0.43385	0.786723
HSP26	0.433288	0.616508
GPG1	0.432763	0.731602
FAT3	0.432745	1.0012
SPS100	0.431611	0.555688
IML2	0.431447	0.899051
ADH4	0.431148	0.627461
TSL1	0.431048	0.744082
YML108W	0.430646	0.351259
VAS1	0.430523	0.762506
PFA5	0.429933	0.655044
FAS1	0.429708	0.910495
NAR1	0.428839	0.603907
YPR170W-B	0.428825	0.48827
ALD5	0.428457	0.524017
PRP39	0.428275	0.534868
MAE1	0.427931	0.821956
TDA6	0.427484	0.371361
HSP104	0.427349	0.977441
GCN4	0.426648	0.980153
DLT1	0.425781	0.435912
SCP1	0.425705	0.417079
ALT1	0.425692	0.588415
GUT2	0.425041	0.68915
LDB17	0.424893	0.580953
KAP122	0.424315	0.542457
NDI1	0.424007	0.783971
HXK2	0.42255	0.261177
SMK1	0.42236	0.505209
RPS28B	0.422266	0.420244
LYS9	0.422035	0.609979
SDH4	0.421674	0.744082
YPQ1	0.421326	0.631893
LEU9	0.420876	0.730993
CCC1	0.420237	0.843435
POC4	0.419568	0.313416
GSP1	0.419157	0.696646
PSF1	0.418652	0.486434
GAL80	0.418292	0.627461
PHO3	0.417932	0.456825
LAP3	0.41679	0.784155
ERG3	0.416595	0.558239
ACC1	0.415863	0.718409
KRS1	0.414458	0.662231
YCF1	0.41428	0.623459
AQY1	0.412373	0.774313
YJL045W	0.412156	0.813719
PYC2	0.411826	0.576814
GOR1	0.411489	0.754128
UPS1	0.410694	0.609979
GAD1	0.410601	0.783971
PEX11	0.409838	0.736912
BSC6	0.409481	0.518271
YKL071W	0.40855	0.483533
TMN3	0.408393	0.629316
UGA3	0.40837	0.445453
HST4	0.408129	0.454134
SNO1	0.408104	0.5571
OLA1	0.407975	0.553703
YJL193W	0.407766	0.48333
YNR062C	0.407026	0.299259
ZPS1	0.406452	0.589702
APE1	0.406131	0.797098
OAF3	0.405883	0.558811
TDA2	0.405758	0.312609
UBX6	0.405388	0.754128
ATG22	0.404838	0.801649
POP7	0.40446	0.398395
TSC13	0.404119	0.757474
ERG26	0.403534	0.662231
RPL5	0.403257	0.65092
TRP4	0.403175	0.522484
GPC1	0.402895	0.68915
ENB1	0.402094	0.736912
RIM9	0.401905	0.417079
OYE2	0.401686	0.633488
YNL320W	0.401348	0.662231
YIP1	0.401127	0.637377
TNA1	0.400635	0.676713
STL1	0.400164	0.457933
RRT12	0.399602	0.385863
SAP4	0.398898	0.482592
YMR31	0.398459	0.764464
CHC1	0.398321	0.696646
GLG1	0.397792	0.565464
TRP2	0.397465	0.465659
CEM1	0.396914	0.662231
YAR028W	0.396308	0.213651
IRC15	0.395866	0.602087
FMN1	0.395851	0.51379
ARA1	0.395174	0.616587
STE3	0.395154	0.343082
AXL2	0.39514	0.48333
RPS16A	0.394546	0.552059
HNM1	0.394245	0.757474
HEM1	0.394211	0.531697
ISF1	0.392045	0.609979
GUT1	0.391808	0.797098
VBA1	0.391726	0.424076
RKR1	0.391583	0.471135
YPQ2	0.390972	0.662231
CAF20	0.390438	0.552275
YDL121C	0.389838	0.388125
MES1	0.389837	0.731774
MDM32	0.3895	0.555688
KIN82	0.389391	0.509741
ADE6	0.388939	0.573303
FUI1	0.388657	0.377721
FSH1	0.387674	0.309438
MNN1	0.387474	0.5571
CHS2	0.38671	0.0715209
DLS1	0.38662	0.394928
URA6	0.386481	0.428295
SSC1	0.385594	0.738043
STF2	0.384905	0.318825
SYS1	0.3846	0.534431
IQG1	0.384556	0.398395
GPD2	0.384367	0.662231
VRG4	0.384053	0.551474
CPS1	0.383524	0.482592
RPL24A	0.383219	0.272911
RPS4A	0.383141	0.428078
FUN26	0.38307	0.475229
SMP3	0.382898	0.532344
DAL82	0.382337	0.469655
SUC2	0.381818	0.736912
SRY1	0.381664	0.551016
YBT1	0.381273	0.55069
RLI1	0.381256	0.662231
CHO2	0.381124	0.68915
CIR2	0.380483	0.609979
GND1	0.380393	0.529462
IZH3	0.379622	0.579394
DUR3	0.379106	0.399876
RPL27A	0.378444	0.353934
RPL12B	0.378101	0.457933
TPO2	0.377968	0.762506
PAB1	0.377525	0.620305
PGA1	0.376534	0.368114
COX12	0.376021	0.569205
PFA3	0.375935	0.484635
RPL36B	0.375822	0.398395
SUL2	0.37505	0.326232
YGR067C	0.374699	0.524853
NGL1	0.374643	0.539289
ARO2	0.374081	0.406883
NDE1	0.373668	0.765516
YHR078W	0.373447	0.49761
ADE5,7	0.373325	0.68915
SPI1	0.372107	0.428295
GTT2	0.371131	0.478663
TFS1	0.370601	0.640848
ATP7	0.37055	0.70976
YJR061W	0.370447	0.484055
RPL8A	0.370292	0.438903
LOS1	0.370037	0.524853
PRX1	0.370008	0.621949
YCL002C	0.369984	0.446466
MRX11	0.369904	0.261704
YPL162C	0.369874	0.37355
RPL12A	0.369449	0.341781
ERP6	0.368609	0.478663
EMP47	0.368207	0.420356
APA2	0.367603	0.544029
SOL3	0.367292	0.311183
COM2	0.367015	0.467718
ICT1	0.366096	0.594954
RPL18A	0.365906	0.314483
OPI3	0.365877	0.554865
THI21	0.365156	0.441652
HPT1	0.365132	0.403664
ATP10	0.365121	0.451519
DIA3	0.364974	0.52672
YPR196W	0.364897	0.545285
TPO3	0.364108	0.553841
ERG20	0.363608	0.498492
YJR039W	0.36317	0.55069
AMD2	0.362939	0.574737
VMR1	0.362777	0.428295
ATG29	0.362186	0.409025
DAD1	0.36193	0.278361
LOT5	0.36156	0.398395
YPC1	0.361514	0.441652
TRS31	0.361219	0.439856
MEP2	0.361136	0.238493
CWH43	0.361069	0.545285
PAU13	0.360735	0.12621
COS9	0.360632	0.569205
CIS1	0.360124	0.35242
MET10	0.35993	0.371361
RMD6	0.359809	0.308379
CDD1	0.359049	0.236932
MRPL33	0.35867	0.200596
YEF3	0.3584	0.657121
SYM1	0.357391	0.442993
CYT1	0.356977	0.457933
THG1	0.356423	0.371175
RPS1B	0.356141	0.391789
RNR4	0.356132	0.609979
POA1	0.355822	0.306032
MTQ1	0.355648	0.326961
EMG1	0.355034	0.251052
CSS3	0.354689	0.261177
MRPL9	0.354687	0.371361
RPS28A	0.354428	0.468678
PDR18	0.354276	0.531611
GNP1	0.353892	0.44974
PDX3	0.353598	0.497893
HEM15	0.353307	0.491828
TMA20	0.352594	0.427073
FYV4	0.351843	0.269057
CDH1	0.351706	0.550355
AMD1	0.351682	0.409025
ADR1	0.351169	0.650184
ALG6	0.35113	0.538572
ASN2	0.351003	0.529075
UTR4	0.349792	0.442249
LYS4	0.349492	0.371361
PCL5	0.348564	0.345468
ZRC1	0.348382	0.545285
PDR8	0.347895	0.403664
LAS21	0.346588	0.430534
THR4	0.34624	0.467718
SEC21	0.346221	0.562301
RRF1	0.346173	0.253172
CTA1	0.346119	0.539693
RDS1	0.346052	0.51379
PRM5	0.345986	0.504201
SHM1	0.344276	0.491828
YAH1	0.343795	0.371361
CPR1	0.343507	0.609979
PHO88	0.343377	0.532344
RSC3	0.343188	0.475681
TPS3	0.342764	0.562301
RPL11A	0.342473	0.289383
PTR2	0.341386	0.38477
YDR249C	0.340884	0.192882
VPH1	0.340464	0.555688
PAU5	0.340127	0.171097
RPS24A	0.340027	0.254094
URB2	0.339835	0.334077
YPL090C/YBR181C	0.339826	0.269514
POL30	0.339369	0.555688
UBC11	0.339101	0.215746
BST1	0.338923	0.439856
ATX2	0.338636	0.362269
NSG2	0.338235	0.545285
RBD2	0.338015	0.434355
NYV1	0.337967	0.482592
YJR124C	0.337827	0.367102
PDB1	0.337746	0.555688
YPL067C	0.337613	0.251052
RPL16A	0.33707	0.299044
COQ5	0.336254	0.544338
AVT5	0.336098	0.448925
ALG9	0.335341	0.429271
YOR387C	0.335337	0.251389
HSH49	0.335158	0.371361
AGX1	0.335014	0.518271
MTO1	0.333888	0.324992
COF1	0.333876	0.494301
YDL124W	0.332317	0.544029
YIF1	0.332115	0.453071
HAM1	0.331808	0.232845
YDL218W	0.33161	0.243781
PEX15	0.331565	0.451519
GLN4	0.331415	0.524733
TMA10	0.330921	0.571869
BPT1	0.33065	0.411805
COQ9	0.330406	0.439117
NMA1	0.330387	0.396004
APM3	0.3303	0.443656
GCV2	0.330193	0.501431
GEP5	0.330023	0.287245
SPR6	0.329527	0.31102
SST2	0.329525	0.343946
HBT1	0.329146	0.448225
TRP1	0.328704	0.219591
TCA17	0.328465	0.152405
YIR042C	0.327933	0.0756663
COA1	0.327806	0.408279
HIS1	0.327449	0.371361
SEO1	0.327414	0.369278
ALA1	0.327404	0.565464
AYR1	0.326034	0.443465
HEM13	0.325985	0.527954
RAM2	0.325502	0.443576
SGF29	0.324563	0.429271
ATP2	0.324346	0.55069
YLR042C	0.324315	0.126208
YPF1	0.324237	0.410813
DED1	0.324208	0.420244
SOL2	0.323954	0.517225
MDM31	0.323717	0.43074
CDS1	0.323634	0.482592
MHO1	0.322903	0.484055
MDM36	0.322551	0.494301
SMF3	0.322371	0.409224
YKR070W	0.321752	0.448925
THI74	0.321128	0.497572
YLR460C	0.320739	0.136006
DAL3	0.32067	0.301668
XPT1	0.320567	0.35242
ASH1	0.320399	0.363557
PDR12	0.32035	0.495092
ATG10	0.319799	0.171097
YHC3	0.319404	0.410813
NCR1	0.319353	0.394293
DAK2	0.319069	0.221229
CSR2	0.318931	0.42867
PLB2	0.318797	0.422277
GRE3	0.318734	0.457933
IRC3	0.318579	0.404144
DAL5	0.31844	0.0524609
PPH21	0.317945	0.484408
TIM13	0.317754	0.269514
PKP2	0.317214	0.331807
IAH1	0.316994	0.367102
APM1	0.316691	0.322782
TEF4	0.316669	0.467253
PEX32	0.316586	0.297327
RPL6B	0.316438	0.313543
TRM3	0.315952	0.418516
TED1	0.3159	0.484055
TOM20	0.315586	0.377692
IFM1	0.315463	0.287245
YBR137W	0.315396	0.351922
IMD2	0.315158	0.114619
GDH3	0.314896	0.28907
GLR1	0.314836	0.428295
GAP1	0.314815	0.269431
SEN15	0.314591	0.163834
FMP30	0.314557	0.337691
SIR2	0.314238	0.397436
MMF1	0.31377	0.407718
ECM3	0.313707	0.321658
INO1	0.313684	0.528999
ATP15	0.313523	0.403664
IDP3	0.31302	0.322782
CMD1	0.312566	0.443882
DCC1	0.312441	0.371361
SDS23	0.312135	0.482592
SHU1	0.312101	0.129685
RPB2	0.311999	0.475681
SIP18	0.311798	0.386199
YMC2	0.311768	0.296934
RPL14B	0.311738	0.0591392
ELO2	0.311667	0.368884
SPF1	0.31147	0.48333
AEP3	0.311341	0.297425
ZRT2	0.311194	0.459094
GPB1	0.311008	0.465659
YPK2	0.310794	0.504231
DUG1	0.31057	0.471135
GCR1	0.310424	0.314483
YGR122W	0.310059	0.403664
MUP1	0.309718	0.354412
ERG10	0.308598	0.52672
ROG3	0.30857	0.30948
PRY2	0.308386	0.0524609
PRC1	0.308194	0.454737
NCB2	0.307912	0.264412
SSZ1	0.30771	0.477763
MOH1	0.307585	0.395394
DPP1	0.307498	0.434355
RPS27A	0.307243	0.144891
CIA2	0.307176	0.30866
VMA1	0.306891	0.534868
VBA4	0.306519	0.301668
GRX2	0.306228	0.444942
ADE4	0.306186	0.408279
RPS13	0.306157	0.241869
FLR1	0.305936	0.313088
TEL1	0.305832	0.426127
YFH7	0.305803	0.232865
LPP1	0.305272	0.375129
VHR1	0.305219	0.40142
VMA13	0.304884	0.506625
AGC1	0.304818	0.409025
AVT4	0.304808	0.504201
PDH1	0.304757	0.4843
NVJ1	0.304325	0.393111
STR2	0.302538	0.341781
DUR1,2	0.302441	0.0649821
RPS0A	0.302305	0.28907
UTP10	0.301985	0.33889
ICL1	0.301145	0.48333
BDH2	0.301138	0.411992
TVP18	0.300188	0.371361
DCS1	0.299962	0.447261
CAF130	0.299422	0.371516
BUD7	0.299379	0.297926
SPG1	0.29935	0.398395
HIS2	0.299346	0.349234
RPA190	0.299082	0.44974
CTR86	0.298858	0.299259
ACP1	0.298749	0.377721
IRC7	0.298494	0.331992
SDH8	0.298435	0.448225
GIP3	0.298159	0.442249
MTD1	0.298141	0.381335
THI6	0.298104	0.454134
ENV7	0.297868	0.371752
MMM1	0.297817	0.391203
YKL133C	0.297807	0.35242
LSP1	0.297767	0.500198
LAT1	0.297015	0.478663
PNC1	0.296735	0.478663
PCL8	0.296606	0.369278
YIL002W-A	0.296254	0.144343
CBR1	0.295753	0.467253
LOT6	0.295625	0.24156
YPL191C	0.295343	0.334077
NIP1	0.295276	0.441626
RPL17A	0.294881	0.299259
COX5A	0.294374	0.42867
NUT2	0.294276	0.201708
SKP2	0.29422	0.225164
GPI10	0.294124	0.33889
YJR154W	0.293377	0.232669
RSC30	0.29298	0.362072
HIS5	0.292939	0.290142
RAS1	0.292592	0.317418
YOR292C	0.292563	0.379168
BAR1	0.292463	0.188168
PRS5	0.292364	0.428295
MET2	0.292311	0.418516
EGO4	0.292304	0.365088
MST1	0.291962	0.307359
ATP5	0.291311	0.478133
RPL2A	0.29111	0.251052
DSD1	0.290668	0.39072
YMC1	0.290117	0.30866
SPC3	0.289918	0.339279
MET22	0.289308	0.343946
YGR127W	0.28904	0.373763
IST2	0.288669	0.356103
PHO4	0.287539	0.356796
CIN2	0.287402	0.313416
DLD1	0.287074	0.433947
RPA43	0.286834	0.165919
MIG1	0.286587	0.290327
GUD1	0.286546	0.367918
ERV29	0.286543	0.450093
PCS60	0.28634	0.393111
MTR2	0.28625	0.313543
HAL9	0.28624	0.33455
GPN3	0.285521	0.258649
YPR003C	0.285103	0.317204
YNL333W/YFL059W	0.285078	0.343946
GUS1	0.284792	0.393111
SSA2	0.284307	0.363462
ATP3	0.284182	0.44633
FRD1	0.28385	0.395394
RPS15	0.283683	0.308379
MRPL23	0.283668	0.30948
GUA1	0.282164	0.359672
SDH6	0.281523	0.301668
ARF2	0.281088	0.409224
NFS1	0.280707	0.450093
PMR1	0.280248	0.334077
SEC1	0.279859	0.339407
PDA1	0.279672	0.403664
KHR1	0.278316	0.257946
BNS1	0.278191	0.228383
MIC12	0.277924	0.228661
LAG2	0.277778	0.308379
SRB8	0.277649	0.29594
PDC6	0.277626	0.240171
TEC1	0.277461	0.251052
THI20	0.27745	0.311543
RPL26B	0.277218	0.188535
COA3	0.276718	0.196261
TIF11	0.276688	0.307359
COX18	0.276496	0.168248
ARP3	0.27648	0.417079
AFG1	0.276274	0.343946
TPD3	0.276256	0.413681
URA5	0.27613	0.371361
UBA1	0.275812	0.411805
LAP2	0.275439	0.308379
YNL335W/YFL061W	0.275438	0.228383
IRA2	0.275366	0.434355
DAN1	0.275297	0.203031
RTA1	0.275194	0.144406
QDR1	0.275176	0.280506
PRR2	0.275138	0.299259
ODC1	0.27488	0.39634
TPH3	0.274407	0.298287
HPM1	0.273935	0.243418
ERG24	0.273891	0.285427
COQ10	0.273856	0.197528
YPR127W	0.27202	0.363964
GSY2	0.271958	0.371175
MSC1	0.271691	0.395394
CPT1	0.271558	0.346039
ILV6	0.271405	0.273534
VPS15	0.27124	0.360351
TOR1	0.270961	0.365088
MBA1	0.270714	0.327614
RPA12	0.270648	0.0937209
STE6	0.269368	0.314922
BIO4	0.269302	0.20578
BAP2	0.269203	0.347857
DBP6	0.269114	0.248906
DRN1	0.269112	0.273351
YLR307C-A	0.269024	0.274312
SNF4	0.26889	0.329172
BAT1	0.268487	0.261177
FRS2	0.2683	0.362269
HEL1	0.268066	0.308379
SCM4	0.268038	0.315136
ROT2	0.267918	0.351922
PTK2	0.267677	0.28
ERG25	0.267564	0.403664
SER33	0.267496	0.321684
AIM18	0.266731	0.299323
YBL039W-B	0.266567	0.114359
FOL2	0.266268	0.275285
MNT4	0.265865	0.256546
CAR1	0.265502	0.398395
PHO8	0.265462	0.373433
DPH1	0.26512	0.235418
BAT2	0.265096	0.353555
SSA1	0.264723	0.343524
ATG40	0.263652	0.313543
DCS2	0.263532	0.299259
HFD1	0.263515	0.363964
PET10	0.262816	0.35242
PET191	0.262672	0.151555
OPY1	0.262671	0.285301
YNL194C	0.262486	0.248603
SKI6	0.26226	0.237398
YHL012W	0.261986	0.150886
HMF1	0.261753	0.278575
RKM1	0.261415	0.33889
HYP2	0.261134	0.316711
YRR1	0.261049	0.361711
RMD9	0.261029	0.281002
OYE3	0.260721	0.177745
CYS4	0.260568	0.371478
GWT1	0.260548	0.179695
KTR6	0.26044	0.317196
RTN1	0.260296	0.353209
BUD4	0.260122	0.233877
PXP2	0.260067	0.313486
LCB4	0.260026	0.315845
ATP17	0.259841	0.301668
GIP1	0.259656	0.234567
MRPL7	0.259585	0.261322
MET3	0.259543	0.273351
PIR5	0.25951	0.233926
ORM1	0.25933	0.297327
AIM19	0.258936	0.308379
CSG2	0.258897	0.359231
HPA3	0.258842	0.265149
PTH1	0.258771	0.234567
ERG27	0.257717	0.35242
QNS1	0.257656	0.30335
GEM1	0.257436	0.301771
MVD1	0.257274	0.339407
SSP1	0.256973	0.132677
PUT1	0.256884	0.255921
TKL2	0.255719	0.297327
FAD1	0.25544	0.257946
RKI1	0.255144	0.213966
RIB7	0.255062	0.254071
YKR015C	0.255015	0.214224
TTI2	0.254975	0.220764
YDC1	0.254593	0.313543
MPM1	0.254198	0.285427
YNL193W	0.253816	0.236959
GAT3	0.253638	0.0701754
CRF1	0.253023	0.254071
GTO3	0.252983	0.215196
SPT23	0.252628	0.321658
RFT1	0.252441	0.287224
GCN1	0.252416	0.297327
FRE5	0.251719	0.245911
MUP3	0.251538	0.254744
SNN1	0.251354	0.186315
YHR045W	0.251326	0.310029
SML1	0.251243	0.296304
RPB8	0.251039	0.19522
SYO1	0.250985	0.226646
GSP2	0.250969	0.312936
RPL6A	0.250559	0.150886
SUT2	0.250416	0.235984
VPS8	0.249803	0.241869
TRX2	0.249492	0.259154
VMA8	0.249271	0.30948
TOG1	0.249083	0.297262
PER1	0.249068	0.242392
APL1	0.248999	0.25744
YLL058W	0.248765	0.230488
RTK1	0.24852	0.297926
TEA1	0.248473	0.244849
COQ1	0.247988	0.28907
YCR023C	0.24794	0.302582
PPS1	0.247809	0.24156
YBP2	0.247684	0.234567
URA1	0.24717	0.202702
AGP3	0.246949	0.261177
RCH1	0.246939	0.272911
YPR098C	0.246906	0.241869
NIT3	0.246861	0.308379
YOL014W	0.246715	0.0860329
RRT5	0.246597	0.12085
ADO1	0.24651	0.26475
YHR097C	0.246444	0.310933
SVP26	0.245595	0.194872
EMP70	0.245236	0.290327
YMR099C	0.24513	0.272226
LSC1	0.245129	0.326232
PTP3	0.24493	0.246592
PMT4	0.244928	0.287986
ORM2	0.244785	0.287986
YJL206C	0.244708	0.231172
MRPL11	0.244583	0.1579
CLB6	0.244389	0.134085
ATG15	0.244346	0.340282
TUL1	0.244262	0.239984
HUB1	0.244106	0.10941
SIP4	0.243998	0.279277
HIR3	0.243907	0.280058
MMT2	0.243561	0.308379
AEP1	0.243475	0.29594
OXP1	0.243469	0.234237
AAH1	0.243446	0.186852
ALG3	0.243416	0.275355
SPG5	0.243396	0.304482
VTC1	0.242746	0.213651
SNU56	0.24261	0.184351
PRR1	0.242343	0.28
PGM2	0.242117	0.356796
HOC1	0.24191	0.263556
YBR284W	0.241539	0.225164
YKL065W-A	0.241366	0.0860329
MST28	0.241366	0.201639
YGR168C	0.241353	0.228383
BPL1	0.240952	0.239292
ERG12	0.240537	0.253172
ERG13	0.240417	0.339407
MRP10	0.240399	0.121644
URA7	0.240303	0.173147
SER3	0.240222	0.28907
FAA2	0.240053	0.236522
RPL11B	0.239883	0.153233
PCL10	0.239589	0.256546
YMR155W	0.239539	0.283572
YGR066C	0.23899	0.239424
GPI1	0.238987	0.239698
SPR2	0.238923	0.0859096
CHS7	0.238542	0.256546
YDR476C	0.238096	0.222607
OAC1	0.237654	0.192882
CIT3	0.237634	0.33889
VBA5	0.236827	0.21747
SEF1	0.236596	0.274635
YCL049C	0.23558	0.259699
PAU23	0.235491	0.135114
CNA1	0.235244	0.2157
AIM46	0.235175	0.257946
NAM8	0.23497	0.206837
HSH155	0.23473	0.274254
RPL22A	0.234692	0.119043
LSB6	0.23427	0.244849
RDR1	0.234108	0.226754
PAM17	0.233862	0.231172
NHX1	0.233664	0.258649
YKL162C	0.233018	0.227109
ERG2	0.232986	0.301668
TRM1	0.232941	0.237398
PCM1	0.232676	0.294623
ECM10	0.23249	0.212
ECM21	0.232356	0.322532
ELO3	0.232236	0.275355
SSN8	0.232003	0.177745
ACK1	0.231846	0.206193
YGR026W	0.231593	0.297327
GPI18	0.231393	0.206837
ALG12	0.231073	0.259154
YPL247C	0.230585	0.254071
GLC3	0.230264	0.317204
HSP150	0.229994	0.269514
RPS20	0.22982	0.156862
LST7	0.229689	0.204917
NCS6	0.229547	0.232714
TOM40	0.229404	0.290327
PEX7	0.228944	0.256546
YJL213W	0.2288	0.177745
DPH2	0.228646	0.207795
RPS9B	0.228345	0.16732
PRO2	0.228295	0.247373
AIM17	0.228098	0.20578
ARP10	0.228076	0.0977082
YGR161W-C	0.227904	0.146045
CYS3	0.227644	0.221229
SEC59	0.227628	0.235418
ADH2	0.227492	0.241869
BSP1	0.227253	0.244787
TAD1	0.22692	0.1831
CAT2	0.226863	0.313543
AGP2	0.226665	0.269057
KGD2	0.226596	0.310643
TRX1	0.226378	0.230692
ODC2	0.226184	0.170827
TSC10	0.22574	0.230488
MNT3	0.225038	0.232714
SDS22	0.224869	0.241869
FRE4	0.22441	0.20578
SAW1	0.224378	0.168626
BEM2	0.224031	0.272931
TRE1	0.224003	0.233877
GAS5	0.223923	0.243229
YPR1	0.223764	0.250809
ELO1	0.223724	0.287245
MID1	0.223664	0.184325
BCH1	0.223549	0.287986
IPA1	0.223387	0.170644
SHR3	0.22328	0.177745
YPR147C	0.223026	0.228383
KAP123	0.222809	0.260569
TOM7	0.222626	0.133851
SEG1	0.222327	0.234696
PPR1	0.222064	0.168248
HEM25	0.221857	0.139407
TIR3	0.221784	0.231651
CIT1	0.221414	0.281192
PSE1	0.221116	0.261605
UBP11	0.220747	0.228732
PAT1	0.220581	0.248551
BNA4	0.22044	0.257946
YEN1	0.220336	0.191606
ATP11	0.219873	0.198595
YMR102C	0.21982	0.227643
ARO80	0.21981	0.238667
MAL31	0.219435	0.234237
RNR3	0.219202	0.170727
MIX14	0.219132	0.0977587
RPA135	0.218964	0.237398
YAK1	0.218931	0.261562
PBI2	0.218928	0.257946
ATP22	0.218586	0.232732
TRM112	0.218339	0.186852
INN1	0.21787	0.190217
ADE8	0.217582	0.201164
SRB2	0.21754	0.186315
CAR2	0.21743	0.295691
RTP1	0.2173	0.200562
RCR1	0.21728	0.237398
MCK1	0.217237	0.192761
DOA4	0.217036	0.241292
APE4	0.216835	0.232693
BNA6	0.216834	0.249064
DIE2	0.216822	0.181486
SUL1	0.216787	0.182765
REV3	0.216721	0.206925
DGK1	0.216672	0.23314
RIM11	0.216561	0.260058
UGP1	0.216541	0.265408
GDA1	0.215805	0.264002
DBF2	0.215735	0.214285
YNL144C	0.215313	0.1831
INP2	0.215256	0.197837
TAE1	0.21474	0.104599
GDH1	0.214726	0.186852
CUP9	0.214687	0.240171
TMT1	0.21443	0.196261
RRT6	0.214404	0.20578
PEX4	0.214396	0.177745
LPD1	0.214383	0.259699
EBS1	0.214324	0.242392
CDC6	0.213925	0.18927
CRD1	0.213865	0.188168
HSP78	0.213842	0.256546
CRT10	0.213823	0.212
NCA3	0.213783	0.23314
DOT5	0.213371	0.222707
AVT6	0.213039	0.230488
YOR296W	0.212827	0.224776
SWI5	0.212624	0.103661
ARP2	0.212577	0.234567
OLE1	0.212435	0.282161
MDM38	0.212212	0.2157
FBP26	0.212104	0.243418
KAR9	0.211945	0.168191
GPD1	0.211844	0.237398
HMO1	0.211717	0.199911
MRPS8	0.211647	0.0987775
WHI2	0.211485	0.252414
SFB2	0.211468	0.211866
PRY3	0.211404	0.186439
MEO1	0.211199	0.126208
FCF1	0.211127	0.115787
EFB1	0.210259	0.192675
LAM1	0.210159	0.215862
GPB2	0.210076	0.253432
LDH1	0.209982	0.232845
LRE1	0.209947	0.222746
IMG1	0.209535	0.16079
OST3	0.209361	0.23314
RRP6	0.209226	0.192254
RPS26A	0.208918	0.178336
MRX9	0.208394	0.185704
STT4	0.208231	0.235402
RDL2	0.208166	0.171248
SHH3	0.208157	0.130007
APE2	0.208138	0.266172
GRX4	0.207584	0.163248
FRE1	0.207486	0.241372
SIT1	0.207431	0.227399
KXD1	0.20711	0.171655
YPK9	0.207032	0.238659
AIM33	0.20684	0.162011
HYR1	0.20678	0.196261
SRV2	0.206511	0.244787
COS8	0.206467	0.235418
MAF1	0.206319	0.244849
MIG2	0.206137	0.186852
ISC1	0.206016	0.215196
RTC6	0.20601	0.0973631
MTH1	0.205739	0.194857
GRX5	0.205653	0.172601
YLR456W	0.205624	0.131746
PGM1	0.205465	0.192761
ARN2	0.205393	0.174922
ATP20	0.205295	0.20578
TBS1	0.205278	0.179695
QDR3	0.205119	0.186439
TMA7	0.204499	0.105906
MAS1	0.204413	0.222746
IMD3	0.204102	0.215862
OST2	0.203952	0.170356
VPS13	0.203921	0.248603
ROM1	0.203772	0.194872
YMR187C	0.20351	0.158378
GCD7	0.203378	0.200596
SSH4	0.203196	0.207795
AIF1	0.20297	0.116607
YEA4	0.202646	0.136865
URH1	0.202514	0.189728
RIM20	0.202282	0.188168
YPR117W	0.202163	0.228383
SEC15	0.202013	0.190353
IDP2	0.201742	0.253172
SNX3	0.201483	0.125804
BOL1	0.20125	0.166073
DIN7	0.201133	0.177423
NOP1	0.200786	0.193698
RIX7	0.200761	0.168713
SAC1	0.200756	0.230488
SIZ1	0.200151	0.196261
YLL054C	0.199563	0.18089
EUG1	0.19949	0.186439
ALD4	0.19946	0.233157
PHO90	0.199453	0.207699
YPR063C	0.198805	0.220904
TYR1	0.198791	0.200596
HXT13	0.198589	0.14057
BCH2	0.19853	0.169954
PDX1	0.198472	0.228441
ORC5	0.198336	0.107484
SFM1	0.198155	0.172462
YER156C	0.198065	0.168626
YPR078C	0.198053	0.0797158
MHT1	0.198037	0.114801
ECM31	0.198031	0.142827
GFD2	0.197876	0.0524609
SSD1	0.197808	0.181078
SLD5	0.197654	0.156226
NQM1	0.1976	0.227399
NEM1	0.197575	0.204917
YLR352W	0.197182	0.1831
SFB3	0.197172	0.196261
YBR063C	0.197156	0.186439
BUD17	0.197116	0.12621
MET13	0.197041	0.188104
CTR2	0.19697	0.192761
RRP42	0.196931	0.147958
PUN1	0.196677	0.228661
TOA2	0.196629	0.1265
RGA1	0.196048	0.226754
NPR1	0.195807	0.216657
RPL39	0.195311	0.106666
PKR1	0.195267	0.119043
TSC3	0.195211	0.165721
MMR1	0.195096	0.212346
VPS34	0.19507	0.213316
SWC7	0.194964	0.0937466
SAS5	0.194926	0.142827
IZH1	0.194776	0.230488
RTT101	0.19463	0.194825
TYS1	0.194182	0.196261
VID24	0.193726	0.196261
UBI4	0.193536	0.194825
TIF1	0.193079	0.223458
WBP1	0.192788	0.2157
SEN2	0.192556	0.177745
LIP5	0.192401	0.193671
VTC3	0.192387	0.210295
COS111	0.192109	0.19894
ATG36	0.192063	0.179716
SPE4	0.191998	0.12085
RPL32	0.191956	0.116607
HIS7	0.191874	0.168248
SDH7	0.191853	0.118343
JLP1	0.19175	0.104991
WRS1	0.191627	0.171625
GRS1	0.191565	0.222607
FAP1	0.191565	0.181078
INP53	0.191132	0.215691
YPT7	0.190699	0.188168
NIT2	0.190551	0.142379
FLC3	0.190455	0.213651
PST1	0.189901	0.190353
YHR033W	0.189767	0.168954
VMA7	0.189746	0.206837
ACF2	0.189599	0.194825
MRPL15	0.189568	0.117785
CSS2	0.189209	0.167727
STE13	0.189149	0.170727
SLA1	0.188715	0.220401
AEP2	0.188538	0.167703
ERB1	0.188421	0.1302
SKN7	0.188409	0.20578
ARA2	0.188272	0.206952
TVP38	0.188237	0.177745
VPS73	0.187054	0.19132
YNL208W	0.186794	0.210842
DXO1	0.186657	0.111679
CDC20	0.186567	0.127566
YMR1	0.186491	0.163878
FMS1	0.186409	0.194825
MRM2	0.186305	0.178791
AVT2	0.18619	0.186852
DSE3	0.186128	0.138737
SSL1	0.185415	0.192761
MOT1	0.185365	0.202734
ARF3	0.185345	0.135535
GSC2	0.185241	0.192187
EMI2	0.185214	0.20578
VMA5	0.185135	0.182207
ALD3	0.185087	0.153233
MDH1	0.184734	0.205792
YDL085C-A	0.184667	0.118343
SYG1	0.184529	0.188168
SCP160	0.18442	0.191606
ERT1	0.18441	0.142699
SPE1	0.184333	0.1831
TIM22	0.184126	0.1265
FCY21	0.183988	0.144541
SNG1	0.183968	0.135535
UTP22	0.183923	0.154538
YGR117C	0.183722	0.161585
CPA1	0.183511	0.223458
IRA1	0.183262	0.20578
MRPS5	0.183164	0.116587
NPT1	0.182879	0.186879
ATG33	0.182861	0.168073
MAP1	0.182349	0.17698
PXP1	0.18229	0.192761
APC11	0.182282	0.116665
YGR126W	0.182029	0.107484
MAM33	0.181986	0.152191
RPL28	0.181633	0.141563
HTS1	0.181594	0.1831
YET3	0.181106	0.182765
VPS52	0.180927	0.144541
PNP1	0.18082	0.178791
STB5	0.180811	0.133845
TMA108	0.180758	0.175819
VIP1	0.180755	0.201164
PEX27	0.180355	0.130904
KAE1	0.179306	0.182765
GOT1	0.179003	0.0887903
MRS4	0.178743	0.135535
PHO80	0.178076	0.152331
REV1	0.177961	0.110784
SWT21	0.177887	0.162569
ATH1	0.177537	0.175387
CHK1	0.177482	0.177745
YGL114W	0.177325	0.17175
YDR391C	0.177272	0.158524
PMP3	0.177126	0.168626
TIM23	0.176643	0.182765
MHF2	0.176576	0.0523441
RET1	0.176575	0.192254
RSC9	0.176473	0.172601
RAS2	0.176346	0.16499
YMR295C	0.176023	0.194825
LHP1	0.175972	0.151555
ASP1	0.175923	0.156225
SIP3	0.175707	0.16763
RPS23A	0.175583	0.0915536
PEX12	0.175526	0.16067
VTH1	0.175492	0.168073
KTR1	0.175169	0.194825
DAP2	0.17507	0.167727
UTP5	0.174068	0.109685
PMI40	0.174012	0.171097
PDR15	0.173951	0.172462
IDH2	0.173945	0.177745
HEM2	0.173431	0.171625
SEC23	0.173311	0.131746
SOL4	0.173268	0.16215
YLR363W-A	0.173231	0.0368501
ESL1	0.172914	0.168248
ADH6	0.172833	0.142675
TUF1	0.172753	0.179711
MCM7	0.17261	0.163248
MRS6	0.172598	0.186459
SAC7	0.172417	0.179695
PPA2	0.172331	0.144406
YGL159W	0.172082	0.152727
GPI8	0.171953	0.131746
SUR7	0.171897	0.124522
SIP1	0.171694	0.177745
ERV14	0.171605	0.148823
KAP95	0.171592	0.156942
YJL218W	0.171556	0.147287
FMP27	0.17154	0.169954
FLO10	0.171484	0.139105
ERV1	0.171328	0.0906695
APM4	0.171273	0.1579
CIT2	0.171134	0.171097
MET30	0.171071	0.165639
NUP100	0.171059	0.171625
YBL055C	0.170958	0.166073
NAS2	0.170699	0.142827
MSN1	0.170438	0.132677
YBR053C	0.170399	0.165546
SPE3	0.169956	0.184325
FMP16	0.169448	0.126152
CBP3	0.1692	0.143197
STP3	0.169145	0.163248
NUR1	0.169112	0.144891
CMP2	0.168831	0.166879
PET111	0.168717	0.142827
AVT3	0.168564	0.163084
NTG2	0.168505	0.1265
YKL068W-A	0.168457	0.0786122
NUT1	0.168295	0.163248
NRG2	0.167895	0.0806571
YDL157C	0.167869	0.124571
YLR053C	0.167646	0.10092
YMR315W	0.167419	0.171248
FEN2	0.167337	0.156831
MNL1	0.16726	0.132677
THI80	0.167209	0.10129
GTO1	0.167174	0.143531
INA1	0.167034	0.130218
SEN54	0.166946	0.151555
HOR7	0.166849	0.0937209
AAD10	0.166758	0.144343
UTP13	0.166609	0.0857964
MSC7	0.166258	0.119043
YKL077W	0.166088	0.156942
RCR2	0.165878	0.150186
AIM24	0.165806	0.146819
AUR1	0.165731	0.15247
YIH1	0.165538	0.144541
CLB1	0.165175	0.0820971
PCT1	0.165064	0.165721
VMA2	0.165056	0.172462
AAT1	0.164756	0.121272
HAP4	0.164601	0.168626
LMO1	0.164521	0.128074
FAA1	0.164501	0.163248
CSH1	0.164462	0.116892
TPC1	0.164438	0.12085
RPL13B	0.164174	0.0860329
AME1	0.164085	0.116607
RPL38	0.164009	0.0963347
HIP1	0.163459	0.144541
NAT1	0.163271	0.17164
DAK1	0.163128	0.170827
MET14	0.163126	0.116607
SOR2	0.163061	0.104472
SHY1	0.162971	0.136865
MKT1	0.162619	0.151555
YDL086W	0.162214	0.172148
SFT2	0.162162	0.158151
AGA1	0.162063	0.161281
THI3	0.161839	0.15961
PSK1	0.16159	0.157688
ARB1	0.161256	0.166848
RCE1	0.16109	0.103761
BNA3	0.160891	0.136006
NOC3	0.160863	0.118828
HYM1	0.160446	0.144541
HSP10	0.160414	0.132677
ARC18	0.160233	0.1579
MRPL38	0.160158	0.117785
UBC7	0.16011	0.135114
SYN8	0.160084	0.144858
GUK1	0.159892	0.149742
BEM3	0.159751	0.144858
CAN1	0.159574	0.111679
CAF16	0.159285	0.106666
GTT1	0.15893	0.144858
ACE2	0.158815	0.104527
LAA1	0.158698	0.13552
FAR1	0.15869	0.116607
AYT1	0.158411	0.0860329
PIB1	0.158132	0.162569
GDS1	0.157982	0.151555
RRP43	0.157824	0.123319
GPI17	0.157736	0.158048
ETR1	0.157246	0.165721
RPL19A	0.157148	0.106349
MRE11	0.157083	0.135535
AIM11	0.157015	0.083028
GVP36	0.156804	0.144858
MSP1	0.156801	0.1352
UBP8	0.156768	0.116174
YMR317W	0.156628	0.124832
TTI1	0.156616	0.136006
EPT1	0.15625	0.144406
RSN1	0.155552	0.1265
NEW1	0.155498	0.16084
YNR040W	0.15544	0.0523286
ALG11	0.155395	0.134085
GLK1	0.155355	0.163248
ATP18	0.155334	0.119043
DUF1	0.155324	0.144343
SEC10	0.15525	0.147452
POS5	0.15469	0.148026
CDC42	0.15412	0.15391
YEH2	0.154049	0.126208
FAR7	0.15404	0.111679
LCB5	0.154027	0.135535
MEC1	0.153787	0.151555
AVT7	0.153762	0.124832
NDE2	0.153635	0.132677
YGR016W	0.153234	0.0747805
SIT4	0.153144	0.149742
MAK5	0.153124	0.0951038
FZO1	0.152616	0.144541
UBX7	0.152551	0.124522
MON2	0.15251	0.139105
IPI1	0.152485	0.0524609
YKE4	0.152207	0.109957
YIL108W	0.152103	0.132677
POP3	0.151781	0.0502263
RPA14	0.151701	0.104138
TCB3	0.15151	0.163637
SDD2	0.151492	0.0860845
PEX29	0.151398	0.130118
MNP1	0.15134	0.107484
HOL1	0.151101	0.135321
NTG1	0.151043	0.124571
ATF1	0.150838	0.138532
COX10	0.150701	0.110784
CUE2	0.150349	0.0876878
CLD1	0.150031	0.138532
SRF1	0.149922	0.126208
YHM2	0.149907	0.0977082
VMA16	0.149746	0.144541
CDC73	0.149566	0.125186
HER2	0.148861	0.090229
DYS1	0.148507	0.104456
GPT2	0.148368	0.136034
MRP4	0.148171	0.116798
MOG1	0.148121	0.103661
MHP1	0.147886	0.134654
TAF9	0.147552	0.113305
PDR11	0.147506	0.121518
ORC3	0.147361	0.0840242
NEO1	0.147202	0.136865
HRQ1	0.147154	0.12621
NSG1	0.147112	0.100962
HSP12	0.146816	0.101257
MED8	0.146635	0.0987775
YDR090C	0.14626	0.133495
BRE4	0.146039	0.128563
SLM1	0.145827	0.129685
SNA3	0.145635	0.140314
RPL22B	0.145463	0.0524609
NAM2	0.145353	0.117785
RCF2	0.145214	0.118139
EHD3	0.14504	0.12621
IMD4	0.145024	0.0953245
CAB1	0.144867	0.142424
SDT1	0.144771	0.096928
VOA1	0.144488	0.131746
YLR049C	0.144459	0.130218
PAN5	0.144328	0.132677
TIM9	0.144304	0.037147
RPL31A	0.144069	0.0780298
YSP2	0.143908	0.139437
RCM1	0.14383	0.0880636
PEP4	0.143808	0.151555
MSC6	0.14364	0.12621
NPR2	0.143601	0.111679
ECM27	0.143519	0.119043
YJL107C	0.143353	0.103761
RPO31	0.143243	0.1302
THP1	0.143185	0.0860449
UBP14	0.142987	0.126208
MON1	0.142976	0.126819
SNC2	0.142943	0.0879833
MRPL6	0.142659	0.0937209
RRT2	0.14244	0.114359
MRS2	0.142297	0.0977082
MSG5	0.142216	0.106172
AIM2	0.142083	0.130109
HCH1	0.142081	0.0860329
COR1	0.141994	0.117735
TMS1	0.141835	0.10111
YDR338C	0.141054	0.104456
TAT2	0.141013	0.111679
ENT4	0.140892	0.0987775
RPS10A	0.14086	0.0747805
MLC1	0.140814	0.106677
AUS1	0.140714	0.114359
TRS120	0.140691	0.111585
ECM15	0.140651	0.0786122
BPH1	0.140497	0.127675
CIR1	0.140091	0.115108
ECM18	0.139907	0.0924158
MBR1	0.139773	0.119043
CPR4	0.139587	0.138532
NIS1	0.139571	0.10036
MRPL8	0.139531	0.0743923
PTC2	0.139425	0.122379
ELP3	0.139405	0.107484
MCD4	0.139399	0.106677
UBP13	0.139385	0.124522
HRI1	0.139299	0.0903213
ATG19	0.139178	0.138907
OPT1	0.139111	0.119043
FAA4	0.138974	0.144541
ARC40	0.138968	0.116798
TPS1	0.138942	0.144343
PTA1	0.138911	0.131851
CCT6	0.138615	0.1352
MDL1	0.138555	0.13444
NCW2	0.138333	0.115444
COT1	0.138063	0.10765
CST26	0.137827	0.100962
PTK1	0.137788	0.097416
CET1	0.137692	0.117132
ARC35	0.137637	0.126208
PRT1	0.137439	0.126208
ALG8	0.137394	0.120665
NUP157	0.137248	0.119043
TIF35	0.137055	0.114188
PCL9	0.137038	0.0562464
CBT1	0.136595	0.0860329
VTC4	0.136418	0.142379
SUT1	0.136346	0.0860329
ABZ1	0.136286	0.110867
ANY1	0.136263	0.119043
SSA3	0.135941	0.132677
JAC1	0.135924	0.0617906
VEL1	0.135751	0.052223
KAR2	0.135429	0.126208
YNL033W	0.135388	0.0851382
NAT3	0.135379	0.0852372
STE23	0.135076	0.103997
SEC8	0.134965	0.10129
ERC1	0.13468	0.117002
FSH2	0.134511	0.0869769
AIP1	0.134351	0.129219
MSH3	0.134287	0.0937209
OSH6	0.13419	0.103992
SWF1	0.134109	0.0902154
DUS3	0.134036	0.0747805
KRE5	0.134008	0.116607
APC2	0.133852	0.112772
YNL122C	0.133303	0.0520257
CTO1	0.132993	0.0695703
SRP1	0.132772	0.120665
YJL132W	0.132653	0.116607
SSL2	0.132649	0.112277
OST6	0.132554	0.115787
MDR1	0.132493	0.114841
PIP2	0.132481	0.0927738
NAM7	0.132364	0.1265
MRP1	0.132266	0.0984178
PRP18	0.132124	0.0705692
PWP2	0.132116	0.0787406
PAN6	0.132079	0.104599
YMR253C	0.131831	0.0977082
PRS4	0.131493	0.0879833
PLP1	0.131484	0.0786122
PRS3	0.131385	0.109685
PEX6	0.131182	0.101257
PHM7	0.131128	0.1125
SMF1	0.130915	0.114619
ZWF1	0.130823	0.126208
SFK1	0.129936	0.102585
SYF1	0.129828	0.104456
MNN11	0.129721	0.0915536
YSH1	0.129517	0.0924096
MRX3	0.129504	0.104527
VID27	0.129349	0.119043
SEC12	0.129327	0.0985502
PUS1	0.129319	0.0862193
ARV1	0.128951	0.0617906
PRE8	0.128933	0.10092
PHO81	0.128929	0.114841
AIM32	0.128927	0.058342
LST8	0.128919	0.0989278
TIF2	0.128917	0.12085
ELP6	0.128748	0.0879833
ECM14	0.128737	0.112277
MRP17	0.128554	0.0546481
FMP10	0.12845	0.0899705
SAY1	0.128399	0.0919514
RMR1	0.127871	0.105941
DNF3	0.127841	0.107447
YNL095C	0.127767	0.100962
RGT1	0.127486	0.123548
CPR6	0.127389	0.107989
YPL034W	0.127323	0.0591478
GLN3	0.12724	0.108108
SWM2	0.127137	0.0524609
YML018C	0.126939	0.0977082
TMN2	0.126508	0.0951038
GAC1	0.126477	0.119632
MIS1	0.126271	0.116607
KTI12	0.126184	0.0747204
RHB1	0.125953	0.0782204
AKR2	0.125507	0.111141
KEL1	0.125506	0.0903213
GOS1	0.125162	0.0944699
TCO89	0.124938	0.106083
PTM1	0.124844	0.116607
RRP5	0.124806	0.0903613
YER158C	0.124801	0.0977082
RRI2	0.124769	0.0937209
YJR158W/YDL245C	0.12461	0.0924158
SAC6	0.12408	0.116607
CCA1	0.123798	0.0921164
CCH1	0.123595	0.0971232
GPA1	0.123071	0.0788057
QRI1	0.123049	0.111039
UBP7	0.122766	0.0987775
YJL068C	0.122571	0.111679
YTP1	0.122505	0.10449
YIP3	0.122017	0.103992
YHI9	0.121893	0.0862193
HAP1	0.121798	0.107484
NSP1	0.12143	0.100603
MMP1	0.121393	0.0915536
MMS22	0.12135	0.0924158
ERV46	0.121125	0.104527
NBP35	0.121029	0.0869769
RTC3	0.121012	0.0513061
YDL129W	0.120997	0.0524609
RTC2	0.120636	0.0887903
ORC2	0.120601	0.0903613
MSH2	0.120583	0.109388
HSM3	0.120362	0.0987775
MCP2	0.120205	0.0856961
MAC1	0.120027	0.0937209
YDL109C	0.120024	0.0937466
NRT1	0.119822	0.096928
ATG12	0.119813	0.0710047
YGR054W	0.119805	0.0937466
VMA6	0.119513	0.111679
SLA2	0.119097	0.107484
VMA3	0.118825	0.0788413
YCP4	0.118499	0.100962
MET18	0.118051	0.0860845
RPB7	0.11791	0.0869769
ROD1	0.117907	0.0880636
NAT2	0.117656	0.0879833
YNL195C	0.117641	0.0787406
CIN5	0.117437	0.0924158
RRD1	0.117385	0.0845416
HXT4	0.117161	0.0574186
NSR1	0.116753	0.0524609
MSI1	0.116734	0.0852372
ADE2	0.116399	0.103992
PDR3	0.116213	0.0869769
SRO77	0.116207	0.0937378
YBR197C	0.116183	0.0879833
RSM10	0.115959	0.0632126
CDC33	0.115941	0.0823658
PBA1	0.115762	0.0710283
YMR262W	0.115703	0.0782204
YJR085C	0.115515	0.0801628
SFA1	0.115506	0.0937466
RPS17A	0.115422	0.0544019
HMI1	0.115333	0.068171
LYS14	0.115194	0.0851382
HXK1	0.115133	0.0833916
SSK22	0.114422	0.0973631
FTR1	0.114333	0.0860329
ARP8	0.114077	0.0977383
ATP4	0.113959	0.0924158
ESBP6	0.113855	0.0850319
HAC1	0.113806	0.0989278
PDR10	0.113784	0.103975
YDR341C	0.113589	0.0937209
NVJ3	0.113581	0.0780298
LNP1	0.113368	0.0781787
KTR3	0.113152	0.0951038
PER33	0.113069	0.0853161
MSS18	0.113036	0.0787406
NRD1	0.113021	0.0831384
AXL1	0.112233	0.0789153
GEF1	0.112213	0.0845416
FRA1	0.112183	0.0937209
MLH1	0.112177	0.0915536
DRS1	0.111892	0.0503838
YPR172W	0.111857	0.0860329
YMR206W	0.111726	0.0946522
KAR5	0.111724	0.0545165
SEA4	0.111585	0.0915536
YKL033W-A	0.111576	0.0617906
NUP82	0.111423	0.082368
TDA5	0.11133	0.0680391
LST4	0.111191	0.0869769
UGA2	0.11119	0.091119
RBH1	0.110984	0.0683653
PRP16	0.110895	0.0880455
MPD1	0.110777	0.0793121
GPI2	0.110447	0.080085
PYK2	0.110258	0.088841
MRPL39	0.110252	0.039538
TCD2	0.110105	0.0747805
NUP170	0.109941	0.091119
RRT8	0.109921	0.0934362
CYC7	0.109906	0.068171
ZRT3	0.109841	0.0887903
YNR066C	0.109822	0.0740389
FYV10	0.10982	0.0879833
PFY1	0.109807	0.0852372
DDL1	0.10976	0.0764843
PKP1	0.109714	0.091119
ROY1	0.109583	0.0879833
PAM1	0.109553	0.0951038
RPG1	0.109427	0.0937466
SLH1	0.109371	0.0915536
AAT2	0.109181	0.0924158
LAG1	0.108813	0.0867038
KRE9	0.108572	0.0846763
HXT1	0.10828	0.0578172
[truncated: 3,356 more rows]
